# Supplementary material for: Mechanically transduced immunosorbent assay to measure protein-protein interactions
Source: eLife. 2021 Sep 28;10:e67525. doi: 10.7554/eLife.67525 (PMC8479797; doi:10.7554/eLife.67525)
Supplement: Figure 1—source data 1. [file elife-67525-fig1-data1.xlsx]

## Sheet: Sheet1
Avidin-streptavdin
0.0728091	0.122072	0.0896334	0.11601	0.0632175	0.0636446	0.0628771	0.0626123	0.0609505	0.0662347	0.0769679	0.0892933	0.0962706	0.0985007	0.0751577	0.101338	0.0828944	0.123852	0.0682132	0.0814368	0.0761592	0.0965739	0.080781	0.0623999	0.067184	0.0677872	0.0734531	0.0683532	0.0636013
0.0860111	0.0850399	0.0892752	0.110518	0.12988	0.103599	0.07374	0.0826281	0.104318	0.0897369	0.126976	0.108982	0.0694326	0.0832545	0.0927785	0.0987856	0.0782917	0.0856951	0.12561	0.108475	0.123986	0.0719793	0.0754839	0.0729493	0.0674996	0.152861	0.0594694	0.0815527	0.105658
0.0924327	0.133502	0.106993	0.142271	0.101534	0.0959657	0.0936597	0.109267	0.131627	0.133009	0.122786	0.100367	0.130546	0.118342	0.105304	0.0929436	0.0780193	0.0930016	0.0785755	0.106495	0.0809373	0.0984158	0.0924431	0.104083	0.103701	0.0896987	0.0931923	0.106164	0.126952
0.064808	0.105194	0.0878876	0.102577	0.09138	0.0887141	0.0963585	0.0965736	0.075937	0.0830993	0.0951065	0.0777721	0.0920766	0.0747898	0.079735	0.0593627	0.105903	0.0884178	0.0752219	0.0626371	0.0723362	0.0518522	0.0599767	0.068682	0.101862	0.0642609	0.060546	0.0761799	0.0672951
0.0430163	0.0548088	0.074129	0.0560055	0.0639681	0.0573639	0.0514753	0.0645514	0.0431762	0.0596897	0.0772115	0.0465859	0.0767996	0.0526528	0.0500475	0.0476399	0.0573486	0.0493309	0.0586983	0.0547229	0.0778647	0.0434166	0.0375887	0.0598645	0.076982	0.0530849	0.0710145	0.0613025	0.0570805
0.0624814	0.071242	0.0630076	0.070069	0.0573191	0.106734	0.0995693	0.0744595	0.0670898	0.0796915	0.0631841	0.0826705	0.0575361	0.0639701	0.0965415	0.0592021	0.0891908	0.0578153	0.0651035	0.137285	0.14249	0.0904692	0.131313	0.0632874	0.137796	0.124472	0.218067	0.118561	0.16618
0.0704081	0.102852	0.0887049	0.103578	0.0562359	0.0737931	0.0483094	0.107182	0.0428948	0.0869059	0.0469456	0.0892369	0.0787589	0.0575774	0.0449563	0.0659413	0.0576144	0.0698701	0.0473674	0.036919	0.0446487	0.054398	0.0422724	0.0641113	0.0457288	0.0641414	0.053832	0.105738	0.0527631
0.0660998	0.106194	0.0741909	0.0665977	0.0790227	0.0829646	0.0838144	0.0717294	0.0808768	0.0908668	0.0696156	0.0614781	0.0645605	0.0999582	0.106422	0.0888265	0.0831091	0.0932316	0.0619587	0.0881011	0.0866657	0.0990713	0.0788191	0.0804867	0.0647988	0.0653871	0.05357	0.0646058	0.0608834
Biotin-Streptavdin
0.887065	0.900764	0.898444	0.891717	0.79841	0.913656	0.883322	0.894237	0.874454	0.900414	0.908247	0.920895	0.896917	0.845907	0.845261	0.913607	0.835196	0.88661	0.922057	0.924338	0.93194	0.905108	0.857965	0.910276	0.871592	0.614884	0.903964	0.928634	0.941479	0.921989	0.871757	0.875995	0.942164	0.918383	0.890504	0.883898
0.89122	0.888962	0.885938	0.940889	0.935943	0.917252	0.938871	0.922329	0.907261	0.902686	0.926008	0.940103	0.950093	0.940736	0.867108	0.86516	0.931016	0.946535	0.893127	0.939558	0.91384	0.907624	0.931936	0.945755	0.941019	0.925745	0.943292	0.913425	0.90476	0.910288	0.879867	0.865888	0.940469	0.885056	0.93953	0.893788
0.958017	0.941099	0.931874	0.942035	0.897788	0.951929	0.93682	0.96071	0.950447	0.939441	0.962014	0.936394	0.920369	0.936569	0.957894	0.956524	0.919116	0.956036	0.953428	0.916496	0.957726	0.958472	0.960982	0.951137	0.969346	0.95492	0.82527	0.861717	0.938252	0.961769	0.96329	0.955594	0.862396	0.870943	0.875675	0.887392
0.87111	0.857796	0.931171	0.898032	0.923507	0.889218	0.924459	0.92273	0.93132	0.931779	0.92837	0.909677	0.910648	0.913183	0.930874	0.932123	0.931522	0.905718	0.926112	0.929506	0.885175	0.926589	0.924318	0.931042	0.924446	0.915832	0.871242	0.874938	0.930742	0.93126	0.930343	0.925507	0.869719	0.890948	0.896324	0.907623
0.906021	0.942686	0.908426	0.909162	0.960815	0.970509	0.958342	0.941603	0.954442	0.946505	0.965571	0.955583	0.943465	0.968325	0.968572	0.944375	0.967703	0.888704	0.946208	0.928526	0.970431	0.936667	0.975024	0.970366	0.982592	0.960949	0.981751	0.95971	0.979182	0.98041	0.976596	0.977968	0.979702	0.965239	0.974241	0.964282
0.931402	0.969142	0.958172	0.973471	0.946907	0.935064	0.988722	0.974376	0.970822	0.987711	0.988791	0.958789	0.974915	0.985305	0.917245	0.931046	0.91934	0.922557	0.989476	0.989061	0.988246	0.975855	0.912958	0.920579	0.920897	0.917119	0.981269	0.98107	0.98576	0.979264	0.920728	0.92003	0.971754	0.977556	0.964223	0.964651
0.913532	0.960283	0.915856	0.921996	0.942717	0.926895	0.945628	0.950906	0.956076	0.95339	0.895642	0.92912	0.942392	0.950106	0.855982	0.943023	0.923936	0.956936	0.924869	0.910666	0.930457	0.937511	0.94986	0.955197	0.884179	0.952112	0.912913	0.951933	0.950175	0.952555	0.944428	0.941477	0.951709	0.931787	0.918708	0.936932
0.917462	0.945337	0.929833	0.926625	0.938437	0.935639	0.885974	0.886847	0.943644	0.929311	0.942665	0.9415	0.945331	0.939227	0.947303	0.949309	0.908334	0.945173	0.937994	0.912153	0.900149	0.908623	0.931225	0.913812	0.94219	0.944708	0.941726	0.935181	0.890828	0.879325	0.926184	0.940125	0.947425	0.901389	0.936674	0.946105
0.896337	0.912249	0.919946	0.94925	0.934433	0.887743	0.693244	0.896523	0.948241	0.951448	0.946686	0.942474	0.919428	0.669996	0.912275	0.934667	0.935879	0.941354	0.935159	0.866741	0.937972	0.947539	0.926183	0.936568	0.934785	0.868257	0.936941	0.939225	0.938249	0.930581	0.945585	0.941803	0.936402	0.92495	0.925797	0.905487
