# Supplementary material for: Mechanically transduced immunosorbent assay to measure protein-protein interactions
Source: eLife. 2021 Sep 28;10:e67525. doi: 10.7554/eLife.67525 (PMC8479797; doi:10.7554/eLife.67525)
Supplement: Figure 2—source data 1. [file elife-67525-fig2-data1.xlsx]

## Sheet: Sheet1
H3K4me3
0.408647	0.292271	0.319281	0.226559	0.351276	0.355201	0.358585	0.325038	0.327	0.426887	0.20932	0.225148	0.249899	0.403331	0.284975	0.216958	0.221594	0.376276	0.314569	0.196734	0.225179	0.196167	0.34134	0.339259	0.222763	0.22257	0.223124	0.226328	0.30473	0.321861	0.247215	0.197874	0.165177	0.234104	0.210779
0.420268	0.163811	0.289265	0.217386	0.375266	0.223032	0.30488	0.230335	0.349488	0.322613	0.200036	0.247524	0.303162	0.254089	0.312939	0.238248	0.243339	0.413198	0.345437	0.216039	0.247276	0.215416	0.374834	0.37255	0.244622	0.24441	0.245018	0.248536	0.334632	0.353444	0.271474	0.217291	0.181385	0.257076	0.231462
0.403057	0.5024	0.35163	0.409974	0.27525	0.412907	0.339353	0.353286	0.365148	0.273605	0.284201	0.280125	0.396096	0.384553	0.395433	0.34582	0.361829	0.265435	0.326664	0.409208	0.330444	0.221588	0.364255	0.3424	0.362231	0.470114	0.276389	0.299064	0.340783	0.29354	0.236863	0.246653	0.23121	0.332896	0.40589
0.252388	0.182743	0.26807	0.230594	0.19004	0.093269	0.308398	0.38649	0.243777	0.167082	0.297009	0.298012	0.152263	0.211304	0.176604	0.137873	0.133055	0.202131	0.169729	0.099978	0.153341	0.300256	0.174421	0.079772	0.238288	0.230994	0.239088	0.09172	0.185336	0.082004	0.170902	0.079703	0.161562	0.151044	0.239819
0.280187	0.288141	0.412595	0.400517	0.383715	0.29494	0.265593	0.265997	0.273765	0.187474	0.14261	0.261665	0.325869	0.364117	0.258856	0.098413	0.315397	0.310108	0.227239	0.22223	0.18703	0.191412	0.323334	0.341755	0.252046	0.349454	0.260319	0.389767	0.248976	0.238132	0.150062	0.249123	0.281512	0.226772	0.177437
0.448739	0.409744	0.282956	0.254447	0.161827	0.197193	0.264586	0.264894	0.104144	0.152846	0.156828	0.150615	0.174904	0.073843	0.215131	0.196099	0.186875	0.264367	0.132514	0.162771	0.139383	0.152266	0.146087	0.195439	0.108609	0.121501	0.12718	0.140836	0.093629	0.131318	0.148334	0.129482	0.116611	0.177797	0.126717
0.231787	0.152025	0.217773	0.102142	0.163155	0.145325	0.189141	0.111252	0.155629	0.151623	0.144044	0.200611	0.26923	0.256857	0.160295	0.10096	0.168752	0.115024	0.141215	0.192284	0.111651	0.129047	0.282041	0.137388	0.162138	0.093201	0.115255	0.153844	0.198742	0.09463	0.124324	0.144486	0.113653	0.127727	0.093817
0.254315	0.378715	0.23211	0.267712	0.204072	0.298633	0.419308	0.146831	0.37298	0.399043	0.218179	0.286898	0.307011	0.33303	0.228941	0.099983	0.165496	0.261456	0.169283	0.265225	0.144359	0.131893	0.099547	0.279505	0.291548	0.146882	0.150005	0.205385	0.176452	0.139397	0.184721	0.091787	0.185658	0.162276	0.184447
0.280031	0.315484	0.240478	0.328465	0.138754	0.166553	0.232339	0.210547	0.143498	0.18533	0.145614	0.14223	0.162846	0.194599	0.124765	0.174117	0.103415	0.102052	0.085972	0.146978	0.130091	0.061532	0.095754	0.088226	0.100834	0.150432	0.112577	0.141896	0.096905	0.105205	0.145158	0.093746	0.116505	0.131308	0.115952
0.283262	0.342338	0.132458	0.196457	0.081516	0.163675	0.159851	0.155292	0.200259	0.102511	0.1182	0.182048	0.159791	0.122452	0.13832	0.339553	0.114042	0.129064	0.217249	0.169295	0.140498	0.13668	0.189523	0.164673	0.208113	0.154054	0.177639	0.119346	0.156865	0.090366	0.193959	0.143823	0.120037	0.177817	0.138544
0.227043	0.19883	0.173062	0.234939	0.174549	0.118874	0.200956	0.189144	0.170073	0.131685	0.156827	0.160729	0.130407	0.124169	0.237491	0.136846	0.129902	0.314105	0.137671	0.185409	0.165654	0.102498	0.099883	0.135031	0.110427	0.121282	0.174081	0.134947	0.111806	0.135404	0.183708	0.142684	0.098497	0.109336	0.115691
0.27943	0.186908	0.140162	0.20202	0.161078	0.144466	0.112769	0.102417	0.179818	0.180442	0.142943	0.119336	0.183556	0.190368	0.104073	0.123894	0.13843	0.164624	0.10103	0.108991	0.119905	0.106924	0.119825	0.128684	0.170305	0.141313	0.122517	0.163489	0.122235	0.092481	0.108873	0.077458	0.114046	0.214269	0.127857
0.138499	0.276644	0.252092	0.136874	0.181632	0.275743	0.214127	0.091615	0.159034	0.181405	0.192949	0.330363	0.143584	0.153469	0.10251	0.133632	0.216854	0.185114	0.205974	0.160565	0.133521	0.182925	0.204583	0.228685	0.149387	0.176769	0.12634	0.134467	0.193295	0.250811	0.109999	0.239327	0.130421	0.408668	0.527922
0.164881	0.233534	0.232601	0.270955	0.174923	0.312296	0.186938	0.378846	0.254948	0.301576	0.250776	0.128997	0.136047	0.214046	0.116394	0.282644	0.124286	0.246326	0.151078	0.219115	0.218391	0.113738	0.092219	0.273065	0.116943	0.184161	0.16835	0.215207	0.240717	0.189724	0.174875	0.174491	0.158748	0.109973	0.165913
0.268306	0.334636	0.24799	0.394523	0.236739	0.285331	0.144508	0.360057	0.259541	0.35668	0.184572	0.352696	0.1876	0.395162	0.262442	0.347406	0.250011	0.278746	0.1947	0.200999	0.324996	0.212446	0.341762	0.41824	0.1729	0.308791	0.189132	0.337874	0.209266	0.177482	0.211587	0.275389	0.223666	0.223474	0.178285
0.28922	0.298452	0.255646	0.309987	0.290033	0.316872	0.396314	0.334984	0.209727	0.441553	0.448241	0.227222	0.363288	0.18526	0.403093	0.295318	0.387742	0.409683	0.273652	0.368299	0.215155	0.334602	0.384065	0.120536	0.225025	0.228822	0.298793	0.256646	0.360154	0.256933	0.27604	0.197297	0.183086	0.292096	0.322102
0.392139	0.277472	0.195252	0.324858	0.332541	0.179995	0.384577	0.16704	0.339001	0.180316	0.239092	0.28649	0.242064	0.222544	0.179447	0.198899	0.135725	0.237045	0.183043	0.203656	0.105745	0.174957	0.2295	0.19134	0.222468	0.141073	0.257534	0.20032	0.148067	0.176757	0.160103	0.210233	0.129701	0.136206	0.119992
0.186021	0.211572	0.284346	0.335899	0.219932	0.324921	0.243744	0.227031	0.107979	0.263663	0.239471	0.219265	0.125997	0.167952	0.167816	0.201444	0.214199	0.207189	0.177677	0.182679	0.174756	0.195501	0.153238	0.291953	0.222392	0.154619	0.282036	0.132042	0.129899	0.272961	0.117866	0.142072	0.101578	0.350654	0.337956
0.373324	0.313247	0.210124	0.373202	0.231334	0.393328	0.27268	0.527933	0.297269	0.351214	0.24676	0.379336	0.422248	0.43108	0.341412	0.504747	0.308681	0.424918	0.326511	0.370716	0.242807	0.378055	0.241996	0.474453	0.128916	0.26776	0.20288	0.272376	0.185068	0.307996	0.119614	0.270668	0.212121	0.189674	0.234679
0.269747	0.429511	0.127782	0.379099	0.267039	0.217832	0.373707	0.190306	0.242594	0.214166	0.170251	0.244076	0.182865	0.232768	0.168563	0.373315	0.337004	0.193306	0.27315	0.305771	0.183453	0.252572	0.205995	0.251141	0.190843	0.215643	0.292894	0.240051	0.221486	0.250817	0.106216	0.18166	0.157666	0.147558	0.204045
0.385705	0.350559	0.240924	0.176582	0.447459	0.299988	0.264699	0.190081	0.315514	0.188815	0.318502	0.305257	0.401381	0.381982	0.304351	0.19134	0.331967	0.319773	0.365086	0.203453	0.184718	0.191864	0.19174	0.327091	0.254334	0.238653	0.322229	0.25005	0.464215	0.167863	0.180694	0.306944	0.158136	0.188201	0.388719
0.40986	0.211797	0.280604	0.456527	0.325898	0.201492	0.28908	0.412256	0.289326	0.358256	0.275921	0.257093	0.260873	0.202259	0.32216	0.395304	0.180323	0.216837	0.175959	0.210652	0.239265	0.296742	0.167524	0.281578	0.230321	0.146212	0.233155	0.185252	0.152776	0.238123	0.18217	0.229001	0.150976	0.169509	0.145163
0.304561	0.350491	0.197457	0.281732	0.352037	0.251682	0.201462	0.370835	0.315551	0.340863	0.249943	0.425702	0.235482	0.273743	0.235697	0.235554	0.258335	0.298416	0.214716	0.495437	0.500396	0.217242	0.221643	0.240812	0.222925	0.311875	0.327722	0.27935	0.170059	0.28343	0.23522	0.329231	0.324366	0.32132	0.222262
0.381787	0.337971	0.281297	0.382328	0.356273	0.478775	0.450499	0.357084	0.343785	0.375228	0.332825	0.357918	0.205063	0.402584	0.447713	0.353793	0.294024	0.377561	0.16261	0.316489	0.126712	0.219728	0.201577	0.205393	0.23268	0.232812	0.235445	0.220465	0.14327	0.001576	0.067473	0.208437	0.343319	0.397181	0.367131
H3K4me2
0.408647	0.292271	0.319281	0.226559	0.351276	0.355201	0.358585	0.325038	0.327	0.426887	0.20932	0.225148	0.249899	0.403331	0.284975	0.216958	0.221594	0.376276	0.314569	0.196734	0.225179	0.196167	0.34134	0.339259	0.222763	0.22257	0.223124	0.226328	0.30473	0.321861	0.247215	0.197874	0.165177	0.234104	0.210779
0.420268	0.163811	0.289265	0.217386	0.375266	0.223032	0.30488	0.230335	0.349488	0.322613	0.200036	0.247524	0.303162	0.254089	0.312939	0.238248	0.243339	0.413198	0.345437	0.216039	0.247276	0.215416	0.374834	0.37255	0.244622	0.24441	0.245018	0.248536	0.334632	0.353444	0.271474	0.217291	0.181385	0.257076	0.231462
0.403057	0.5024	0.35163	0.409974	0.27525	0.412907	0.339353	0.353286	0.365148	0.273605	0.284201	0.280125	0.396096	0.384553	0.395433	0.34582	0.361829	0.265435	0.326664	0.409208	0.330444	0.221588	0.364255	0.3424	0.362231	0.470114	0.276389	0.299064	0.340783	0.29354	0.236863	0.246653	0.23121	0.332896	0.40589
0.252388	0.182743	0.26807	0.230594	0.19004	0.093269	0.308398	0.38649	0.243777	0.167082	0.297009	0.298012	0.152263	0.211304	0.176604	0.137873	0.133055	0.202131	0.169729	0.099978	0.153341	0.300256	0.174421	0.079772	0.238288	0.230994	0.239088	0.09172	0.185336	0.082004	0.170902	0.079703	0.161562	0.151044	0.239819
0.280187	0.288141	0.412595	0.400517	0.383715	0.29494	0.265593	0.265997	0.273765	0.187474	0.14261	0.261665	0.325869	0.364117	0.258856	0.098413	0.315397	0.310108	0.227239	0.22223	0.18703	0.191412	0.323334	0.341755	0.252046	0.349454	0.260319	0.389767	0.248976	0.238132	0.150062	0.249123	0.281512	0.226772	0.177437
0.448739	0.409744	0.282956	0.254447	0.161827	0.197193	0.264586	0.264894	0.104144	0.152846	0.156828	0.150615	0.174904	0.073843	0.215131	0.196099	0.186875	0.264367	0.132514	0.162771	0.139383	0.152266	0.146087	0.195439	0.108609	0.121501	0.12718	0.140836	0.093629	0.131318	0.148334	0.129482	0.116611	0.177797	0.126717
0.231787	0.152025	0.217773	0.102142	0.163155	0.145325	0.189141	0.111252	0.155629	0.151623	0.144044	0.200611	0.26923	0.256857	0.160295	0.10096	0.168752	0.115024	0.141215	0.192284	0.111651	0.129047	0.282041	0.137388	0.162138	0.093201	0.115255	0.153844	0.198742	0.09463	0.124324	0.144486	0.113653	0.127727	0.093817
0.254315	0.378715	0.23211	0.267712	0.204072	0.298633	0.419308	0.146831	0.37298	0.399043	0.218179	0.286898	0.307011	0.33303	0.228941	0.099983	0.165496	0.261456	0.169283	0.265225	0.144359	0.131893	0.099547	0.279505	0.291548	0.146882	0.150005	0.205385	0.176452	0.139397	0.184721	0.091787	0.185658	0.162276	0.184447
0.280031	0.315484	0.240478	0.328465	0.138754	0.166553	0.232339	0.210547	0.143498	0.18533	0.145614	0.14223	0.162846	0.194599	0.124765	0.174117	0.103415	0.102052	0.085972	0.146978	0.130091	0.061532	0.095754	0.088226	0.100834	0.150432	0.112577	0.141896	0.096905	0.105205	0.145158	0.093746	0.116505	0.131308	0.115952
0.283262	0.342338	0.132458	0.196457	0.081516	0.163675	0.159851	0.155292	0.200259	0.102511	0.1182	0.182048	0.159791	0.122452	0.13832	0.339553	0.114042	0.129064	0.217249	0.169295	0.140498	0.13668	0.189523	0.164673	0.208113	0.154054	0.177639	0.119346	0.156865	0.090366	0.193959	0.143823	0.120037	0.177817	0.138544
0.227043	0.19883	0.173062	0.234939	0.174549	0.118874	0.200956	0.189144	0.170073	0.131685	0.156827	0.160729	0.130407	0.124169	0.237491	0.136846	0.129902	0.314105	0.137671	0.185409	0.165654	0.102498	0.099883	0.135031	0.110427	0.121282	0.174081	0.134947	0.111806	0.135404	0.183708	0.142684	0.098497	0.109336	0.115691
0.27943	0.186908	0.140162	0.20202	0.161078	0.144466	0.112769	0.102417	0.179818	0.180442	0.142943	0.119336	0.183556	0.190368	0.104073	0.123894	0.13843	0.164624	0.10103	0.108991	0.119905	0.106924	0.119825	0.128684	0.170305	0.141313	0.122517	0.163489	0.122235	0.092481	0.108873	0.077458	0.114046	0.214269	0.127857
0.138499	0.276644	0.252092	0.136874	0.181632	0.275743	0.214127	0.091615	0.159034	0.181405	0.192949	0.330363	0.143584	0.153469	0.10251	0.133632	0.216854	0.185114	0.205974	0.160565	0.133521	0.182925	0.204583	0.228685	0.149387	0.176769	0.12634	0.134467	0.193295	0.250811	0.109999	0.239327	0.130421	0.408668	0.527922
0.164881	0.233534	0.232601	0.270955	0.174923	0.312296	0.186938	0.378846	0.254948	0.301576	0.250776	0.128997	0.136047	0.214046	0.116394	0.282644	0.124286	0.246326	0.151078	0.219115	0.218391	0.113738	0.092219	0.273065	0.116943	0.184161	0.16835	0.215207	0.240717	0.189724	0.174875	0.174491	0.158748	0.109973	0.165913
0.268306	0.334636	0.24799	0.394523	0.236739	0.285331	0.144508	0.360057	0.259541	0.35668	0.184572	0.352696	0.1876	0.395162	0.262442	0.347406	0.250011	0.278746	0.1947	0.200999	0.324996	0.212446	0.341762	0.41824	0.1729	0.308791	0.189132	0.337874	0.209266	0.177482	0.211587	0.275389	0.223666	0.223474	0.178285
0.28922	0.298452	0.255646	0.309987	0.290033	0.316872	0.396314	0.334984	0.209727	0.441553	0.448241	0.227222	0.363288	0.18526	0.403093	0.295318	0.387742	0.409683	0.273652	0.368299	0.215155	0.334602	0.384065	0.120536	0.225025	0.228822	0.298793	0.256646	0.360154	0.256933	0.27604	0.197297	0.183086	0.292096	0.322102
0.392139	0.277472	0.195252	0.324858	0.332541	0.179995	0.384577	0.16704	0.339001	0.180316	0.239092	0.28649	0.242064	0.222544	0.179447	0.198899	0.135725	0.237045	0.183043	0.203656	0.105745	0.174957	0.2295	0.19134	0.222468	0.141073	0.257534	0.20032	0.148067	0.176757	0.160103	0.210233	0.129701	0.136206	0.119992
0.186021	0.211572	0.284346	0.335899	0.219932	0.324921	0.243744	0.227031	0.107979	0.263663	0.239471	0.219265	0.125997	0.167952	0.167816	0.201444	0.214199	0.207189	0.177677	0.182679	0.174756	0.195501	0.153238	0.291953	0.222392	0.154619	0.282036	0.132042	0.129899	0.272961	0.117866	0.142072	0.101578	0.350654	0.337956
0.373324	0.313247	0.210124	0.373202	0.231334	0.393328	0.27268	0.527933	0.297269	0.351214	0.24676	0.379336	0.422248	0.43108	0.341412	0.504747	0.308681	0.424918	0.326511	0.370716	0.242807	0.378055	0.241996	0.474453	0.128916	0.26776	0.20288	0.272376	0.185068	0.307996	0.119614	0.270668	0.212121	0.189674	0.234679
0.269747	0.429511	0.127782	0.379099	0.267039	0.217832	0.373707	0.190306	0.242594	0.214166	0.170251	0.244076	0.182865	0.232768	0.168563	0.373315	0.337004	0.193306	0.27315	0.305771	0.183453	0.252572	0.205995	0.251141	0.190843	0.215643	0.292894	0.240051	0.221486	0.250817	0.106216	0.18166	0.157666	0.147558	0.204045
0.385705	0.350559	0.240924	0.176582	0.447459	0.299988	0.264699	0.190081	0.315514	0.188815	0.318502	0.305257	0.401381	0.381982	0.304351	0.19134	0.331967	0.319773	0.365086	0.203453	0.184718	0.191864	0.19174	0.327091	0.254334	0.238653	0.322229	0.25005	0.464215	0.167863	0.180694	0.306944	0.158136	0.188201	0.388719
0.40986	0.211797	0.280604	0.456527	0.325898	0.201492	0.28908	0.412256	0.289326	0.358256	0.275921	0.257093	0.260873	0.202259	0.32216	0.395304	0.180323	0.216837	0.175959	0.210652	0.239265	0.296742	0.167524	0.281578	0.230321	0.146212	0.233155	0.185252	0.152776	0.238123	0.18217	0.229001	0.150976	0.169509	0.145163
0.304561	0.350491	0.197457	0.281732	0.352037	0.251682	0.201462	0.370835	0.315551	0.340863	0.249943	0.425702	0.235482	0.273743	0.235697	0.235554	0.258335	0.298416	0.214716	0.495437	0.500396	0.217242	0.221643	0.240812	0.222925	0.311875	0.327722	0.27935	0.170059	0.28343	0.23522	0.329231	0.324366	0.32132	0.222262
0.381787	0.337971	0.281297	0.382328	0.356273	0.478775	0.450499	0.357084	0.343785	0.375228	0.332825	0.357918	0.205063	0.402584	0.447713	0.353793	0.294024	0.377561	0.16261	0.316489	0.126712	0.219728	0.201577	0.205393	0.23268	0.232812	0.235445	0.220465	0.14327	0.001576	0.067473	0.208437	0.343319	0.397181	0.367131
H3K4me
0.144007	0.207104	0.129717	0.132073	0.143113	0.174632	0.148863	0.198898	0.192476	0.170826	0.0972263	0.10319	0.0734464	0.105864	0.116161	0.11524	0.13494	0.130822	0.165372	0.156829	0.0934192	0.143066	0.152136	0.117739	0.13417	0.102766	0.151303	0.198354	0.1637	0.129828	0.118364	0.0257139	0.103937	0.120593	0.196512
0.131422	0.286962	0.176342	0.241054	0.158182	0.196307	0.0956163	0.106195	0.069339	0.175995	0.109543	0.171454	0.17991	0.10044	0.120506	0.211187	0.154644	0.129868	0.136651	0.126097	0.0805035	0.106509	0.0746925	0.148407	0.0986187	0.112716	0.163494	0.157258	0.0780724	0.0866106	0.156418	0.147131	0.0788684	0.166332	0.0671216
0.0913071	0.132381	0.147788	0.142839	0.20027	0.36353	0.161406	0.153534	0.0872711	0.146496	0.0999725	0.188973	0.159215	0.221017	0.108213	0.132395	0.125905	0.217277	0.10976	0.231613	0.100158	0.154156	0.0743142	0.116081	0.124538	0.0525435	0.0901818	0.164439	0.121734	0.100936	0.117953	0.108914	0.0559268	0.149564	0.0568088
0.204774	0.135499	0.142156	0.107236	0.189469	0.112797	0.17378	0.190475	0.100138	0.104232	0.171957	0.178405	0.0670087	0.144098	0.121404	0.117283	0.138406	0.131171	0.116686	0.0719071	0.226633	0.166493	0.154464	0.126919	0.160141	0.137707	0.160798	0.132758	0.176321	0.112204	0.137151	0.121578	0.124541	0.107125	0.0753634
0.0549103	0.133607	0.0866593	0.182798	0.17221	0.20342	0.162224	0.248732	0.243481	0.128711	0.106296	0.147153	0.174414	0.0815862	0.100838	0.123047	0.106037	0.141725	0.0970755	0.130211	0.152471	0.167564	0.108293	0.0955034	0.143239	0.13162	0.0981178	0.158134	0.0924754	0.136481	0.177635	0.153731	0.145613	0.123247	0.137115
0.217026	0.180707	0.131056	0.109085	0.182959	0.191239	0.12909	0.127516	0.128226	0.114115	0.186484	0.153384	0.11363	0.140801	0.108103	0.115194	0.112844	0.132754	0.149379	0.117793	0.131343	0.134922	0.144709	0.135343	0.104623	0.164838	0.127744	0.111648	0.107177	0.221195	0.107298	0.119169	0.0902321	0.214839	0.108746
0.0648831	0.205928	0.0791203	0.173803	0.0715809	0.211378	0.134345	0.13642	0.13642	0.150895	0.102658	0.132307	0.137045	0.181009	0.07351	0.130756	0.160227	0.386517	0.0444347	0.199632	0.305273	0.185474	0.154925	0.152719	0.157689	0.117537	0.0330155	0.0726545	0.0935555	0.131856	0.0769838	0.142439	0.118517	0.123619	0.112559
0.116093	0.126851	0.10361	0.151264	0.160083	0.138521	0.134541	0.155785	0.226333	0.132835	0.182291	0.0920271	0.0874069	0.125744	0.1117	0.122521	0.125372	0.174261	0.169736	0.245145	0.203399	0.109982	0.166621	0.147449	0.119637	0.108912	0.117699	0.103661	0.224067	0.0764963	0.132904	0.105504	0.162768	0.162525	0.145043
0.182892	0.21732	0.131382	0.240772	0.151965	0.152332	0.216003	0.163704	0.162869	0.202717	0.180758	0.243945	0.131228	0.154531	0.155768	0.220553	0.144538	0.12376	0.132068	0.149817	0.0808869	0.1325	0.117439	0.131335	0.083427	0.0949186	0.16459	0.132914	0.10163	0.106416	0.0839249	0.0737701	0.140022	0.117643	0.0846981
0.091145	0.147813	0.12223	0.145013	0.171566	0.234426	0.192497	0.134571	0.140842	0.196658	0.277831	0.141459	0.105946	0.170142	0.189872	0.202727	0.0756089	0.0635657	0.16458	0.270933	0.0715871	0.18956	0.177468	0.171678	0.123655	0.124794	0.183414	0.193923	0.0996761	0.130244	0.0851616	0.142597	0.0799413	0.121322	0.0770421
0.179948	0.168172	0.0849423	0.131186	0.23515	0.155659	0.0834119	0.138918	0.147548	0.194699	0.199571	0.115591	0.220242	0.131039	0.241313	0.1493	0.199872	0.207456	0.162274	0.0709039	0.0917928	0.151832	0.157513	0.236927	0.105432	0.286387	0.124521	0.0949761	0.129917	0.179216	0.0902283	0.126445	0.123272	0.0867242	0.101998
0.165641	0.230966	0.148735	0.121899	0.101903	0.183794	0.166317	0.113097	0.175858	0.161767	0.147969	0.203235	0.26613	0.163852	0.138467	0.14098	0.144889	0.127819	0.174243	0.178422	0.149855	0.13313	0.0240603	0.0494958	0.113973	0.0353323	0.172272	0.108941	0.260965	0.171319	0.125048	0.18843	0.200441	0.165475	0.237614
0.0616151	0.116249	0.0996541	0.276969	0.155028	0.247827	0.0863918	0.0919452	0.141641	0.0988571	0.128531	0.232701	0.176627	0.172611	0.132153	0.185394	0.0869177	0.149209	0.130952	0.21875	0.176736	0.221338	0.187171	0.206841	0.145473	0.16686	0.176747	0.190145	0.117564	0.252933	0.0947866	0.169331	0.107765	0.234047	0.0681082
0.161793	0.162848	0.157476	0.169993	0.161038	0.131519	0.172039	0.150621	0.143793	0.176978	0.14813	0.148132	0.166535	0.151846	0.160436	0.205717	0.164606	0.167889	0.152104	0.211857	0.161683	0.147904	0.20149	0.151206	0.169195	0.136122	0.127024	0.147975	0.163183	0.1841	0.14968	0.148402	0.181562	0.146595	0.145493
0.140441	0.249738	0.136165	0.205633	0.131762	0.183385	0.182533	0.180105	0.11088	0.184573	0.126981	0.159215	0.117635	0.209813	0.170367	0.195286	0.203813	0.162974	0.114829	0.184763	0.14777	0.124388	0.126859	0.193442	0.148947	0.207928	0.147487	0.166453	0.13136	0.145591	0.128566	0.125594	0.112596	0.24465	0.129781
0.154424	0.18535	0.178038	0.236374	0.0806659	0.180578	0.214276	0.144372	0.146378	0.120425	0.215636	0.229314	0.145252	0.224107	0.138393	0.217353	0.164614	0.153366	0.157286	0.238967	0.218701	0.0836859	0.180257	0.108036	0.126523	0.167388	0.189116	0.117924	0.120793	0.153384	0.143526	0.173909	0.113066	0.145503	0.11967
0.218824	0.157467	0.140503	0.161894	0.220105	0.182402	0.136505	0.161869	0.132033	0.105988	0.174354	0.20288	0.201911	0.145545	0.176984	0.196417	0.195448	0.160355	0.130812	0.138367	0.117662	0.130353	0.135307	0.138753	0.156322	0.245559	0.108462	0.100063	0.127153	0.240047	0.222083	0.111914	0.292998	0.167328	0.186611
0.168623	0.25467	0.243231	0.166925	0.170967	0.224447	0.104688	0.115696	0.236754	0.263579	0.207644	0.233682	0.166168	0.158625	0.0715303	0.128766	0.148305	0.214787	0.115507	0.322051	0.110869	0.182904	0.198279	0.146261	0.107681	0.0931062	0.164443	0.20366	0.134406	0.20245	0.100656	0.169575	0.132874	0.130584	0.0838843
0.182209	0.234396	0.0910832	0.090458	0.16319	0.201067	0.122489	0.192711	0.183338	0.158164	0.17999	0.171279	0.215578	0.108783	0.133604	0.160517	0.269221	0.167705	0.190329	0.158264	0.155971	0.132158	0.138931	0.246459	0.178778	0.262381	0.164945	0.112665	0.204086	0.117939	0.151836	0.116374	0.162272	0.124984	0.28812
0.206199	0.109821	0.119197	0.143177	0.0875835	0.249943	0.21686	0.142631	0.171795	0.280903	0.164	0.301481	0.115191	0.146971	0.101189	0.191386	0.112651	0.244142	0.12791	0.515247	0.473788	0.094384	0.147746	0.105622	0.0812638	0.151089	0.0717773	0.203852	0.0954801	0.178381	0.0746922	0.210768	0.0895605	0.160193	0.0641322
0.146931	0.248564	0.101935	0.273273	0.181582	0.247488	0.263359	0.293731	0.131258	0.196343	0.144901	0.18103	0.0819046	0.146562	0.214273	0.208757	0.166149	0.223206	0.165552	0.233704	0.119681	0.16957	0.078594	0.151624	0.113165	0.16714	0.114727	0.165062	0.162412	0.140415	0.157202	0.181357	0.186033	0.1714	0.079302
0.261121	0.247073	0.142116	0.186785	0.298932	0.130606	0.253607	0.133781	0.173289	0.148829	0.158057	0.182125	0.224937	0.1538	0.156132	0.256163	0.31231	0.153939	0.0889133	0.15931	0.188881	0.255451	0.076162	0.139388	0.17293	0.175465	0.177811	0.100475	0.157537	0.131962	0.150216	0.116972	0.0888004	0.148892	0.126396
0.161279	0.242754	0.123261	0.219143	0.213765	0.230229	0.155823	0.309576	0.200808	0.170699	0.112953	0.172477	0.138602	0.136342	0.182169	0.241771	0.192178	0.196265	0.171476	0.132749	0.167109	0.151834	0.0870505	0.272868	0.144817	0.139829	0.103037	0.132684	0.0972709	0.203078	0.130113	0.157955	0.211433	0.195792	0.135352
0.170561	0.143685	0.176351	0.187538	0.291377	0.281976	0.219027	0.154389	0.230043	0.211776	0.131619	0.170793	0.157206	0.172775	0.153417	0.205184	0.136937	0.108199	0.118609	0.221527	0.167362	0.160812	0.12333	0.136664	0.141147	0.1713	0.113463	0.238835	0.172703	0.178886	0.160205	0.146404	0.169824	0.147804	0.203268
0.164458	0.165401	0.200677	0.300069	0.122414	0.115367	0.167367	0.125736	0.108843	0.203658	0.19137	0.109722	0.119721	0.162053	0.164102	0.16876	0.201733	0.286019	0.267798	0.26291	0.14012	0.219333	0.262283	0.207163	0.133944	0.208652	0.147783	0.223072	0.15025	0.197329	0.109662	0.113119	0.169445	0.13746	0.14066
0.178264	0.108243	0.293615	0.14741	0.0901727	0.257332	0.223271	0.141469	0.111887	0.289207	0.168848	0.310394	0.118597	0.151316	0.104181	0.197044	0.115982	0.25136	0.131691	0.530479	0.487795	0.0971743	0.152114	0.108745	0.0836662	0.155555	0.0738992	0.209879	0.0983028	0.183654	0.0769003	0.216999	0.0922082	0.164929	0.0660282
0.138104	0.301208	0.206509	0.193378	0.164172	0.252654	0.189163	0.159769	0.194766	0.115666	0.12778	0.0954271	0.18327	0.164712	0.194858	0.29556	0.156423	0.152211	0.257318	0.248345	0.0904733	0.121272	0.144193	0.240368	0.27451	0.236358	0.127315	0.169903	0.22547	0.142384	0.175856	0.164307	0.0861871	0.0957699	0.159046
0.202243	0.238228	0.1327	0.25962	0.102352	0.227563	0.135596	0.3483	0.0615232	0.257567	0.333044	0.264176	0.224957	0.182643	0.115958	0.119266	0.272594	0.155402	0.102744	0.143626	0.16213	0.135007	0.252176	0.26032	0.106261	0.127121	0.200356	0.227241	0.171453	0.115509	0.204088	0.128993	0.107978	0.163832	0.15382
0.241611	0.122345	0.127757	0.304516	0.290258	0.118536	0.167204	0.154682	0.202382	0.25225	0.21173	0.235122	0.226408	0.220621	0.129489	0.257351	0.160579	0.223563	0.108342	0.214718	0.159214	0.167726	0.256434	0.137096	0.184091	0.126368	0.13217	0.130143	0.134044	0.153829	0.166692	0.207407	0.185855	0.125697	0.16676
0.26807	0.296007	0.158554	0.239241	0.336453	0.114991	0.209598	0.208952	0.185234	0.170783	0.161238	0.209968	0.205876	0.136151	0.231452	0.193965	0.174136	0.182356	0.169553	0.243523	0.120871	0.228433	0.153144	0.115659	0.190098	0.178385	0.18203	0.164803	0.146633	0.133438	0.187012	0.105722	0.124344	0.145556	0.236159
0.196471	0.21231	0.184969	0.234894	0.134636	0.191301	0.207558	0.16883	0.248733	0.165676	0.232704	0.142772	0.139487	0.165802	0.164068	0.161804	0.221627	0.172558	0.172826	0.150237	0.225874	0.16318	0.134734	0.182734	0.194627	0.16007	0.218563	0.161366	0.299653	0.18641	0.261366	0.159115	0.199205	0.18179	0.171436
0.291129	0.168012	0.241828	0.231892	0.132035	0.122978	0.197317	0.174143	0.220273	0.165245	0.165784	0.127826	0.207312	0.133987	0.103498	0.146141	0.250897	0.210998	0.193553	0.249907	0.220666	0.158189	0.236817	0.200907	0.393114	0.187145	0.17283	0.282214	0.176822	0.151362	0.343438	0.149207	0.170717	0.214086	0.147629
0.101357	0.345334	0.307067	0.421658	0.392501	0.241455	0.271978	0.292743	0.309209	0.158645	0.273406	0.0993011	0.103009	0.189916	0.229849	0.211753	0.167047	0.207533	0.176932	0.153754	0.193587	0.17457	0.206108	0.150665	0.0817283	0.195889	0.130686	0.259817	0.146409	0.0870188	0.15558	0.19877	0.129312	0.143068	0.169182
0.321832	0.249474	0.206874	0.267689	0.108446	0.336307	0.130734	0.172328	0.150303	0.132074	0.233661	0.311071	0.218798	0.189157	0.172363	0.127103	0.174614	0.119336	0.309336	0.258592	0.213678	0.255616	0.181399	0.248531	0.193057	0.262935	0.111661	0.127845	0.135061	0.27146	0.234396	0.257158	0.153254	0.194136	0.154944
0.219107	0.229836	0.258896	0.18311	0.204934	0.228005	0.12224	0.212299	0.129254	0.233972	0.0676831	0.237944	0.199635	0.288542	0.168371	0.380264	0.22105	0.290503	0.160547	0.193309	0.2406	0.243617	0.184465	0.379289	0.188951	0.175903	0.235038	0.215178	0.199121	0.343661	0.116655	0.161115	0.114566	0.0985525	0.0956776
0.208632	0.193088	0.250975	0.341395	0.40461	0.271421	0.231517	0.216947	0.138012	0.432994	0.126843	0.312902	0.238022	0.22432	0.154836	0.140026	0.174434	0.236338	0.275179	0.216826	0.222925	0.30733	0.222615	0.250169	0.189388	0.168407	0.116748	0.169463	0.102914	0.205071	0.181571	0.136732	0.0919989	0.0995706	0.201766
0.171837	0.343422	0.153534	0.462102	0.260349	0.229402	0.350291	0.355675	0.298542	0.188832	0.262438	0.320936	0.237455	0.287704	0.232573	0.248541	0.242911	0.258103	0.205404	0.265786	0.22224	0.202719	0.160442	0.164649	0.151283	0.177387	0.142669	0.173168	0.144526	0.193615	0.125458	0.20569	0.0600643	0.12883	0.296988
0.663304	0.424864	0.324929	0.3655	0.329347	0.230591	0.1122	0.200779	0.146945	0.232688	0.256318	0.368253	0.177862	0.279347	0.206574	0.296455	0.182109	0.177341	0.234228	0.137916	0.249851	0.167334	0.153849	0.185522	0.188729	0.195478	0.23402	0.124462	0.168196	0.185401	0.246117	0.331674	0.115966	0.110462	0.192834
0.108279	0.262622	0.303669	0.218009	0.205949	0.274125	0.155748	0.285572	0.166628	0.204649	0.237847	0.201177	0.312246	0.36879	0.225677	0.317397	0.158945	0.304577	0.215407	0.259864	0.321234	0.167269	0.267455	0.176632	0.161374	0.250627	0.156034	0.37329	0.143	0.254787	0.184634	0.290204	0.285162	0.409641	0.286844
0.293291	0.234921	0.60417	0.283268	0.463468	0.298298	0.307288	0.510002	0.49452	0.293569	0.101505	0.345976	0.131729	0.192378	0.217487	0.357586	0.281526	0.146323	0.328273	0.180898	0.583534	0.180572	0.221532	0.148358	0.242073	0.140996	0.0643128	0.158735	0.0735202	0.170093	0.138525	0.183879	0.0712574	0.229006	0.104425
0.232329	0.278005	0.223821	0.302663	0.227876	0.299335	0.277341	0.239737	0.243695	0.273655	0.305807	0.228199	0.265244	0.239524	0.272084	0.284381	0.335074	0.31651	0.202603	0.227469	0.266818	0.337417	0.248359	0.329634	0.212746	0.251292	0.173995	0.358863	0.190212	0.301826	0.172449	0.213154	0.126008	0.200499	0.1698
H3
0.0658921	0.181247	0.196704	0.153614	0.319578	0.198551	0.25772	0.181537	0.0723972	0.177119	0.179496	0.104914	0.186722	0.147006	0.10136	0.103701	0.0820119	0.180703	0.154295	0.137943	0.116465	0.15989	0.133102	0.20111	0.0707622	0.168373	0.0724694	0.120002	0.086357	0.102617	0.115175	0.102839	0.129501	0.141008	0.170575
0.220159	0.239289	0.111362	0.205524	0.177066	0.136724	0.128172	0.134928	0.108008	0.127994	0.134957	0.118667	0.131541	0.142642	0.122356	0.143816	0.211749	0.153867	0.0950896	0.232707	0.175951	0.204517	0.158855	0.11217	0.185134	0.14038	0.174733	0.146079	0.134292	0.16579	0.134326	0.187191	0.136217	0.174788	0.152375
0.200135	0.21937	0.108246	0.0843303	0.0791331	0.158792	0.195656	0.148176	0.123096	0.130126	0.133629	0.138333	0.114003	0.130307	0.0897874	0.199852	0.0755392	0.176699	0.160962	0.173989	0.0901216	0.0982171	0.165057	0.179642	0.226894	0.143475	0.117038	0.13844	0.172675	0.171012	0.170745	0.212792	0.121122	0.261368	0.150129
0.255421	0.289732	0.142748	0.216962	0.13601	0.199005	0.101877	0.146923	0.113351	0.139464	0.196973	0.206103	0.183499	0.115224	0.0688424	0.141939	0.113673	0.123291	0.225239	0.118095	0.143695	0.14057	0.135417	0.172245	0.128418	0.162056	0.0853819	0.139278	0.082934	0.190869	0.118718	0.130002	0.0936048	0.0734164	0.0852218
0.207935	0.194797	0.294497	0.274156	0.135464	0.153471	0.316899	0.158183	0.24812	0.157503	0.166688	0.262005	0.0772943	0.177283	0.120997	0.163267	0.108349	0.119848	0.209867	0.141163	0.152209	0.109213	0.072506	0.115358	0.0652395	0.206218	0.0771414	0.140123	0.1647	0.178441	0.119753	0.135547	0.142224	0.152764	0.139776
0.150112	0.145859	0.0999057	0.141489	0.131861	0.186119	0.0915099	0.164372	0.107525	0.124968	0.115487	0.149185	0.110661	0.162287	0.151515	0.120289	0.111277	0.13091	0.125863	0.125779	0.0791254	0.123395	0.112557	0.122615	0.121562	0.15945	0.149058	0.10607	0.119835	0.108602	0.149586	0.141602	0.139803	0.10126	0.113477
0.279467	0.367571	0.31155	0.130332	0.182375	0.191298	0.102408	0.108002	0.101452	0.172797	0.102074	0.112415	0.105321	0.203338	0.143096	0.173037	0.146141	0.19885	0.263682	0.241052	0.186671	0.156159	0.198011	0.193366	0.151646	0.171662	0.0926463	0.196082	0.118312	0.173468	0.142225	0.169671	0.205716	0.115558	0.126461
0.25677	0.171299	0.116575	0.121737	0.0894943	0.213211	0.115928	0.127123	0.0554113	0.0925761	0.113895	0.0775423	0.14342	0.206444	0.106303	0.0874229	0.11222	0.133717	0.106705	0.147272	0.0824439	0.0715164	0.0754363	0.102933	0.0916777	0.098439	0.140347	0.098361	0.136623	0.0885971	0.067215	0.0837192	0.102584	0.076257	0.107473
0.162246	0.292914	0.110806	0.125911	0.0640271	0.222943	0.140889	0.141243	0.121856	0.129673	0.0874243	0.123059	0.129883	0.166837	0.125171	0.0745163	0.0742192	0.110594	0.084619	0.132002	0.0791816	0.12811	0.113713	0.0708753	0.127051	0.108525	0.086974	0.0872799	0.148984	0.114993	0.0771791	0.101237	0.0797301	0.140799	0.142766
0.187573	0.185605	0.157396	0.126056	0.104088	0.10145	0.130567	0.126309	0.0959633	0.151463	0.102272	0.172768	0.120626	0.126509	0.0779624	0.148201	0.104867	0.107968	0.106484	0.119596	0.0912188	0.106721	0.117809	0.0953773	0.0697411	0.08707	0.0754887	0.070005	0.0802819	0.0756859	0.156582	0.0895581	0.0614081	0.0694538	0.108375
0.139245	0.169857	0.0968618	0.135804	0.134964	0.170465	0.102579	0.10928	0.130718	0.127992	0.130817	0.115783	0.106986	0.0810489	0.0641063	0.114717	0.0567093	0.145317	0.0970114	0.0810699	0.0765148	0.102672	0.0506146	0.0780635	0.0665198	0.0895475	0.112341	0.0989217	0.0524025	0.0657084	0.077925	0.101582	0.0648638	0.0915807	0.068004
0.180172	0.164311	0.0729061	0.211028	0.0792113	0.199589	0.120728	0.276642	0.117492	0.133326	0.0665105	0.0995216	0.102842	0.083921	0.101123	0.146543	0.181572	0.0857716	0.0614115	0.0900889	0.133373	0.116905	0.116719	0.129531	0.091342	0.120177	0.0721057	0.119051	0.0946002	0.111268	0.115486	0.130642	0.119577	0.104083	0.0845514
0.185211	0.0939792	0.156779	0.18708	0.12057	0.162967	0.129826	0.170845	0.0881354	0.111152	0.0676913	0.0668793	0.141555	0.145167	0.0923424	0.142189	0.135196	0.114803	0.157717	0.0997266	0.0629529	0.168557	0.100263	0.155781	0.0784924	0.127813	0.155432	0.0908617	0.0787401	0.0895837	0.176669	0.128208	0.0533853	0.10375	0.130135
0.137049	0.241797	0.0902367	0.206581	0.0902827	0.229729	0.133407	0.248793	0.184042	0.18016	0.0909454	0.192213	0.107927	0.15311	0.0959026	0.134535	0.106129	0.166674	0.151197	0.180711	0.134346	0.133741	0.186282	0.149363	0.138024	0.107651	0.144301	0.112676	0.13514	0.178355	0.0663855	0.0893664	0.0947451	0.0906072	0.124791
0.120686	0.1879	0.203936	0.144279	0.176894	0.119002	0.237683	0.199178	0.148763	0.256162	0.144222	0.153445	0.107247	0.117648	0.114481	0.215536	0.114131	0.186667	0.139974	0.138256	0.099294	0.127757	0.0824982	0.0893499	0.173503	0.131517	0.0753084	0.120229	0.115976	0.123561	0.0719868	0.0658343	0.0588464	0.154121	0.212393
0.215342	0.264093	0.204412	0.172867	0.185966	0.163957	0.153516	0.147104	0.137267	0.156599	0.0855714	0.188942	0.183413	0.159806	0.124767	0.202431	0.129449	0.118272	0.150403	0.16109	0.117619	0.0977435	0.136431	0.119698	0.158756	0.24242	0.14049	0.159286	0.0810467	0.0674164	0.0678972	0.130652	0.130929	0.14082	0.0790985
0.176179	0.161646	0.133411	0.209609	0.156097	0.163598	0.147733	0.17116	0.162464	0.173285	0.154303	0.137698	0.0844593	0.214386	0.103805	0.209292	0.118718	0.137829	0.099996	0.21925	0.23735	0.139591	0.220016	0.230821	0.213805	0.121121	0.118872	0.158635	0.141469	0.127453	0.157968	0.157821	0.101314	0.142634	0.155724
0.203405	0.195197	0.159256	0.234966	0.121869	0.258553	0.17733	0.199252	0.223225	0.215535	0.230653	0.119598	0.160155	0.182055	0.171785	0.177019	0.117895	0.176741	0.192615	0.187126	0.164468	0.168366	0.192818	0.18302	0.171822	0.164082	0.174762	0.13162	0.164109	0.106678	0.103588	0.123431	0.11646	0.137169	0.160859
0.146249	0.178663	0.128763	0.26179	0.171143	0.126752	0.186613	0.138925	0.0752905	0.136896	0.135876	0.201471	0.0980334	0.131919	0.124053	0.113995	0.0453911	0.114569	0.108952	0.0922651	0.109846	0.204033	0.108575	0.118501	0.112782	0.110256	0.152125	0.127858	0.115277	0.138266	0.15073	0.147326	0.105336	0.137158	0.12282
0.211568	0.219215	0.170925	0.153938	0.115855	0.200954	0.10091	0.174887	0.17043	0.180602	0.0822367	0.143493	0.100897	0.123468	0.0717395	0.126522	0.121981	0.213603	0.105397	0.17473	0.125623	0.175512	0.0923232	0.130123	0.120718	0.120922	0.183594	0.105797	0.181599	0.122056	0.101983	0.197866	0.125517	0.146417	0.114344
H3T3pK4me3
0.250429	0.193053	0.164567	0.134493	0.108067	0.150202	0.122472	0.171564	0.150979	0.11912	0.130339	0.198279	0.185039	0.152765	0.134809	0.204149	0.110435	0.122892	0.1729	0.167137	0.141542	0.140644	0.129008	0.160147	0.13136	0.0815453	0.168628	0.121039	0.153416	0.140798	0.173413	0.0989513	0.15205	0.122981	0.0683271
0.170245	0.162441	0.160554	0.164427	0.208225	0.158372	0.183841	0.206628	0.20629	0.217865	0.207157	0.176467	0.148203	0.100354	0.192594	0.120418	0.242682	0.0993401	0.0844349	0.0852667	0.0932952	0.0902716	0.158704	0.116885	0.0623351	0.204585	0.145356	0.122493	0.107135	0.158874	0.0752826	0.0786455	0.153913	0.0757723	0.192059
0.377673	0.155664	0.088389	0.173896	0.153892	0.109237	0.105133	0.203639	0.16228	0.126833	0.11634	0.194354	0.155091	0.114577	0.164509	0.10882	0.117866	0.11151	0.249813	0.167931	0.226346	0.257129	0.22557	0.163116	0.0757873	0.110364	0.13175	0.213433	0.182428	0.0467823	0.162113	0.103605	0.140658	0.107442	0.0712661
0.189213	0.268523	0.0559709	0.198339	0.314406	0.139358	0.162589	0.39519	0.13622	0.257692	0.0996483	0.330325	0.20014	0.184184	0.194265	0.156618	0.147839	0.271527	0.16292	0.345625	0.170079	0.065917	0.149772	0.0835508	0.258703	0.115364	0.109756	0.17888	0.0931462	0.156263	0.176084	0.165955	0.0772326	0.102752	0.0961806
0.269488	0.208371	0.0778927	0.155406	0.122539	0.21576	0.149436	0.19458	0.106525	0.204212	0.188302	0.111523	0.167782	0.133301	0.0887777	0.0879146	0.215347	0.188027	0.179086	0.126734	0.174346	0.117744	0.208285	0.170942	0.105575	0.135306	0.133635	0.125806	0.166227	0.10527	0.0973775	0.169983	0.0925626	0.158147	0.0723951
0.134505	0.256289	0.186768	0.180963	0.142	0.102067	0.106429	0.127045	0.0984601	0.100466	0.13484	0.168006	0.106973	0.203562	0.082759	0.332765	0.22047	0.105682	0.103395	0.175093	0.0975004	0.103765	0.132393	0.269703	0.146218	0.186297	0.0997541	0.127201	0.111011	0.234957	0.169614	0.252423	0.153266	0.113906	0.113753
0.120511	0.0966697	0.0640321	0.322095	0.0457318	0.233125	0.116803	0.0443734	0.0581683	0.16039	0.127803	0.0701482	0.11081	0.221067	0.112725	0.0932992	0.154463	0.151289	0.152044	0.148604	0.0908425	0.265798	0.0729758	0.174173	0.0852529	0.164804	0.0666771	0.0884186	0.149011	0.166685	0.0848632	0.256178	0.0979337	0.272971	0.131875
0.0843742	0.0975938	0.141428	0.117519	0.0668415	0.211993	0.191536	0.109863	0.112725	0.159991	0.139756	0.163551	0.170656	0.258868	0.0960733	0.19539	0.150432	0.168023	0.156138	0.194736	0.202526	0.174074	0.175179	0.143815	0.184735	0.119904	0.134406	0.170936	0.21796	0.153461	0.12098	0.0692683	0.15649	0.183594	0.100481
0.153982	0.265768	0.107605	0.195359	0.152141	0.129253	0.0910086	0.150174	0.100218	0.157426	0.129657	0.279411	0.149626	0.12963	0.137123	0.144792	0.126232	0.0940099	0.105057	0.0953093	0.133355	0.11854	0.0887357	0.181329	0.178569	0.106393	0.0779121	0.15394	0.263485	0.166187	0.156249	0.110717	0.138081	0.353562	0.172064
0.179298	0.1409	0.0870209	0.0575091	0.108683	0.21277	0.264561	0.179457	0.132917	0.0799509	0.108695	0.163115	0.139691	0.0783478	0.133917	0.11456	0.202511	0.159557	0.0907083	0.179067	0.113829	0.0722342	0.0751377	0.125728	0.210345	0.196559	0.118096	0.173187	0.11742	0.0682765	0.0793151	0.0698648	0.0868987	0.120893	0.137374
0.0815285	0.224608	0.12419	0.20357	0.185937	0.110961	0.117169	0.0960603	0.131166	0.130925	0.0997281	0.103973	0.0622971	0.166609	0.0582758	0.128778	0.138013	0.100668	0.108914	0.207147	0.134397	0.207433	0.0842044	0.161687	0.0774384	0.113295	0.152732	0.222083	0.115302	0.0845203	0.0911837	0.124809	0.0579011	0.0977635	0.0987029
0.306717	0.166675	0.299185	0.251784	0.294604	0.192578	0.227078	0.0871736	0.197408	0.137791	0.0876867	0.13588	0.174834	0.112913	0.286356	0.219835	0.0996535	0.0968932	0.139001	0.108466	0.27773	0.11394	0.114755	0.141958	0.169058	0.174057	0.0925075	0.0744492	0.117612	0.116749	0.169413	0.0993522	0.197091	0.0879116	0.207979
0.0934094	0.191939	0.0848912	0.118197	0.215227	0.106764	0.282251	0.135831	0.171377	0.200991	0.0865834	0.166041	0.138487	0.187011	0.209725	0.209199	0.10176	0.07708	0.0770836	0.0778695	0.0922725	0.104656	0.0667057	0.0909177	0.0587611	0.0739818	0.0608132	0.0822042	0.0690901	0.0637622	0.0801095	0.114372	0.122886	0.107217	0.0779472
0.488339	0.32257	0.225127	0.164035	0.0903043	0.128875	0.118394	0.10614	0.214399	0.149679	0.122598	0.11981	0.110146	0.174331	0.145427	0.277773	0.107387	0.224926	0.0862684	0.115149	0.0857787	0.148338	0.240327	0.0989999	0.0972442	0.158074	0.119222	0.180683	0.141261	0.15978	0.113482	0.119828	0.163448	0.175254	0.0705107
0.167116	0.308895	0.145936	0.176431	0.157511	0.141436	0.105959	0.129629	0.0627155	0.175416	0.307395	0.168053	0.153393	0.090614	0.124869	0.222568	0.261509	0.188948	0.102136	0.110075	0.153893	0.218788	0.121505	0.110734	0.123885	0.220987	0.210643	0.0959156	0.0643771	0.151065	0.0767111	0.109952	0.142345	0.116011	0.173494
0.158767	0.137393	0.237911	0.165447	0.236912	0.0805268	0.266774	0.155156	0.0884482	0.132924	0.0669675	0.171644	0.219695	0.121648	0.221723	0.187931	0.233584	0.137645	0.0724489	0.108938	0.0983633	0.181696	0.0919526	0.0925277	0.271571	0.238552	0.0837227	0.0981391	0.111268	0.204057	0.156637	0.126546	0.0974316	0.275707	0.219176
0.0719745	0.219223	0.163388	0.13558	0.140763	0.218321	0.131193	0.144749	0.164584	0.196351	0.129429	0.384142	0.0849228	0.175514	0.107447	0.224398	0.108229	0.138232	0.121448	0.273344	0.0858817	0.188193	0.162836	0.167532	0.171082	0.189566	0.179567	0.112502	0.149781	0.144476	0.171005	0.237803	0.125628	0.283762	0.114013
0.188423	0.191634	0.127031	0.0734621	0.105126	0.15942	0.100416	0.17611	0.172843	0.106725	0.18791	0.107747	0.11526	0.0974476	0.0913183	0.146728	0.15483	0.0803887	0.105177	0.128068	0.143619	0.140583	0.17938	0.0974014	0.106229	0.161393	0.0918585	0.180108	0.178959	0.126921	0.117886	0.18932	0.159075	0.0975444	0.0702335
0.11606	0.223972	0.137214	0.146846	0.142142	0.112925	0.146751	0.110631	0.172202	0.185028	0.135761	0.206708	0.132078	0.178262	0.1201	0.158849	0.138886	0.105236	0.132241	0.162387	0.151564	0.183551	0.171952	0.127515	0.0934431	0.233082	0.101937	0.252821	0.151117	0.113605	0.185502	0.202162	0.107748	0.153473	0.0980236
0.0650565	0.248738	0.182903	0.193689	0.0858821	0.0715369	0.105912	0.099024	0.121216	0.13432	0.17138	0.0997222	0.207112	0.101042	0.195265	0.0716485	0.108243	0.140346	0.123196	0.0750556	0.087236	0.108534	0.0822745	0.100576	0.136958	0.128689	0.127938	0.153175	0.108725	0.0839283	0.0622533	0.0839654	0.173545	0.0577903	0.0919784
0.132221	0.239691	0.177708	0.15926	0.157762	0.393826	0.150275	0.152131	0.202703	0.18309	0.1895	0.188197	0.0766451	0.180849	0.160929	0.194018	0.154552	0.136801	0.129573	0.149322	0.149499	0.233945	0.155267	0.250293	0.224947	0.188138	0.191184	0.134017	0.0843053	0.148012	0.114743	0.100832	0.0709138	0.300822	0.112996
0.150813	0.283343	0.184712	0.0969294	0.174167	0.13872	0.096839	0.19581	0.132545	0.311541	0.0927112	0.287463	0.194847	0.205539	0.139367	0.1325	0.180895	0.201188	0.132756	0.199272	0.230839	0.196112	0.189351	0.276096	0.249394	0.27588	0.154915	0.168193	0.152293	0.249386	0.130691	0.224526	0.0762829	0.212133	0.160652
0.141871	0.0646466	0.0827038	0.0744992	0.0916345	0.189519	0.116938	0.30021	0.135266	0.102079	0.159309	0.0542516	0.209876	0.181389	0.102665	0.126566	0.135775	0.0712492	0.048794	0.102364	0.0898315	0.0784881	0.0886861	0.0844728	0.0724079	0.0564689	0.0789157	0.0475763	0.113761	0.201857	0.0957534	0.0951662	0.0715152	0.155596	0.106863
0.198429	0.12466	0.0602164	0.105068	0.0803266	0.114942	0.0515097	0.149456	0.110643	0.0798834	0.179714	0.205974	0.116332	0.17484	0.093292	0.086635	0.113956	0.119125	0.160261	0.162471	0.0603453	0.189866	0.308396	0.346533	0.163533	0.20661	0.050116	0.164592	0.075837	0.254439	0.0943323	0.0615484	0.151427	0.24399	0.14427
0.00500863	0.00975267	0.0810643	0.1149	0.215727	0.117767	0.0872788	0.215866	0.051994	0.0721951	0.153088	0.0519073	0.206615	0.183029	0.0953297	0.185163	0.169925	0.115034	0.136892	0.188029	0.136958	0.148581	0.132915	0.0954658	0.0943435	0.149467	0.225273	0.0737414	0.112633	0.113275	0.223848	0.205286	0.165819	0.0739844	0.113439
0.127463	0.15371	0.063116	0.110098	0.0752467	0.122227	0.177525	0.143004	0.172022	0.168845	0.168001	0.175791	0.195525	0.207317	0.123762	0.111527	0.0985454	0.112003	0.148315	0.171675	0.149046	0.189326	0.130749	0.187115	0.106788	0.111238	0.110795	0.132062	0.143116	0.167767	0.112499	0.152499	0.190734	0.119943	0.0828533
0.142721	0.0896156	0.139342	0.198085	0.094599	0.115656	0.278947	0.250642	0.211027	0.222554	0.16419	0.168492	0.133284	0.204318	0.133556	0.130423	0.248688	0.204157	0.138584	0.159619	0.26372	0.191703	0.187464	0.109787	0.2044	0.150946	0.198092	0.144862	0.172939	0.208826	0.139363	0.153824	0.272137	0.156196	0.192419
0.0799528	0.179447	0.100505	0.135584	0.102429	0.196224	0.134496	0.221143	0.154328	0.1429	0.192025	0.124503	0.140126	0.114679	0.167807	0.201284	0.156061	0.193042	0.121646	0.130939	0.117839	0.176183	0.0919925	0.169634	0.128819	0.145612	0.105584	0.120838	0.141438	0.15764	0.107731	0.0349442	0.0850268	0.4092	0.556783
0.170841	0.161235	0.22595	0.121128	0.0969876	0.237202	0.25438	0.15377	0.166427	0.31829	0.159215	0.169181	0.118142	0.270999	0.170373	0.0818295	0.131811	0.171484	0.0447569	0.0681876	0.106552	0.094475	0.0795967	0.131972	0.0626898	0.190939	0.0811422	0.134646	0.15406	0.12054	0.13324	0.138779	0.092041	0.11398	0.0545217
0.150641	0.235229	0.0896644	0.161688	0.13129	0.146746	0.154335	0.143053	0.198958	0.156839	0.123259	0.173717	0.0972455	0.1917	0.116107	0.0967745	0.145645	0.21273	0.175915	0.164717	0.0975644	0.276397	0.147181	0.0819598	0.103619	0.141981	0.184327	0.130591	0.143849	0.151277	0.13228	0.100738	0.120213	0.157928	0.0974864
0.120472	0.223064	0.0850683	0.157519	0.0766365	0.113542	0.118731	0.178586	0.0779076	0.120034	0.117256	0.127961	0.168435	0.160983	0.100811	0.136515	0.0995799	0.107981	0.0841493	0.141593	0.127931	0.124463	0.088269	0.111086	0.0710191	0.189329	0.194426	0.134309	0.0867083	0.192506	0.148159	0.185381	0.115595	0.190393	0.140881
0.167364	0.113807	0.117492	0.180514	0.140502	0.108077	0.121787	0.113159	0.252002	0.0984777	0.197647	0.195597	0.085806	0.101178	0.081586	0.0946981	0.138111	0.0919701	0.135378	0.0657017	0.141676	0.0986613	0.0592593	0.0899133	0.163763	0.116104	0.2125	0.23714	0.206358	0.259066	0.248084	0.175122	0.209884	0.277548	0.22174
0.0206973	0.0106548	0.00705819	0.0100946	0.00940619	0.0101337	0.0131168	0.25365	0.0957259	0.285063	0.17132	0.365457	0.186648	0.113037	0.196844	0.160871	0.126864	0.29086	0.26732	0.20765	0.183283	0.166014	0.128504	0.15736	0.187972	0.19824	0.167328	0.217163	0.139004	0.185179	0.0959058	0.33434	0.126382	0.199758	0.119991
0.168341	0.17566	0.0867237	0.2016	0.215343	0.290677	0.294096	0.277651	0.181128	0.365676	0.191248	0.202914	0.297581	0.195335	0.258119	0.194452	0.12293	0.147836	0.125374	0.278767	0.129222	0.0960214	0.255647	0.0975762	0.177331	0.265897	0.175479	0.344705	0.145582	0.243803	0.212008	0.267051	0.197748	0.213079	0.234132
0.152612	0.223686	0.24372	0.324771	0.296592	0.119875	0.309938	0.352633	0.166227	0.257645	0.147255	0.242115	0.212346	0.365438	0.265261	0.233073	0.146841	0.32283	0.216	0.11931	0.136978	0.177975	0.0875671	0.163885	0.0517042	0.20524	0.229346	0.284841	0.121806	0.12491	0.334696	0.1963	0.198045	0.245595	0.13967
0.15822	0.167332	0.121822	0.143485	0.178974	0.237001	0.133152	0.26135	0.214598	0.118122	0.148711	0.250565	0.137455	0.199346	0.144486	0.176828	0.140765	0.166824	0.182559	0.184654	0.159589	0.249932	0.223078	0.168566	0.154197	0.140221	0.223075	0.128449	0.216256	0.147451	0.141818	0.211367	0.233972	0.158738	0.0863748
0.0841102	0.160549	0.0481781	0.0857551	0.212317	0.152604	0.0555952	0.279302	0.27827	0.18813	0.0618552	0.199384	0.194403	0.125023	0.114052	0.21935	0.0788056	0.169944	0.154571	0.129165	0.0928886	0.146895	0.0607703	0.14297	0.138275	0.112811	0.365769	0.126599	0.0537818	0.117959	0.197457	0.121415	0.09264	0.155742	0.0192096
0.0520478	0.0960443	0.179389	0.257867	0.291961	0.0290697	0.0614339	0.0530083	0.123938	0.125895	0.164871	0.110188	0.304848	0.178374	0.285981	0.0596732	0.15353	0.108685	0.171102	0.2054	0.0682636	0.180416	0.220561	0.124907	0.182652	0.114348	0.213975	0.140119	0.209677	0.191524	0.13746	0.195276	0.121352	0.165154	0.0411801
0.0642214	0.1089	0.138219	0.162299	0.219544	0.22006	0.138749	0.163342	0.0744869	0.11549	0.0817364	0.244267	0.163978	0.16493	0.202911	0.22989	0.0961938	0.121884	0.126103	0.250477	0.141751	0.207271	0.209878	0.0965699	0.155429	0.251801	0.224486	0.247659	0.20397	0.230464	0.229024	0.154827	0.0479631	0.0808742	0.0931947
