# Supplementary material for: Mechanically transduced immunosorbent assay to measure protein-protein interactions
Source: eLife. 2021 Sep 28;10:e67525. doi: 10.7554/eLife.67525 (PMC8479797; doi:10.7554/eLife.67525)
Supplement: Figure 2—source data 2. — Results from statistical tests comparing the indicated pairs of rolling parameters (METRIS) or microarray results (Array). [file elife-67525-fig2-data2.xlsx]

## Sheet: Sheet1
METRIS	Comparison	H3	H3K4me1	H3K4me2	H3K4me3
	H3	N/A
	H3K4me1	<0.0001	N/A
	H3K4me2	<0.0001	<0.0001	N/A
	H3K4me3	<0.0001	<0.0001	<0.0001	N/A
	H3T3pK4me3	<0.0001	<0.0001	<0.0001	<0.0001
Array	Comparison	H3	H3K4me1	H3K4me2	H3K4me3	H3T3pK4me3
	H3	N/A
	H3K4me1	0.4605	N/A
	H3K4me2	0.7904	0.3484	N/A
	H3K4me3	0.0013	<0.0001	<0.0001	N/A
	H3T3pK4me3	1	0.3836	0.7455	0.0005	N/A
	Others	0.7536	0.7744	0.6865	0.0046	0.7005
