# Supplementary material for: Mechanically transduced immunosorbent assay to measure protein-protein interactions
Source: eLife. 2021 Sep 28;10:e67525. doi: 10.7554/eLife.67525 (PMC8479797; doi:10.7554/eLife.67525)
Supplement: Figure 3—source data 1. [file elife-67525-fig3-data1.xlsx]

## Sheet: Sheet1
H4K20me2
0.239773	0.362348	0.316001	0.226791	0.366741	0.42984	0.102693	0.241362	0.248084	0.148281	0.190104	0.316317	0.174844	0.356611	0.219782	0.0592833	0.192917	0.259116	0.193203	0.156369	0.274129	0.126035	0.104066	0.207854	0.0680349	0.184061	0.25142	0.503878	0.540955	0.403945	0.426482	0.448547	0.530026	0.348653	0.392659
0.0836402	0.141014	0.426869	0.315732	0.330772	0.197048	0.388624	0.423252	0.331911	0.300422	0.525117	0.34748	0.421134	0.366972	0.327203	0.488437	0.270725	0.273818	0.24511	0.432017	0.316107	0.426948	0.185125	0.227732	0.129851	0.459591	0.244131	0.48927	0.525271	0.392234	0.414117	0.435543	0.514659	0.338545	0.381275
0.206409	0.236336	0.251297	0.265493	0.280423	0.373765	0.389253	0.114382	0.272443	0.192826	0.407935	0.249396	0.382064	0.343218	0.305953	0.299034	0.27835	0.166335	0.349837	0.347641	0.485657	0.410034	0.486352	0.278587	0.372397	0.334515	0.456599	0.15417	0.260856	0.328538	0.183614	0.269711	0.115915	0.200517	0.343099
0.450869	0.304874	0.320789	0.264377	0.317557	0.145284	0.332394	0.205833	0.164805	0.264956	0.262769	0.263801	0.227416	0.357268	0.395437	0.233083	0.403713	0.199981	0.166901	0.265418	0.248656	0.191162	0.357912	0.365015	0.123595	0.276419	0.156644	0.137238	0.268535	0.286805	0.374943	0.189113	0.349694	0.548507	0.293481
0.202451	0.220917	0.379531	0.221008	0.232031	0.30945	0.312995	0.3234	0.258194	0.293006	0.280213	0.179968	0.159167	0.131685	0.349858	0.222341	0.285621	0.157094	0.153945	0.24894	0.232991	0.0587639	0.15747	0.0735242	0.278203	0.124918	0.184905	0.182752	0.380425	0.12475	0.19894	0.228141	0.0929589	0.109608	0.11538
0.192606	0.187036	0.357483	0.228849	0.28301	0.181737	0.188753	0.159763	0.148673	0.124003	0.116119	0.418152	0.197494	0.204983	0.164907	0.274518	0.215305	0.179512	0.238601	0.161741	0.210476	0.4049	0.295627	0.422996	0.142777	0.350515	0.187526	0.291548	0.14719	0.270459	0.14667	0.278272	0.202354	0.256131	0.270364
0.228235	0.310449	0.388538	0.319588	0.232165	0.155147	0.318428	0.370959	0.475504	0.314452	0.308339	0.256168	0.401304	0.428689	0.277838	0.189004	0.417253	0.281716	0.241424	0.205075	0.464356	0.38088	0.522184	0.187919	0.495857	0.587894	0.335706	0.458874	0.192568	0.267652	0.567677	0.290584	0.310901	0.248487	0.386338
0.351769	0.23107	0.261674	0.197692	0.119571	0.287858	0.272984	0.217897	0.249192	0.396612	0.16573	0.313035	0.171918	0.248056	0.168274	0.231111	0.101388	0.291028	0.166645	0.211081	0.198436	0.208787	0.168035	0.358814	0.254706	0.122237	0.154054	0.299929	0.15905	0.303104	0.152382	0.209179	0.155238	0.266511	0.28857
0.171365	0.169866	0.133495	0.29201	0.0996143	0.229077	0.0747854	0.129294	0.260632	0.207466	0.190641	0.0975218	0.063667	0.255402	0.0627774	0.0674961	0.183482	0.160001	0.0695213	0.0914815	0.0803977	0.240797	0.105981	0.0410116	0.110524	0.141116	0.163678	0.306311	0.089237	0.195828	0.10381	0.165889	0.0703545	0.342966	0.118699
0.535468	0.262795	0.216073	0.456193	0.0946925	0.438429	0.303589	0.485954	0.266413	0.534564	0.321468	0.394532	0.273556	0.264296	0.325596	0.35311	0.278096	0.243254	0.298685	0.0861938	0.128827	0.301773	0.326482	0.288064	0.0923093	0.29133	0.204596	0.304391	0.267194	0.129331	0.116264	0.226433	0.226434	0.294913	0.13092
0.435594	0.480859	0.130284	0.315229	0.336753	0.409386	0.395045	0.294252	0.333795	0.149551	0.113961	0.470651	0.445864	0.410277	0.275164	0.283547	0.306424	0.336268	0.272835	0.309207	0.193751	0.51649	0.454559	0.201378	0.225243	0.261563	0.200506	0.298484	0.365907	0.294803	0.179434	0.291985	0.0606647	0.58178	0.311283
0.351026	0.373814	0.443098	0.206715	0.535172	0.468106	0.276721	0.178749	0.400603	0.151915	0.203013	0.163637	0.51282	0.345609	0.155515	0.29978	0.0549454	0.12628	0.255581	0.365656	0.544476	0.188786	0.310616	0.230866	0.396873	0.217696	0.230141	0.244387	0.486798	0.227603	0.193596	0.0972679	0.204573	0.298601	0.360188
0.179205	0.195192	0.255054	0.255169	0.310873	0.228585	0.326012	0.45789	0.169894	0.394259	0.18362	0.148561	0.0868767	0.234566	0.395889	0.0864525	0.167792	0.190471	0.072905	0.158458	0.115941	0.0742949	0.0491877	0.368333	0.100992	0.194941	0.568026	0.511399	0.117712	0.091258	0.186347	0.152678	0.205008	0.0771269	0.181345
0.161822	0.532122	0.115081	0.25435	0.330839	0.29137	0.271014	0.295951	0.298523	0.461323	0.252962	0.268954	0.373204	0.147342	0.341002	0.289227	0.24684	0.114576	0.252535	0.26994	0.271865	0.428755	0.119114	0.306062	0.193343	0.25563	0.134442	0.12723	0.376402	0.140133	0.0792903	0.123637	0.222551	0.108124	0.0401051
0.309229	0.456453	0.0490465	0.404474	0.220179	0.147922	0.0706164	0.207643	0.0635645	0.424192	0.390755	0.238568	0.115571	0.102672	0.163716	0.26806	0.212263	0.16273	0.24389	0.342732	0.263965	0.271581	0.222089	0.329223	0.183395	0.190847	0.324788	0.310572	0.206415	0.320107	0.14434	0.305422	0.247999	0.290617	0.08976
0.206764	0.291762	0.223678	0.231667	0.270275	0.341948	0.239648	0.107601	0.27625	0.204826	0.215986	0.263333	0.198959	0.167972	0.338904	0.16297	0.295937	0.21726	0.0658175	0.326004	0.409538	0.111413	0.277852	0.294666	0.405556	0.230487	0.173446	0.296577	0.271623	0.243568	0.285865	0.291394	0.229509	0.171059	0.173875
0.408687	0.38561	0.35931	0.224624	0.190294	0.303177	0.237369	0.136996	0.124911	0.146791	0.137966	0.147239	0.38335	0.228492	0.308016	0.189553	0.0437979	0.326878	0.298415	0.177479	0.263007	0.0721993	0.334923	0.280314	0.301302	0.253324	0.13706	0.239121	0.397948	0.152546	0.065923	0.207977	0.112181	0.118027	0.281368
0.364689	0.447707	0.467045	0.428348	0.400071	0.246376	0.304877	0.374857	0.405517	0.355151	0.346041	0.104729	0.474231	0.476895	0.3133	0.307771	0.1719	0.129833	0.141604	0.195969	0.381332	0.392737	0.310923	0.352344	0.342475	0.26278	0.445159	0.289006	0.243509	0.183161	0.177552	0.33875	0.419265	0.500657	0.381495
H4K20me3
0.0364901	0.055094	0.194093	0.206697	0.0692578	0.0171434	0.219931	0.214458	0.33688	0.405472	0.0725653	0.00456597	0.315159	0.299318	0.199829	0.248316	0.0335047	0.0460804	0.0405727	0.0540598	0.218994	0.149528	0.370247	0.316263	0.301146	0.164058	0.0981381	0.361665	0.11523	0.0858022	0.0368766	0.00976032	0.256057	0.180431	0.398203
0.208204	0.245466	0.220224	0.0756837	0.159652	0.115525	0.279988	0.436137	0.247732	0.125433	0.152343	0.0923996	0.113449	0.242602	0.0791815	0.137453	0.085891	0.152641	0.148624	0.150881	0.293564	0.192064	0.352412	0.081455	0.136709	0.16662	0.256078	0.299368	0.0595266	0.15582	0.11014	0.158703	0.215459	0.155593	0.162584
0.23389	0.252499	0.184619	0.245015	0.278162	0.257149	0.213191	0.292381	0.238668	0.150825	0.405259	0.172775	0.102519	0.0370445	0.0886824	0.0967275	0.0657199	0.10791	0.180101	0.00139185	0.0804947	0.232469	0.0745045	0.123815	0.0921826	0.343987	0.0874545	0.129708	0.260283	0.284417	0.214336	0.234819	0.209327	0.161838	0.252993
0.0883827	0.203087	0.226252	0.336455	0.219915	0.229525	0.212428	0.113311	0.100436	0.13124	0.0934812	0.095604	0.16366	0.322333	0.235341	0.340273	0.138567	0.140854	0.105176	0.25691	0.164421	0.120417	0.127705	0.126228	0.290973	0.237468	0.165181	0.247644	0.23048	0.237848	0.202499	0.152952	0.169444	0.141797	0.152587
0.110439	0.191397	0.309766	0.262096	0.274388	0.191799	0.149649	0.250954	0.106026	0.0950119	0.0166664	0.0311636	0.159633	0.217545	0.185534	0.137949	0.185788	0.0987364	0.201292	0.107507	0.268858	0.257374	0.237161	0.177809	0.31768	0.190793	0.107764	0.212683	0.193942	0.297919	0.326164	0.178158	0.160832	0.18728	0.133245
0.273996	0.122069	0.0791722	0.514773	0.120523	0.201769	0.200445	0.162187	0.15917	0.189542	0.134632	0.122983	0.178603	0.100928	0.10035	0.14582	0.234934	0.301024	0.344067	0.170023	0.0814854	0.0756359	0.339734	0.182661	0.0689982	0.0476412	0.385491	0.103674	0.188234	0.0622531	0.280574	0.333556	0.113163	0.0592663	0.358717
0.327567	0.0565892	0.222416	0.237808	0.208729	0.139128	0.195457	0.325171	0.25591	0.228579	0.125499	0.191114	0.244401	0.224538	0.164436	0.123127	0.0543425	0.242706	0.128308	0.170803	0.22956	0.135985	0.315283	0.0925178	0.142047	0.234349	0.156335	0.115894	0.133839	0.0931275	0.258951	0.220527	0.204674	0.207787	0.132395
0.278186	0.0911765	0.126557	0.197521	0.247785	0.32233	0.13453	0.168273	0.29801	0.158927	0.345291	0.0905767	0.215201	0.109402	0.265167	0.209066	0.259108	0.243521	0.220035	0.106859	0.185677	0.117436	0.205631	0.208577	0.10155	0.198405	0.282869	0.267128	0.144232	0.105703	0.0874735	0.0704976	0.0891659	0.0855961	0.313304
0.183225	0.237897	0.21158	0.364928	0.154522	0.132502	0.185647	0.23926	0.132019	0.191767	0.246869	0.155759	0.15298	0.156692	0.182453	0.277617	0.155512	0.285107	0.14768	0.162207	0.178057	0.241326	0.271743	0.365869	0.180986	0.143503	0.21409	0.142495	0.191909	0.116597	0.214122	0.190406	0.181743	0.183803	0.230216
0.319932	0.20368	0.301748	0.159307	0.240581	0.295808	0.15652	0.259609	0.280974	0.243231	0.26484	0.100925	0.141805	0.1136	0.118299	0.184799	0.173117	0.146376	0.222689	0.192117	0.223313	0.163452	0.261006	0.129437	0.274402	0.106734	0.196873	0.17366	0.209695	0.348289	0.186721	0.154216	0.235109	0.161778	0.18868
0.142864	0.095147	0.284085	0.303792	0.261393	0.323338	0.191047	0.21794	0.163367	0.21	0.305186	0.177423	0.158828	0.0788862	0.157825	0.180042	0.217997	0.110265	0.207146	0.154698	0.15691	0.154185	0.210252	0.259494	0.260934	0.409249	0.227946	0.351807	0.204457	0.225504	0.250842	0.0840028	0.158326	0.110528	0.145846
0.0404036	0.122785	0.148433	0.138297	0.225324	0.118938	0.0984365	0.21336	0.174069	0.148935	0.0839558	0.327298	0.120275	0.2327	0.256785	0.0866014	0.284271	0.274083	0.289919	0.252997	0.169671	0.0369497	0.112836	0.130121	0.155737	0.392792	0.106545	0.219004	0.475078	0.157684	0.178896	0.0585859	0.300523	0.565052	0.577213
0.264429	0.134482	0.266829	0.268698	0.253404	0.290468	0.307333	0.0890578	0.0825859	0.117587	0.212439	0.143604	0.181765	0.171385	0.228294	0.232892	0.101207	0.130184	0.110178	0.369903	0.254022	0.159839	0.264951	0.326304	0.209325	0.129365	0.172301	0.201176	0.19142	0.245348	0.23892	0.293826	0.218557	0.319191	0.150635
0.219023	0.266359	0.114413	0.237648	0.197106	0.361317	0.155645	0.288345	0.116016	0.16797	0.161631	0.229842	0.285955	0.0858203	0.0627433	0.236418	0.167445	0.247141	0.274464	0.219532	0.181214	0.341005	0.200158	0.295707	0.283573	0.420705	0.119962	0.195027	0.134174	0.390322	0.0985205	0.0827002	0.142833	0.345835	0.209959
0.159505	0.234805	0.234256	0.307486	0.346813	0.242693	0.273271	0.251554	0.117999	0.10768	0.255095	0.224123	0.158212	0.375844	0.227155	0.375519	0.257446	0.268174	0.175858	0.377863	0.270373	0.0833559	0.108184	0.251655	0.261534	0.267927	0.102333	0.0827562	0.243091	0.229066	0.0747573	0.181596	0.130329	0.230736	0.134603
0.111858	0.170803	0.174515	0.191382	0.17188	0.104638	0.258602	0.223565	0.368587	0.121462	0.433908	0.151168	0.0827499	0.146489	0.146791	0.00279757	0.0526197	0.216558	0.27486	0.131656	0.293289	0.320978	0.483418	0.74859	0.22606	0.191391	0.158426	0.281087	0.1016	0.145077	0.349559	0.117799	0.294087	0.291146	0.19299
0.253475	0.244623	0.233847	0.139392	0.243394	0.275599	0.233091	0.210204	0.308765	0.275462	0.201627	0.331114	0.171062	0.207788	0.140398	0.212548	0.185534	0.118383	0.402365	0.333204	0.216311	0.14162	0.158644	0.0985099	0.232956	0.250612	0.370956	0.16768	0.35704	0.171611	0.130616	0.230548	0.193198	0.134876	0.173488
0.220247	0.286231	0.158172	0.155725	0.418479	0.214156	0.157734	0.0928052	0.185072	0.212461	0.170898	0.115607	0.0863264	0.383795	0.296134	0.155945	0.206149	0.235995	0.161448	0.226504	0.184247	0.27543	0.205716	0.312467	0.340808	0.246025	0.296627	0.162373	0.180127	0.229199	0.230296	0.194329	0.267265	0.243497	0.27157
0.228278	0.277021	0.204182	0.1281	0.241617	0.285318	0.212536	0.115458	0.354009	0.129837	0.301788	0.184824	0.178424	0.219191	0.216545	0.336694	0.0717811	0.195141	0.489875	0.154298	0.191294	0.307458	0.274169	0.203235	0.239501	0.254169	0.200115	0.339056	0.113744	0.135462	0.382089	0.30593	0.178051	0.181711	0.0740419
0.122027	0.274834	0.243099	0.36756	0.220948	0.248505	0.392988	0.250191	0.250837	0.252556	0.237966	0.230517	0.0944007	0.151349	0.142553	0.249807	0.32492	0.234201	0.20586	0.31775	0.205588	0.200579	0.230542	0.213711	0.229695	0.33162	0.171401	0.178887	0.14261	0.318446	0.179109	0.22356	0.0994836	0.193527	0.381184
0.112414	0.161077	0.349925	0.269855	0.302926	0.151396	0.200497	0.259016	0.280766	0.103971	0.266467	0.0956321	0.234148	0.272895	0.489357	0.357827	0.265493	0.236359	0.273723	0.274294	0.2522	0.372309	0.138166	0.207391	0.179752	0.0828116	0.122003	0.183461	0.323736	0.205297	0.231071	0.257236	0.234136	0.155711	0.251558
0.261777	0.221614	0.26194	0.341336	0.31532	0.231056	0.320093	0.193866	0.152742	0.151769	0.336415	0.238473	0.321785	0.18013	0.113792	0.23995	0.28403	0.299955	0.188884	0.291419	0.262002	0.180541	0.169105	0.347524	0.173449	0.0960658	0.287584	0.27316	0.133496	0.16222	0.180618	0.251445	0.257961	0.252213	0.242074
0.302688	0.314987	0.176809	0.252463	0.34067	0.158568	0.243701	0.249913	0.160035	0.310238	0.288371	0.291517	0.132223	0.386832	0.308479	0.24426	0.195989	0.201106	0.194675	0.30655	0.142756	0.149607	0.203688	0.216281	0.395035	0.424697	0.225514	0.306855	0.296126	0.134576	0.223117	0.113861	0.149374	0.239108	0.241523
0.0445747	0.0898446	0.407607	0.0799673	0.41473	0.130481	0.421596	0.203198	0.563004	0.20799	0.571212	0.091617	0.324755	0.037862	0.0707178	0.130756	0.441383	0.0463178	0.42971	0.246093	0.170662	0.0199369	0.331133	0.186734	0.380016	0.0273144	0.692642	0.120326	0.230843	0.334177	0.240652	0.180882	0.391461	0.317386	0.253525
0.251355	0.135155	0.229659	0.137005	0.276369	0.122206	0.0908654	0.0471937	0.371866	0.316943	0.3317	0.270928	0.219815	0.234521	0.238789	0.362307	0.306264	0.186094	0.331052	0.403709	0.228099	0.255578	0.14374	0.166005	0.342817	0.321941	0.319101	0.268465	0.149886	0.263826	0.283646	0.314439	0.435832	0.330015	0.230029
0.385524	0.532906	0.179363	0.361679	0.208063	0.262844	0.259656	0.259091	0.0913118	0.242169	0.355537	0.231738	0.303415	0.18142	0.375538	0.0525218	0.198115	0.449297	0.274803	0.293695	0.135945	0.298966	0.151825	0.252156	0.296505	0.238311	0.262145	0.360983	0.0998378	0.238063	0.129547	0.140592	0.393803	0.364254	0.193378
0.283932	0.220664	0.15147	0.330502	0.308905	0.242791	0.345556	0.127765	0.317462	0.26192	0.353155	0.241059	0.230378	0.327049	0.212938	0.291111	0.2541	0.217775	0.247475	0.301754	0.27344	0.226783	0.22434	0.230563	0.286004	0.353997	0.236323	0.351297	0.29251	0.369664	0.235065	0.225492	0.325183	0.383136	0.284517
H4K20me1
0.190427	0.156717	0.215337	0.0745808	0.297192	0.182309	0.216575	0.11758	0.205287	0.261971	0.145375	0.274108	0.0945003	0.236739	0.150163	0.241309	0.147483	0.361488	0.128242	0.324726	0.163581	0.124918	0.25011	0.116232	0.115511	0.155461	0.147205	0.18887	0.23026	0.287485	0.182593	0.127717	0.204019	0.184018	0.180599
0.126563	0.398207	0.154195	0.105298	0.0695181	0.347266	0.0780403	0.19539	0.268775	0.253022	0.304508	0.356184	0.3566	0.342325	0.155274	0.0553669	0.0959665	0.138607	0.0794931	0.230878	0.158298	0.388469	0.0841449	0.265744	0.078532	0.139607	0.122377	0.186384	0.110846	0.147981	0.180551	0.0931419	0.162494	0.274282	0.183783
0.134848	0.0961761	0.197695	0.274696	0.23515	0.245939	0.114971	0.130788	0.0784899	0.209211	0.0967304	0.241447	0.157775	0.146538	0.240495	0.248141	0.0731443	0.331507	0.307888	0.22447	0.37524	0.294958	0.10476	0.303685	0.164722	0.370369	0.301586	0.142488	0.231597	0.149122	0.095597	0.122136	0.195331	0.108827	0.260619
0.103669	0.279282	0.200532	0.239985	0.145263	0.0929279	0.225844	0.311355	0.331306	0.196166	0.242122	0.0721435	0.280659	0.300362	0.217517	0.14613	0.215274	0.111865	0.0862744	0.25116	0.230791	0.17729	0.13396	0.278304	0.0479152	0.338101	0.163478	0.0956831	0.206641	0.131879	0.461275	0.289981	0.302268	0.220701	0.142714
0.174284	0.275132	0.178737	0.389621	0.167787	0.245806	0.134215	0.283651	0.261569	0.235041	0.139058	0.264372	0.201044	0.234772	0.151112	0.187359	0.159034	0.141655	0.197652	0.136826	0.160207	0.275595	0.189317	0.253963	0.207062	0.206015	0.154489	0.264457	0.218632	0.215228	0.192568	0.224028	0.145184	0.255928	0.195121
0.409831	0.230309	0.146451	0.240869	0.322508	0.160521	0.0951036	0.116939	0.338356	0.115331	0.192253	0.0863712	0.235162	0.128857	0.22431	0.277523	0.198063	0.313349	0.123976	0.244732	0.201059	0.07824	0.0857378	0.276552	0.0920261	0.133275	0.330045	0.290314	0.201655	0.316551	0.224718	0.336514	0.247819	0.162322	0.261158
0.150998	0.345107	0.297995	0.122765	0.0792699	0.122705	0.341809	0.342507	0.355837	0.40988	0.0798213	0.232752	0.199055	0.100522	0.342636	0.164649	0.278274	0.313352	0.0905648	0.207439	0.173498	0.345494	0.280218	0.216181	0.253811	0.129477	0.367249	0.201268	0.222548	0.194339	0.26029	0.174084	0.112043	0.166567	0.136046
0.604677	0.187646	0.0513078	0.245881	0.327893	0.217142	0.0551824	0.120735	0.267454	0.263885	0.0586017	0.251876	0.107992	0.17144	0.243082	0.301041	0.174509	0.0493583	0.105531	0.345454	0.141781	0.184981	0.633081	0.662594	0.490081	0.0920765	0.133892	0.167105	0.215345	0.30432	0.0887506	0.0717484	0.226921	0.102083	0.164923
0.240444	0.486305	0.179729	0.415091	0.221656	0.36088	0.166529	0.262445	0.337883	0.136788	0.363309	0.426041	0.242474	0.249757	0.308656	0.0826123	0.0550141	0.204572	0.166956	0.280681	0.315367	0.135324	0.195658	0.127408	0.0426687	0.197689	0.148225	0.341294	0.221682	0.191677	0.0821656	0.206872	0.156869	0.163389	0.276761
0.166676	0.268933	0.101732	0.250383	0.263523	0.210228	0.16482	0.200862	0.279739	0.17349	0.121914	0.283063	0.251298	0.461981	0.185623	0.327693	0.174956	0.347606	0.142848	0.158985	0.11212	0.25261	0.250744	0.332466	0.147364	0.277283	0.138838	0.290453	0.158872	0.272893	0.232066	0.319746	0.215522	0.341683	0.138803
0.0952173	0.266402	0.0719647	0.262149	0.287153	0.136353	0.32539	0.0991061	0.433928	0.364111	0.117964	0.206428	0.276578	0.165017	0.354686	0.287038	0.0827891	0.157695	0.401092	0.170734	0.208877	0.196885	0.297583	0.238699	0.395965	0.335777	0.214828	0.190958	0.35774	0.104945	0.31117	0.169564	0.389245	0.285217	0.145378
0.222127	0.204278	0.335057	0.283907	0.147845	0.254569	0.187303	0.325198	0.10951	0.351927	0.33963	0.28395	0.18351	0.355293	0.2812	0.18975	0.403003	0.175148	0.339056	0.281871	0.291954	0.220355	0.339801	0.187426	0.287085	0.253442	0.178088	0.341486	0.241912	0.219657	0.184332	0.329509	0.111693	0.273796	0.211296
0.381493	0.363346	0.354152	0.287943	0.37667	0.186063	0.397122	0.118405	0.356693	0.298061	0.401231	0.312159	0.247067	0.152783	0.248022	0.242178	0.405745	0.225234	0.280911	0.309685	0.0558026	0.267801	0.268472	0.267305	0.0890115	0.363343	0.0534286	0.403831	0.188845	0.207644	0.322599	0.321161	0.127453	0.180629	0.19077
0.387322	0.133564	0.193664	0.279194	0.333815	0.335159	0.236097	0.399721	0.360427	0.438299	0.0958401	0.302407	0.366229	0.236684	0.205124	0.261931	0.308558	0.143306	0.455186	0.270778	0.225916	0.225103	0.356132	0.280772	0.149552	0.420451	0.228957	0.458881	0.347026	0.399076	0.268753	0.292594	0.358038	0.346308	0.23431
H4
0.417529	0.223896	0.162709	0.161818	0.178567	0.237848	0.164436	0.230388	0.156394	0.287268	0.253574	0.211125	0.154717	0.202651	0.243509	0.285882	0.238222	0.232246	0.141524	0.13578	0.247614	0.14832	0.122657	0.228296	0.185255	0.1659	0.20254	0.181028	0.118651	0.231919	0.136644	0.434379	0.281579	0.0871376	0.089247
0.156117	0.166283	0.16907	0.216123	0.257848	0.343134	0.178466	0.281695	0.245679	0.349594	0.26009	0.225876	0.227569	0.196232	0.1626	0.183857	0.240569	0.260128	0.243078	0.250683	0.265477	0.199907	0.179841	0.263832	0.100778	0.267578	0.149403	0.168133	0.230655	0.118264	0.340463	0.218484	0.146463	0.148157	0.263745
0.239594	0.216773	0.224241	0.145443	0.317991	0.141822	0.193394	0.176328	0.271672	0.217605	0.203507	0.22779	0.227248	0.246025	0.225167	0.194443	0.307667	0.238746	0.314544	0.250009	0.137415	0.134258	0.182184	0.118498	0.19209	0.203532	0.155808	0.291751	0.167648	0.133278	0.144639	0.240494	0.169231	0.149254	0.225126
0.162405	0.321914	0.117682	0.262536	0.201599	0.270058	0.174002	0.172506	0.239044	0.219509	0.181449	0.267397	0.155426	0.215338	0.280361	0.146857	0.283299	0.196031	0.174691	0.220319	0.188536	0.167179	0.204319	0.246784	0.158656	0.198912	0.139521	0.0852939	0.142551	0.123038	0.196014	0.12562	0.121108	0.142808	0.0768321
0.145822	0.271654	0.167933	0.258113	0.168838	0.250587	0.220727	0.278956	0.128431	0.20382	0.16638	0.148346	0.134161	0.0988702	0.209592	0.221244	0.207945	0.189361	0.234612	0.30487	0.176099	0.256489	0.18665	0.176666	0.0817208	0.118817	0.164716	0.151891	0.14658	0.109411	0.152195	0.213097	0.138032	0.138059	0.1306
0.155226	0.166764	0.309892	0.170497	0.210331	0.173831	0.08602	0.114803	0.174061	0.226947	0.195645	0.153308	0.173263	0.183977	0.175401	0.187015	0.181005	0.0915414	0.0863471	0.178151	0.187998	0.156125	0.135804	0.112262	0.105899	0.247887	0.136829	0.278095	0.159902	0.199384	0.136127	0.187345	0.175714	0.14583	0.124122
0.169804	0.299152	0.164109	0.341889	0.296875	0.311275	0.302944	0.213281	0.429163	0.179285	0.308355	0.350223	0.207098	0.213984	0.275095	0.139991	0.383477	0.4753	0.314879	0.188634	0.196976	0.125245	0.197912	0.201398	0.208191	0.0934026	0.322368	0.284625	0.395059	0.25362	0.348711	0.420867	0.35032	0.372358	0.364476
0.287455	0.197234	0.193127	0.17333	0.17466	0.188735	0.186336	0.212117	0.175974	0.246076	0.264841	0.220469	0.243957	0.180382	0.265605	0.247225	0.113684	0.205933	0.141456	0.230051	0.200477	0.175981	0.20418	0.235447	0.0359344	0.0934026	0.322368	0.284625	0.395059	0.25362	0.348711	0.420867	0.35032	0.372358	0.364476
0.276716	0.234533	0.336523	0.158791	0.395193	0.130676	0.147714	0.170793	0.132266	0.190107	0.232066	0.172847	0.285954	0.159752	0.210211	0.145836	0.120014	0.11215	0.179757	0.155189	0.167711	0.17795	0.205616	0.211605	0.246375	0.186656	0.266622	0.238442	0.119688	0.142277	0.10302	0.101276	0.274682	0.330338	0.377461
0.420797	0.128013	0.114217	0.317187	0.219903	0.17459	0.195606	0.139864	0.36713	0.201777	0.133956	0.219377	0.257435	0.129234	0.353174	0.248401	0.141272	0.111363	0.211717	0.20207	0.139106	0.289882	0.171357	0.156096	0.288987	0.199938	0.266817	0.276734	0.190823	0.235012	0.159894	0.205715	0.0775492	0.119375	0.137845
0.298197	0.201003	0.163015	0.239485	0.224849	0.263014	0.251186	0.210318	0.188146	0.207609	0.266717	0.216724	0.212935	0.282712	0.152967	0.247142	0.122456	0.147086	0.152917	0.201642	0.119035	0.119783	0.110201	0.161146	0.129753	0.0794848	0.168109	0.159435	0.171267	0.11188	0.0915797	0.138475	0.161329	0.125752	0.280727
0.313223	0.231236	0.3064	0.221796	0.154054	0.229128	0.290252	0.291419	0.115543	0.143503	0.147009	0.144273	0.129427	0.195471	0.202287	0.207176	0.231506	0.15497	0.258473	0.125911	0.242441	0.193604	0.258833	0.201999	0.121743	0.158788	0.0917889	0.126094	0.128667	0.257809	0.234214	0.111181	0.115718	0.145233	0.145107
0.136196	0.151207	0.217657	0.203725	0.199747	0.148329	0.311941	0.193563	0.231347	0.275625	0.112689	0.12843	0.139258	0.246173	0.10986	0.268038	0.13921	0.204431	0.0837048	0.222825	0.183693	0.173198	0.148676	0.111304	0.067015	0.119447	0.137678	0.163894	0.145525	0.135751	0.106926	0.173636	0.15576	0.257931	0.080513
0.229019	0.289623	0.16151	0.118965	0.173711	0.269533	0.228472	0.178202	0.129325	0.193401	0.183525	0.159881	0.154869	0.133473	0.171042	0.122105	0.15322	0.171865	0.132276	0.175883	0.194717	0.201832	0.279049	0.286259	0.128935	0.123672	0.103768	0.157398	0.172288	0.114547	0.153179	0.107986	0.100961	0.283806	0.147519
0.292919	0.134883	0.272975	0.146386	0.401981	0.118099	0.386254	0.175806	0.150924	0.295192	0.359804	0.390553	0.280171	0.27062	0.240601	0.351241	0.190928	0.163658	0.17463	0.214276	0.141198	0.152593	0.227833	0.136572	0.186994	0.219052	0.20041	0.309548	0.240762	0.366609	0.291602	0.103919	0.163621	0.316073	0.230254
0.441338	0.422605	0.165008	0.211861	0.231752	0.25209	0.243204	0.12957	0.0985383	0.214443	0.208768	0.0841778	0.207496	0.16088	0.230125	0.242213	0.269894	0.189993	0.176215	0.243005	0.20108	0.155484	0.237841	0.16329	0.234447	0.216129	0.210364	0.155629	0.168245	0.418002	0.126564	0.133202	0.149635	0.26094	0.26158
0.276954	0.150821	0.276701	0.193125	0.253913	0.213428	0.275446	0.123548	0.223264	0.175504	0.325002	0.153513	0.198173	0.205348	0.112312	0.120716	0.158166	0.159716	0.121488	0.212598	0.280649	0.268616	0.213119	0.154352	0.191573	0.200681	0.202321	0.147066	0.142041	0.119968	0.217777	0.400283	0.361992	0.219472	0.252033
0.302827	0.352072	0.231559	0.36198	0.244256	0.287709	0.132266	0.27035	0.214571	0.254658	0.156889	0.280095	0.274404	0.23978	0.142355	0.265194	0.221574	0.249488	0.148576	0.252498	0.111774	0.182074	0.111426	0.147534	0.169771	0.151711	0.215186	0.126105	0.152151	0.215608	0.217277	0.223778	0.268579	0.289085	0.170994
0.233287	0.200276	0.231339	0.223712	0.204891	0.230348	0.253206	0.223755	0.21148	0.137923	0.132751	0.219864	0.106524	0.326853	0.124114	0.225727	0.117148	0.154838	0.155011	0.118448	0.253445	0.0971405	0.243714	0.193475	0.210971	0.213913	0.24714	0.254048	0.193199	0.197447	0.221329	0.304009	0.195115	0.149766	0.11908
0.310787	0.32171	0.235792	0.180861	0.119626	0.24985	0.149944	0.168789	0.222374	0.305978	0.119103	0.279872	0.201499	0.285152	0.216984	0.235911	0.307044	0.217747	0.204867	0.222323	0.253382	0.280533	0.211519	0.167916	0.183101	0.185655	0.214492	0.220488	0.167677	0.171364	0.192091	0.263848	0.16934	0.129981	0.103349
0.227614	0.197011	0.252614	0.336206	0.142138	0.209909	0.208162	0.17208	0.213663	0.141307	0.233594	0.20705	0.15796	0.354721	0.208491	0.27217	0.126913	0.138739	0.169309	0.235202	0.15155	0.101438	0.276726	0.244919	0.204707	0.126066	0.127204	0.220921	0.213591	0.162733	0.170595	0.21509	0.104949	0.164353	0.0875963
0.303723	0.175461	0.119966	0.198505	0.244989	0.340791	0.233437	0.225284	0.328119	0.339558	0.221805	0.349452	0.147426	0.167557	0.118107	0.216408	0.319018	0.216306	0.17738	0.161031	0.20634	0.147694	0.101531	0.29789	0.124429	0.199094	0.19327	0.116073	0.12631	0.216822	0.14015	0.155818	0.225004	0.151372	0.170464
0.423239	0.319686	0.267885	0.250242	0.336055	0.278893	0.342244	0.160547	0.290742	0.205989	0.143103	0.330156	0.227217	0.21366	0.281463	0.180931	0.145111	0.209092	0.25391	0.289035	0.178827	0.142787	0.223483	0.189253	0.161594	0.199063	0.243844	0.194409	0.137539	0.112481	0.185684	0.144677	0.132164	0.156636	0.214292
0.273253	0.128445	0.349463	0.395709	0.166549	0.10706	0.228752	0.244678	0.241491	0.149396	0.254892	0.201045	0.26347	0.251276	0.260191	0.168034	0.122858	0.266757	0.17215	0.144709	0.186758	0.227448	0.117527	0.392814	0.176882	0.293026	0.115049	0.134867	0.243458	0.248299	0.16146	0.285406	0.147126	0.190039	0.150467
0.287951	0.20024	0.244704	0.131387	0.18853	0.110219	0.141973	0.119683	0.0885192	0.133363	0.131117	0.151503	0.152081	0.0995431	0.13827	0.130036	0.201326	0.196875	0.113876	0.122785	0.106336	0.15543	0.121979	0.0932621	0.126075	0.161241	0.111441	0.160581	0.147145	0.184622	0.183659	0.176424	0.194889	0.144325	0.137443
0.275446	0.20396	0.164831	0.12724	0.200405	0.235317	0.180477	0.17634	0.253092	0.246882	0.165062	0.131835	0.199056	0.170187	0.189768	0.19732	0.152788	0.158185	0.195805	0.224434	0.321385	0.085506	0.206209	0.264661	0.170073	0.497641	0.171057	0.324676	0.185135	0.420271	0.186161	0.256208	0.200682	0.0867799	0.427242
0.150979	0.210506	0.276207	0.136652	0.279472	0.136786	0.268625	0.206203	0.225711	0.202268	0.2202	0.131867	0.140259	0.200657	0.217672	0.184074	0.274318	0.270196	0.15047	0.304119	0.246253	0.258132	0.302658	0.0837305	0.213953	0.218727	0.140733	0.178521	0.327175	0.194049	0.178161	0.164057	0.172442	0.216101	0.136035
0.225149	0.290562	0.289967	0.211795	0.205867	0.132953	0.202719	0.11639	0.286519	0.256222	0.191301	0.208637	0.212392	0.225462	0.147587	0.123325	0.144881	0.189481	0.111142	0.13949	0.140031	0.178601	0.23432	0.22532	0.193275	0.114913	0.250925	0.183689	0.230559	0.288467	0.141791	0.222968	0.113928	0.10239	0.189007
0.171718	0.227527	0.0993452	0.153738	0.17565	0.227221	0.173584	0.164872	0.170227	0.118347	0.154418	0.075336	0.121312	0.105733	0.151446	0.162868	0.208379	0.248431	0.117432	0.164691	0.161339	0.184252	0.182849	0.167648	0.174927	0.102294	0.187504	0.210914	0.125931	0.188501	0.26906	0.249719	0.155354	0.188057	0.119717
