# Supplementary material for: Mechanically transduced immunosorbent assay to measure protein-protein interactions
Source: eLife. 2021 Sep 28;10:e67525. doi: 10.7554/eLife.67525 (PMC8479797; doi:10.7554/eLife.67525)
Supplement: Figure 3—source data 2. — Results from statistical tests comparing the indicated pairs of rolling parameters (METRIS) or microarray results (Array). [file elife-67525-fig3-data2.xlsx]

## Sheet: Sheet1
METRIS	Comparison	H4	H4K20me1	H4K20me2
	H4	N/A
	H4K20me1	<0.0001	N/A
	H4K20me2	<0.0001	<0.0001	N/A
	H4K20me3	<0.0001	<0.0001	<0.0001
Array	Comparison	H4	H4K20me1	H4K20me2	H4K20me3
	H4	N/A
	H4K20me1	0.0743	N/A
	H4K20me2	0.0003	0.0136	N/A
	H4K20me3	0.3752	0.1602	0.0003	N/A
	Others	0.5118	0.0532	0.001	0.0681
