# Supplementary material for: Mechanically transduced immunosorbent assay to measure protein-protein interactions
Source: eLife. 2021 Sep 28;10:e67525. doi: 10.7554/eLife.67525 (PMC8479797; doi:10.7554/eLife.67525)
Supplement: Figure 4—source data 1. — Each row is a different roller and each column is an actuation. [file elife-67525-fig4-data1.xlsx]

## Sheet: Sheet1
Ube2D1-Ubiquitin
0.0790428	0.0654786	0.0625869	0.073241	0.13118	0.0774227	0.0696974	0.0710812	0.125497	0.120692	0.0783218	0.103776	0.139575	0.0833983	0.10427	0.118228	0.136978	0.20896	0.111422	0.130996	0.0978651	0.0683918	0.083453	0.0927265	0.103912	0.0752494	0.0837034	0.0669179	0.0999987	0.0732169	0.0705026	0.081399	0.0832646	0.0778647
0.0870143	0.109843	0.15467	0.144579	0.168213	0.134262	0.0930197	0.170629	0.151082	0.100879	0.119632	0.0904722	0.160381	0.0957125	0.0756924	0.0647972	0.109001	0.0894467	0.0989045	0.139908	0.0783449	0.0970222	0.100323	0.0771104	0.0699878	0.071096	0.0803063	0.084679	0.0737456	0.0862147	0.0672696	0.094096	0.120859	0.113533
0.121804	0.171124	0.181476	0.16698	0.149101	0.170724	0.131059	0.119094	0.0957373	0.147012	0.125875	0.110758	0.0732483	0.127618	0.132207	0.201302	0.123979	0.0929101	0.0660312	0.0832887	0.0633592	0.177078	0.122187	0.243073	0.104796	0.166785	0.158467	0.197935	0.119795	0.191393	0.113396	0.180698	0.0736332	0.0928484
0.14661	0.197124	0.169424	0.200646	0.149564	0.144786	0.156062	0.119841	0.219899	0.17919	0.124494	0.16524	0.112422	0.146515	0.0850622	0.146442	0.136336	0.0969917	0.0615977	0.142676	0.105729	0.197944	0.210181	0.187528	0.186905	0.225312	0.192963	0.121484	0.15305	0.118505	0.115827	0.0896243	0.0784599	0.098085
0.154346	0.139787	0.122004	0.110085	0.128621	0.127864	0.218658	0.22348	0.130006	0.180221	0.124281	0.118034	0.157701	0.193459	0.150216	0.214026	0.138534	0.163695	0.176447	0.178633	0.186967	0.161773	0.194958	0.147303	0.198931	0.169436	0.190375	0.230906	0.143795	0.156347	0.190129	0.213351	0.126771	0.223119
0.116291	0.265888	0.240711	0.20464	0.309898	0.276366	0.210403	0.32895	0.203796	0.240857	0.206238	0.220029	0.147065	0.171073	0.215351	0.390203	0.174866	0.15356	0.341938	0.211615	0.246329	0.123188	0.220236	0.217157	0.17141	0.20645	0.216686	0.197622	0.112026	0.168391	0.158046	0.150474	0.184727	0.228636
0.182057	0.131854	0.14168	0.117969	0.150982	0.0862675	0.143624	0.0899677	0.109172	0.119146	0.120123	0.103672	0.0862132	0.0840051	0.0983355	0.113085	0.128801	0.0716493	0.0865112	0.0680728	0.117904	0.0997674	0.0985895	0.172174	0.138861	0.196656	0.0851744	0.16877	0.098732	0.0677735	0.0925737	0.0880475	0.105723	0.0844018
0.080602	0.093386	0.111288	0.0609914	0.066647	0.0786184	0.119672	0.103029	0.113865	0.0540088	0.217254	0.227112	0.224454	0.203611	0.123089	0.308216	0.0855711	0.172172	0.157785	0.127699	0.197773	0.14831	0.166048	0.18584	0.10074	0.0922155	0.13664	0.115967	0.155948	0.133733	0.0948456	0.217172	0.0976172	0.171522
0.0703177	0.0725712	0.09319	0.139127	0.0751448	0.0807675	0.095715	0.0964485	0.0650791	0.108148	0.0923698	0.0863032	0.0718392	0.0872739	0.0857534	0.110869	0.110827	0.0757367	0.0693754	0.078277	0.0759201	0.102469	0.0806565	0.0707626	0.117877	0.0769708	0.0822791	0.130543	0.115684	0.11519	0.0949835	0.0676868	0.0700038	0.0880282
0.0707349	0.154832	0.14576	0.166195	0.100133	0.0816071	0.0766936	0.103886	0.123593	0.133161	0.118519	0.102492	0.142964	0.158368	0.0973093	0.0736908	0.192691	0.11754	0.122755	0.190489	0.114909	0.134869	0.138383	0.107145	0.15214	0.109645	0.0882084	0.0654141	0.0782127	0.0554068	0.112125	0.121239	0.055368	0.117984
0.0902371	0.0719747	0.0926416	0.0775666	0.0877107	0.0781604	0.119312	0.122124	0.0978854	0.0914946	0.0909862	0.111087	0.100052	0.123322	0.0968579	0.0854349	0.116567	0.139355	0.1096	0.0837471	0.121825	0.0877121	0.126487	0.0808112	0.129309	0.109121	0.0963741	0.124831	0.0838909	0.102	0.107104	0.0980269	0.0985786	0.0779107
0.143413	0.090099	0.152908	0.0908151	0.125264	0.0791431	0.0997534	0.130424	0.12141	0.0950264	0.0926472	0.0783425	0.151453	0.108856	0.12066	0.0794463	0.0839975	0.108683	0.121679	0.0702756	0.104914	0.125399	0.0994206	0.113896	0.0814675	0.0817473	0.0935338	0.0910056	0.127362	0.0673457	0.139011	0.0773433	0.0785576	0.109639
0.0793823	0.101437	0.151854	0.0951322	0.0537425	0.0738803	0.0865636	0.0864202	0.093338	0.121726	0.107855	0.0573652	0.0693559	0.0775248	0.075457	0.0664267	0.0887466	0.102432	0.132533	0.0916615	0.084064	0.0630468	0.0850054	0.0839493	0.0253416	0.0317105	0.124186	0.0548578	0.0630619	0.0790787	0.0731333	0.0813929	0.0673424	0.073253
0.0950887	0.0701023	0.0869347	0.102916	0.0882422	0.0668872	0.0671065	0.0781201	0.0818617	0.0790297	0.0747751	0.0898125	0.0725727	0.0707556	0.0876109	0.0897214	0.0657081	0.127604	0.0762826	0.0762194	0.070181	0.0927101	0.0852826	0.059206	0.0752944	0.102355	0.0780565	0.114763	0.0650781	0.0955484	0.0766158	0.12284	0.0835259	0.105141
0.169789	0.109104	0.0850647	0.113213	0.152618	0.0848773	0.0806868	0.113703	0.102348	0.0662417	0.0851106	0.0814159	0.0929784	0.0999165	0.0712713	0.10224	0.103314	0.130346	0.108479	0.103743	0.0987438	0.0816529	0.0856487	0.0607581	0.0971737	0.11368	0.0789482	0.0961253	0.119461	0.0646924	0.0829489	0.0968652	0.093413	0.0710358
0.15807	0.10982	0.125783	0.174413	0.146106	0.0730638	0.141384	0.10307	0.159266	0.122615	0.185017	0.0844601	0.0989817	0.115493	0.0924571	0.142108	0.124117	0.0713727	0.098008	0.096109	0.111785	0.094981	0.130135	0.148933	0.205857	0.137345	0.0986172	0.139104	0.187852	0.152006	0.20858	0.133599	0.17291	0.113905
0.0936068	0.0946654	0.11524	0.0821118	0.0946634	0.0511833	0.0779173	0.0818271	0.114307	0.0901851	0.0645871	0.0763831	0.0878532	0.110409	0.0768151	0.099004	0.0894323	0.0805532	0.0685532	0.0887658	0.0782816	0.079246	0.109392	0.0605799	0.0668098	0.0782443	0.0650385	0.0543882	0.0900791	0.0746245	0.0842564	0.0842286	0.0788125	0.0780256
0.109891	0.115168	0.119829	0.0814784	0.147774	0.0599614	0.105889	0.0908073	0.0758664	0.0780837	0.0737982	0.0807862	0.0919018	0.0616388	0.0898191	0.0704868	0.131098	0.108933	0.0774391	0.0757587	0.112229	0.144684	0.0914453	0.115501	0.109348	0.0602044	0.0769312	0.062726	0.0787394	0.0843343	0.0813018	0.06875	0.0990999	0.08412
0.0731966	0.0771717	0.0703337	0.079922	0.0614437	0.0965503	0.135539	0.0953104	0.114107	0.0918998	0.111591	0.0644197	0.0905745	0.0704864	0.0670654	0.0613388	0.0673192	0.0824749	0.0820791	0.0662371	0.131253	0.0844235	0.086598	0.0766585	0.0626542	0.0586044	0.0774405	0.0700829	0.063569	0.0476426	0.0713477	0.0828408	0.0783891	0.0539009
0.154167	0.0749149	0.0948422	0.0757995	0.160026	0.122708	0.0931149	0.0777271	0.0637189	0.237019	0.136077	0.0757267	0.243402	0.223628	0.0834648	0.0988073	0.0884438	0.138945	0.0951899	0.246741	0.106786	0.216057	0.0810468	0.101262	0.166794	0.0923428	0.0892392	0.102062	0.0931675	0.112149	0.139401	0.107065	0.1034	0.0679683
0.0839565	0.136756	0.102846	0.0595157	0.0605661	0.0909299	0.0703193	0.0879911	0.0866035	0.11044	0.065657	0.0912585	0.1188	0.168207	0.0540053	0.0750494	0.0785872	0.0589475	0.0870862	0.0690024	0.0748406	0.0636471	0.0888307	0.0692289	0.088111	0.111875	0.098381	0.111978	0.0643089	0.103305	0.114027	0.102851	0.103945	0.122307
0.10495	0.0693908	0.136437	0.0688875	0.107595	0.143089	0.10822	0.0877035	0.214699	0.146853	0.175186	0.104677	0.114915	0.111082	0.116092	0.0923987	0.0835875	0.072296	0.110321	0.0786429	0.168481	0.069548	0.174458	0.106579	0.116126	0.0752183	0.10868	0.114594	0.109894	0.0931982	0.125324	0.0788235	0.090426	0.0766606
0.14322	0.0838862	0.084329	0.0639412	0.120884	0.103287	0.110729	0.0726549	0.0889045	0.0853889	0.0804358	0.0438555	0.168937	0.0871891	0.122721	0.101267	0.0895332	0.0796303	0.0807621	0.0818274	0.101084	0.113192	0.108005	0.0977579	0.171048	0.0791453	0.123278	0.0737371	0.0705453	0.097105	0.108931	0.0924512	0.111623	0.107683
0.176598	0.0615359	0.0760957	0.0737665	0.0711528	0.0749468	0.114225	0.079054	0.11401	0.0598292	0.0885678	0.0594026	0.0820629	0.0738945	0.0786251	0.0810036	0.105131	0.11153	0.10173	0.0872185	0.0886152	0.064787	0.128465	0.088807	0.133297	0.0714457	0.119052	0.0863239	0.0808983	0.117521	0.157412	0.0862732	0.083554	0.0942591
0.0901917	0.228178	0.0582425	0.107589	0.0926757	0.0895496	0.15884	0.241863	0.120307	0.0619465	0.0735905	0.0813498	0.108918	0.125963	0.0822945	0.164975	0.165613	0.161194	0.0869203	0.0892883	0.0607508	0.119307	0.0650321	0.0678258	0.0820047	0.11038	0.106575	0.102636	0.0748007	0.0959083	0.103743	0.0589076	0.104193	0.075419
0.0848298	0.101831	0.118874	0.112187	0.183643	0.116412	0.0799007	0.090667	0.0987899	0.108501	0.0801146	0.100869	0.121707	0.0801609	0.100233	0.100215	0.129184	0.0784832	0.0914175	0.118655	0.0934474	0.121395	0.0952999	0.0990198	0.150506	0.116604	0.121806	0.107491	0.0941676	0.0610984	0.11055	0.0829005	0.0978275	0.112391
0.0969649	0.085333	0.0866875	0.0975573	0.0703658	0.0991503	0.102502	0.0998894	0.105508	0.0788599	0.115991	0.0565182	0.0854778	0.0704455	0.174025	0.0869481	0.0828422	0.0930893	0.112003	0.0294541	0.0320832	0.109979	0.0665132	0.0560288	0.0936255	0.0673745	0.096402	0.0827891	0.0944902	0.0808023	0.12068	0.0494098	0.0781423	0.0659575
0.0824883	0.0528957	0.0731494	0.100962	0.0794503	0.0649307	0.0863123	0.0768523	0.0725708	0.0925677	0.0706443	0.07628	0.0704267	0.0616419	0.0812024	0.0776353	0.0859588	0.0922629	0.0751564	0.0889442	0.0935218	0.0544648	0.10541	0.0905738	0.0734922	0.0589107	0.0706824	0.0770924	0.0778381	0.0675508	0.0962467	0.0815898	0.0663187	0.0566757
0.0950457	0.102007	0.156821	0.164527	0.132467	0.134559	0.128985	0.126077	0.0958692	0.0672222	0.113718	0.080904	0.0814241	0.0829082	0.0824322	0.0824479	0.0790315	0.0951924	0.0705697	0.0864295	0.0748532	0.1024	0.0819953	0.0752211	0.120664	0.0907392	0.0803967	0.0872864	0.0758854	0.0668129	0.0867855	0.0703346	0.0864817	0.0704159
0.148055	0.133157	0.0875424	0.168401	0.1085	0.110186	0.080963	0.102845	0.0765726	0.0638071	0.0991344	0.0762594	0.101687	0.0980427	0.141736	0.109896	0.115682	0.0816217	0.0834514	0.127637	0.0855741	0.0732502	0.0860071	0.0535194	0.0709523	0.0514995	0.11863	0.068078	0.0587786	0.0658261	0.0576205	0.0859164	0.0901139	0.0816623
0.131815	0.0970804	0.0898929	0.0580611	0.0764659	0.0891374	0.0770092	0.113044	0.126373	0.119478	0.0948175	0.106274	0.0591047	0.130854	0.0670595	0.119979	0.117276	0.150976	0.280079	0.293066	0.0928727	0.155672	0.136268	0.117838	0.0909001	0.0703497	0.0671496	0.165772	0.0708813	0.110093	0.0859226	0.115725	0.0893832	0.121555
0.149897	0.0866216	0.152837	0.154153	0.113496	0.145219	0.083488	0.170589	0.115971	0.0578046	0.0749821	0.0708085	0.218545	0.196639	0.0947317	0.0953786	0.282119	0.129907	0.177123	0.167665	0.180559	0.127335	0.0661078	0.0457988	0.0449459	0.0737981	0.198222	0.114746	0.0490766	0.209358	0.0914092	0.0718848	0.0437584	0.101589
0.0887303	0.172558	0.0589797	0.146308	0.129602	0.140495	0.0989822	0.0546597	0.103583	0.0719076	0.12275	0.155082	0.0891706	0.07825	0.0988349	0.0706131	0.105288	0.0498777	0.0775217	0.133118	0.133113	0.0977913	0.109464	0.117681	0.185067	0.0968297	0.0836726	0.110686	0.119554	0.0521083	0.0693714	0.0735497	0.0616228	0.0666652
0.0735831	0.0704614	0.0634517	0.0556181	0.127	0.0689445	0.0827082	0.0932739	0.117597	0.067572	0.0918664	0.0757664	0.0819108	0.0560971	0.1244	0.0726541	0.0793322	0.0639165	0.0942071	0.0682044	0.0753426	0.0753376	0.0872097	0.0886356	0.0799923	0.0589351	0.0842572	0.0623507	0.124755	0.0830268	0.0946265	0.0791102	0.080277	0.0845886
0.137087	0.0771015	0.0752029	0.121415	0.0932018	0.0806336	0.0936281	0.0665127	0.0922577	0.116519	0.0950979	0.0703299	0.0758411	0.0963992	0.0831478	0.0793513	0.0757119	0.0752318	0.0886364	0.0615459	0.0952012	0.074332	0.0748037	0.0951573	0.0587271	0.0667952	0.0936212	0.101969	0.0739546	0.0620159	0.0702599	0.0512111	0.0739273	0.070828
0.17683	0.196523	0.219996	0.183338	0.184455	0.165864	0.185303	0.23116	0.245147	0.217625	0.186113	0.262886	0.23151	0.22801	0.2138	0.199874	0.238886	0.166995	0.154657	0.149467	0.172143	0.206723	0.181105	0.177617	0.195621	0.181893	0.212133	0.17436	0.205524	0.186869	0.228078	0.145129	0.217272	0.127197
0.118844	0.0957974	0.139167	0.102591	0.0777002	0.100025	0.0758621	0.0634486	0.0919064	0.0727404	0.0752166	0.0863073	0.0869907	0.111819	0.0859919	0.0792451	0.077864	0.0834959	0.131153	0.0674118	0.105954	0.0970156	0.0940783	0.105758	0.122389	0.132235	0.115896	0.103802	0.103564	0.11308	0.118741	0.115219	0.0701956	0.0781204
0.012514	0.0129179	0.268231	0.197176	0.106438	0.11232	0.119258	0.255278	0.232734	0.22423	0.210642	0.155717	0.188962	0.0867726	0.145566	0.162994	0.0710101	0.126177	0.00999172	0.042845	0.18311	0.11288	0.189355	0.150912	0.199816	0.134357	0.107553	0.109842	0.154006	0.10908	0.102599	0.159606	0.173823	0.0975675
0.0721366	0.133397	0.155915	0.119762	0.178504	0.115341	0.114933	0.0852995	0.142773	0.1065	0.0805613	0.108	0.0916139	0.093376	0.0695592	0.163298	0.15235	0.14876	0.154205	0.161972	0.212919	0.102434	0.110027	0.0988449	0.0720254	0.0868043	0.128711	0.105299	0.0879116	0.124733	0.106335	0.0928232	0.0986334	0.0827278
0.130959	0.0727788	0.148558	0.0741125	0.0759646	0.0909562	0.0587664	0.0963681	0.100033	0.0896995	0.120753	0.112806	0.168874	0.120015	0.15315	0.119449	0.120849	0.0919029	0.0609234	0.0986894	0.083704	0.0870425	0.0974004	0.0766759	0.0631646	0.092478	0.081378	0.0774392	0.0878446	0.0842959	0.114479	0.144709	0.0950156	0.0928
0.0695795	0.102813	0.14379	0.0922252	0.0903471	0.0667313	0.084016	0.0813678	0.0938891	0.0835823	0.0958796	0.128979	0.10339	0.124121	0.101762	0.155248	0.088946	0.0938407	0.111914	0.113632	0.115108	0.0922787	0.0687648	0.0707772	0.075205	0.0722562	0.0912417	0.0710455	0.0687162	0.0882114	0.0633056	0.0704765	0.0754857	0.0868371
0.106939	0.14849	0.107996	0.113467	0.072985	0.143503	0.0897565	0.156579	0.0701611	0.118658	0.10842	0.100067	0.212906	0.202066	0.110596	0.17923	0.0928212	0.139072	0.0902269	0.156199	0.100725	0.136124	0.0659848	0.18154	0.171973	0.103325	0.0699933	0.174031	0.0806497	0.203591	0.134424	0.109421	0.120471	0.197877
0.210411	0.14313	0.0847825	0.158584	0.112836	0.100718	0.114681	0.194587	0.179115	0.00694469	0.151258	0.100415	0.147948	0.157788	0.138556	0.13487	0.176871	0.0863354	0.127898	0.10521	0.158133	0.0718021	0.106359	0.0862615	0.10248	0.0990975	0.127038	0.0882829	0.0853391	0.0996139	0.0979728	0.150345	0.110478
0.00471809	0.0496048	0.118145	0.186583	0.155652	0.202284	0.112552	0.0957524	0.217718	0.0829702	0.181196	0.102162	0.149783	0.126359	0.133196	0.0699101	0.101104	0.0962734	0.0991713	0.0713982	0.187977	0.137291	0.128116	0.0982458	0.1151	0.155657	0.219467	0.101483	0.272664	0.146336	0.192406	0.216617	0.084495	0.226649
0.0684508	0.0803421	0.0883306	0.0706935	0.106965	0.113767	0.0688174	0.0918077	0.100177	0.0870294	0.0757078	0.0983379	0.0735395	0.0685612	0.0832282	0.0749336	0.0917952	0.0731204	0.121012	0.0508044	0.10003	0.108477	0.0743989	0.101878	0.072839	0.0727247	0.115338	0.0864314	0.0606521	0.0632515	0.0883149	0.0746899	0.110484	0.0666763
0.111721	0.130363	0.201071	0.0910505	0.0904783	0.0826128	0.0870808	0.140185	0.112571	0.0618755	0.134886	0.0815083	0.12486	0.0760551	0.0804555	0.0838077	0.076169	0.0635298	0.107375	0.0876974	0.0806329	0.141201	0.0586082	0.0874656	0.0930123	0.0804995	0.165298	0.12141	0.081475	0.0857943	0.11765	0.0775985	0.0874329	0.0971932
0.208775	0.187046	0.164633	0.220541	0.157029	0.114384	0.215974	0.160004	0.182128	0.179418	0.130409	0.1884	0.165157	0.179946	0.205589	0.146838	0.0900522	0.0885416	0.0666585	0.0741701	0.06685	0.130121	0.0747103	0.142757	0.127306	0.106109	0.122341	0.0817154	0.0812317	0.00710812	0.0751131	0.0809862	0.0490719
0.0938966	0.0656236	0.121423	0.132498	0.146629	0.244167	0.061403	0.070645	0.152825	0.149733	0.102865	0.103479	0.092073	0.0672748	0.128549	0.0757316	0.0949102	0.1822	0.0772712	0.0784905	0.145876	0.165091	0.18166	0.124497	0.117539	0.0598063	0.0954181	0.099657	0.0698064	0.00679204	0.14153	0.148026	0.10166
0.0875232	0.105793	0.0849218	0.130877	0.139478	0.105183	0.0925908	0.105551	0.0624631	0.0737337	0.0635821	0.0916703	0.0716864	0.105401	0.0803116	0.103132	0.0711428	0.0603444	0.0924779	0.0670607	0.0594114	0.0742692	0.115028	0.0814224	0.0737503	0.0610028	0.0850653	0.156688	0.0778046	0.00705237	0.0877296	0.0751733	0.0588842
0.228695	0.10432	0.311347	0.140029	0.196753	0.145274	0.0998909	0.0995912	0.192245	0.372431	0.110326	0.141311	0.0715531	0.0707175	0.145556	0.126115	0.12595	0.0892855	0.0846589	0.0766722	0.080519	0.0739485	0.233882	0.0658116	0.176015	0.110679	0.117436	0.163077	0.208777	0.00689267	0.123082	0.140456	0.06435
0.0987895	0.0751043	0.151803	0.0876735	0.076315	0.0611045	0.0773024	0.088216	0.0718352	0.0625408	0.10169	0.0908665	0.114659	0.0764812	0.0688769	0.118422	0.0662021	0.105106	0.104606	0.112059	0.0682325	0.06797	0.146494	0.0751103	0.0735484	0.100853	0.0767097	0.121055	0.103195	0.00694469	0.0955967	0.0973708	0.101885
0.166038	0.100402	0.180521	0.115259	0.0567848	0.0493247	0.143594	0.0922479	0.0720176	0.0598833	0.0918759	0.124013	0.0660946	0.0941658	0.0711959	0.0498872	0.113888	0.0714847	0.0648087	0.101598	0.0718451	0.0569578	0.0855201	0.0720479	0.069946	0.0538685	0.086823	0.0580126	0.0675389	0.0607588	0.0663778	0.0579092	0.0936173	0.0902392
0.147372	0.144666	0.153237	0.123646	0.120871	0.0674093	0.110038	0.158317	0.111784	0.139479	0.156483	0.14941	0.124236	0.0977041	0.212135	0.109735	0.105338	0.102824	0.184185	0.128185	0.0767346	0.206633	0.160305	0.0868639	0.134565	0.0752479	0.0872923	0.22238	0.181626	0.180223	0.107319	0.223164	0.282209	0.100279
0.129784	0.105176	0.116028	0.144257	0.141502	0.119638	0.105383	0.0983865	0.0945236	0.101889	0.0543178	0.0757736	0.0460263	0.0816132	0.0608764	0.0680694	0.0684804	0.0631372	0.0515599	0.0720984	0.0786091	0.0871638	0.0972968	0.0763871	0.0564009	0.0831022	0.0578511	0.0932545	0.0669891	0.0826119	0.0908664	0.0948466	0.150159	0.0854783
0.07346	0.111578	0.0799185	0.10811	0.0793079	0.0905476	0.0718091	0.123179	0.0575983	0.082117	0.0593197	0.119524	0.138153	0.0702239	0.152769	0.0917331	0.106797	0.0760853	0.0919665	0.082037	0.105612	0.0848221	0.0769814	0.106876	0.0600664	0.0922543	0.0991171	0.0884034	0.0700901	0.115726	0.0992773	0.112546	0.0841089	0.105652
0.1088	0.0805987	0.0678163	0.0682689	0.0725882	0.0727978	0.0644793	0.0716781	0.0443909	0.0614376	0.0674673	0.0914909	0.0914995	0.0930273	0.0772015	0.0821804	0.0423273	0.113248	0.0632655	0.0669305	0.0618156	0.0864185	0.103507	0.0752482	0.0684242	0.0643967	0.0744181	0.0725854	0.0681071	0.12344	0.0801478	0.0907425	0.095174	0.0724215
0.0572645	0.114141	0.0923627	0.159332	0.105126	0.104502	0.0596854	0.113989	0.0554347	0.134664	0.061847	0.0998822	0.0744611	0.0780471	0.170284	0.111053	0.0786439	0.0791686	0.110216	0.0862693	0.0663823	0.127469	0.0779306	0.0783687	0.0752175	0.0688882	0.0583203	0.0898845	0.0902667	0.080107	0.0930399	0.102918	0.108724	0.117278
0.0352383	0.0874425	0.0577536	0.0633508	0.0371711	0.0822267	0.0542741	0.0890837	0.0477307	0.079222	0.0423575	0.066268	0.0511131	0.0774503	0.0462912	0.0609142	0.0901001	0.0685998	0.0749424	0.0655212	0.0559114	0.0678093	0.0575913	0.0699061	0.0557134	0.0550871	0.0621777	0.0638686	0.0687725	0.0633082	0.0859421	0.0926683	0.0824144	0.0552365
0.0971905	0.130819	0.145127	0.0718988	0.0988085	0.0588783	0.105775	0.135384	0.133709	0.0784487	0.0825894	0.112918	0.135783	0.0870995	0.143173	0.0932996	0.080737	0.0762785	0.100252	0.117028	0.112128	0.0906367	0.154166	0.0913898	0.0582796	0.058363	0.0675079	0.113362	0.091232	0.117752	0.211991	0.0871947	0.142361	0.0527204
0.0721039	0.0767205	0.0832963	0.106601	0.0561988	0.0970799	0.0694459	0.0792482	0.0777729	0.0907009	0.0701382	0.116464	0.0804734	0.0888086	0.0569856	0.0836976	0.0608223	0.0685852	0.0807361	0.1071	0.0863864	0.071694	0.0817681	0.0789498	0.0549368	0.0706697	0.0713676	0.060129	0.086632	0.0644671	0.0724044	0.123893	0.0990977	0.0804998
0.0674965	0.135889	0.0652242	0.118078	0.0622591	0.129227	0.0646426	0.127622	0.0865493	0.116397	0.0846044	0.130103	0.0890661	0.0877037	0.0782225	0.102866	0.107827	0.079199	0.142085	0.0872695	0.0773909	0.0906932	0.0882538	0.106416	0.0990844	0.0984891	0.0876915	0.0973917	0.115609	0.0965312	0.085388	0.10847	0.0921998	0.0960093
0.131132	0.172945	0.165015	0.139286	0.109748	0.15354	0.121296	0.172016	0.16932	0.203805	0.150664	0.263345	0.191591	0.224243	0.134449	0.147883	0.207683	0.151842	0.186671	0.113157	0.122532	0.211222	0.200689	0.160181	0.125277	0.211875	0.228365	0.204696	0.223684	0.137502	0.233843	0.125379	0.138581	0.191025
0.268669	0.108536	0.165942	0.235515	0.163004	0.162628	0.110915	0.1202	0.167032	0.130074	0.122936	0.0780953	0.138507	0.106037	0.173175	0.150209	0.170125	0.15966	0.149652	0.140199	0.134829	0.184033	0.105863	0.152979	0.178711	0.0948953	0.246024	0.157548	0.183044	0.0932991	0.199594	0.153827	0.133192	0.135294
0.177129	0.233749	0.0716887	0.0748496	0.209036	0.12058	0.0755072	0.102322	0.0924307	0.116226	0.097498	0.0908734	0.110184	0.115628	0.112261	0.109765	0.106981	0.0824829	0.0664561	0.114725	0.0643885	0.0688516	0.057138	0.0803659	0.0857922	0.0642297	0.111626	0.0984979	0.131018	0.116268	0.0806451	0.108962	0.122876	0.099975
0.103221	0.130268	0.110054	0.110098	0.0889846	0.0814557	0.0595242	0.107988	0.100442	0.114419	0.076108	0.0856683	0.0653586	0.0804818	0.140972	0.104449	0.0764353	0.110619	0.0943963	0.148132	0.0920248	0.121898	0.0922055	0.083452	0.0785059	0.0716872	0.114086	0.0795978	0.0697156	0.122195	0.108967	0.10278	0.10211	0.117922
0.125108	0.133559	0.137328	0.111298	0.0459092	0.0762815	0.0482598	0.0571063	0.0503849	0.0657266	0.0437103	0.106654	0.110204	0.0739187	0.0468046	0.0546735	0.0800482	0.138121	0.0655843	0.0725422	0.0554756	0.0662256	0.107799	0.107857	0.146036	0.146437	0.0960654	0.0783951	0.11275	0.0629333	0.0921501	0.0633472	0.0736621	0.0570048
0.0582979	0.0788627	0.0984198	0.155097	0.0677218	0.128722	0.155965	0.0970508	0.0746508	0.0596688	0.15121	0.085498	0.0986508	0.0962172	0.0968287	0.0998758	0.193618	0.204757	0.133932	0.16838	0.0791186	0.0796895	0.107364	0.113406	0.0662054	0.128385	0.103964	0.0790864	0.0651388	0.0654157	0.0883265	0.11527	0.125899	0.0691366
0.171803	0.322214	0.222848	0.292377	0.220721	0.240399	0.19219	0.319268	0.188698	0.318601	0.135813	0.152179	0.221398	0.0824052	0.13013	0.144768	0.132703	0.108478	0.149056	0.174136	0.112336	0.082908	0.162097	0.199059	0.14299	0.0800832	0.153451	0.111924	0.224927	0.160074	0.122246	0.00699791	0.13247
0.120973	0.0830851	0.111525	0.0980876	0.0845609	0.134493	0.0996426	0.141234	0.107433	0.15184	0.125466	0.152464	0.119956	0.152081	0.122141	0.171781	0.0773607	0.157422	0.0540078	0.162246	0.0955322	0.0876162	0.0955616	0.0732576	0.0538091	0.117153	0.0439918	0.116448	0.0898153	0.0792061	0.0523482	0.133919	0.0822873	0.093656
0.10528	0.0837445	0.103136	0.0819271	0.111557	0.0669665	0.0904404	0.0880423	0.0885525	0.0713437	0.0829726	0.0911359	0.0600107	0.10829	0.0816569	0.0824231	0.123575	0.0853553	0.0845425	0.0629577	0.0760105	0.0767971	0.090571	0.0756882	0.061007	0.0771318	0.0869503	0.0765904	0.0818605	0.0561338	0.0538999	0.0633845	0.0888624	0.101438
0.0771571	0.0893804	0.0665204	0.0993041	0.0641113	0.0894955	0.0542915	0.0585827	0.0712056	0.078186	0.0621558	0.0767995	0.0652814	0.0798895	0.0631485	0.065064	0.0535315	0.0607238	0.0704658	0.0732492	0.0686876	0.071908	0.0656365	0.0964392	0.0601297	0.0765669	0.0798745	0.103044	0.0694078	0.0551627	0.0566819	0.0771185	0.0626235	0.085368
0.0926344	0.0881257	0.106718	0.132108	0.13718	0.168271	0.171408	0.102036	0.117259	0.214828	0.16099	0.1531	0.124755	0.119878	0.0904602	0.198502	0.20684	0.191169	0.11954	0.174718	0.203503	0.150565	0.175428	0.2	0.157257	0.116347	0.142571	0.203239	0.224462	0.204072	0.141707	0.0245265	0.0404613	0.267116
0.114625	0.0603056	0.108049	0.0937474	0.100295	0.109209	0.0605812	0.0934335	0.0549071	0.0794932	0.12897	0.111865	0.0930253	0.0806552	0.0895997	0.096596	0.0846947	0.138042	0.0745945	0.114903	0.069421	0.0803728	0.0517654	0.146576	0.0890401	0.203523	0.0666985	0.0840742	0.0907563	0.0835969	0.114925	0.0611678	0.105988	0.0843288
0.0908072	0.0546229	0.069928	0.0602924	0.0600398	0.0658053	0.0965633	0.0634958	0.116428	0.0944949	0.0914953	0.0750361	0.129244	0.103438	0.122871	0.0615809	0.0861341	0.0870671	0.0610949	0.121783	0.0800831	0.0837624	0.063273	0.107592	0.0722171	0.0498746	0.0715725	0.0855092	0.061243	0.0870773	0.0776227	0.093935	0.0543282	0.0653258
0.0716909	0.0627804	0.0715464	0.12116	0.0991324	0.0976768	0.0882444	0.108828	0.100513	0.139016	0.136395	0.214055	0.118601	0.128184	0.10771	0.121283	0.0896949	0.0601987	0.080106	0.110713	0.117183	0.0689412	0.131528	0.0780912	0.100129	0.100667	0.087414	0.0578189	0.0663602	0.0685404	0.0668063	0.0817788	0.101173	0.110182
0.141663	0.0971499	0.104066	0.118919	0.0798318	0.125011	0.0769289	0.159605	0.0901411	0.0636972	0.0796278	0.153729	0.0786426	0.127781	0.0894772	0.100384	0.116765	0.11963	0.0982066	0.15704	0.0653147	0.0828336	0.0454063	0.0703854	0.0833214	0.0799244	0.0760931	0.0763149	0.0825342	0.116847	0.0533311	0.0729236	0.0711052	0.0652238
0.163898	0.173022	0.181934	0.137474	0.128965	0.19094	0.143133	0.217936	0.199561	0.220025	0.140356	0.168317	0.0850809	0.0640342	0.0869587	0.10664	0.174888	0.194175	0.108148	0.126625	0.190173	0.149188	0.145475	0.104989	0.174734	0.100722	0.19012	0.134261	0.185808	0.0889419	0.117558	0.160824	0.184834	0.213016
0.115148	0.122645	0.0965136	0.100798	0.104897	0.121671	0.109193	0.108655	0.0867423	0.0829983	0.0807373	0.076565	0.121465	0.0831346	0.102681	0.159593	0.115955	0.094422	0.11941	0.0982293	0.113363	0.0999008	0.109387	0.11938	0.0876733	0.132688	0.0991992	0.0898186	0.111322	0.0797168	0.120087	0.113194	0.12957	0.086337
0.114113	0.0914577	0.0848519	0.0865524	0.0509879	0.0600919	0.0432686	0.0575834	0.0610814	0.0546969	0.0488949	0.100784	0.0744366	0.165453	0.0669327	0.0790183	0.0555443	0.0809741	0.0907362	0.0659624	0.084065	0.0857641	0.0652508	0.0631655	0.0684093	0.0584001	0.0819239	0.0908249	0.0625534	0.0603767	0.109405	0.0755164	0.0900137	0.0800666
0.0403804	0.0899892	0.111089	0.142305	0.089836	0.0591155	0.0650344	0.0803456	0.158929	0.0761173	0.111506	0.148302	0.0675875	0.279598	0.076485	0.0964981	0.110951	0.0738078	0.120351	0.0823798	0.0761914	0.148702	0.234737	0.078895	0.0588893	0.0713995	0.05994	0.0629463	0.179071	0.0893957	0.0591092	0.0754283	0.119601	0.086903
0.071719	0.0791502	0.0720661	0.051098	0.0603853	0.0745274	0.0958261	0.127246	0.115374	0.105229	0.118045	0.100774	0.0823213	0.058069	0.0868791	0.0891375	0.0897336	0.0881911	0.0979868	0.0645057	0.0804481	0.0863245	0.080947	0.0751419	0.0960363	0.0678682	0.0641046	0.0835222	0.080233	0.0824006	0.0962924	0.0932229	0.0764728	0.0678842
Ube2D1-UHRF1-UBL
0.103923	0.217718	0.087726	0.0844806	0.165381	0.0938372	0.144841	0.141079	0.0700112	0.0141367	0.183677	0.167921	0.114119	0.112941	0.185411	0.150702	0.0756613	0.198632	0.143969	0.0676055	0.204633	0.119771	0.120388	0.0959188	0.133945	0.154653	0.126109	0.238157	0.139361	0.172486	0.1866	0.186013	0.0530074	0.0856152
0.214226	0.100019	0.0765629	0.127266	0.217684	0.269558	0.177528	0.211334	0.193715	0.10042	0.15605	0.185497	0.106543	0.0826564	0.112461	0.185992	0.0630936	0.135495	0.186933	0.120355	0.0986311	0.0513671	0.11719	0.158208	0.130312	0.102591	0.112899	0.136058	0.157758	0.107682	0.00457401	0.113152	0.111543	0.254348
0.127891	0.0893673	0.0425524	0.110563	0.14637	0.105685	0.0741588	0.127482	0.106922	0.130744	0.102033	0.0215544	0.168661	0.114029	0.0780799	0.0723268	0.136728	0.182678	0.132058	0.176267	0.170431	0.242924	0.108979	0.154381	0.174533	0.148411	0.0975944	0.107989	0.12936	0.0805908	0.0985713	0.159363	0.124428	0.139615
0.104086	0.16467	0.0844951	0.127027	0.0173393	0.0929542	0.177179	0.127442	0.215826	0.0889397	0.152701	0.180026	0.0413425	0.168059	0.203266	0.11073	0.219518	0.239495	0.0926365	0.112723	0.172153	0.0708581	0.132023	0.10269	0.110198	0.177748	0.123344	0.125093	0.144321	0.161346	0.0563007	0.0850248	0.0829543	0.0747135
0.0870535	0.0767509	0.16432	0.254214	0.188708	0.077924	0.110067	0.180329	0.137156	0.135464	0.186294	0.186732	0.166331	0.0976952	0.113976	0.15115	0.192703	0.165512	0.0716501	0.134571	0.201103	0.0852425	0.197873	0.172199	0.18108	0.137708	0.122983	0.00753844	0.125149	0.0738204	0.181815	0.131003	0.140489	0.152203
0.187362	0.204586	0.0988947	0.0767349	0.126448	0.183682	0.161028	0.122498	0.150195	0.136581	0.11422	0.128062	0.0767234	0.14812	0.220588	0.118815	0.0562329	0.188822	0.163414	0.124005	0.1136	0.162817	0.13201	0.108716	0.195558	0.119661	0.12403	0.123987	0.110917	0.143108	0.0502713	0.161882	0.175563	0.171279
0.0856412	0.141817	0.0214957	0.071733	0.0534557	0.204457	0.112647	0.101986	0.163342	0.19175	0.148472	0.0451738	0.116367	0.185118	0.139498	0.0914119	0.129271	0.159489	0.0489989	0.140631	0.145361	0.0647524	0.116368	0.0436045	0.157461	0.1501	0.179888	0.0560124	0.140465	0.171038	0.10092	0.0914748	0.150198	0.144712
0.0669556	0.118028	0.182859	0.168531	0.11689	0.152231	0.217037	0.122593	0.195786	0.18006	0.155384	0.0509364	0.13582	-0.027567	0.0805653	0.154812	0.040065	0.10008	0.266033	0.0807595	0.137152	0.0858946	0.13601	0.16078	0.0759641	0.00263416	0.219512	0.0374562	0.146755	0.131249	0.116191	0.121572	0.106518	0.167192
0.13697	0.234696	0.0758434	0.157297	0.137657	0.0834766	0.0942179	0.27253	0.147119	0.12694	0.110859	0.0931073	0.174135	0.130685	0.183088	0.156501	0.107659	0.172577	0.130097	0.0890768	0.168331	0.119784	0.197936	0.055164	0.179341	0.142176	0.145875	0.0855818	0.118025	0.105506	0.189834	0.103265	0.120848	0.177977
0.117008	0.0897516	0.149958	0.122001	0.146659	0.228876	0.149745	0.123634	0.0908363	0.216095	0.176349	0.131787	0.156696	0.0255655	0.122849	0.182348	0.154075	0.0684182	0.0693097	0.184607	0.1165	0.0676881	0.192832	0.0286484	0.035592	0.125454	0.227097	0.127449	0.186484	0.169628	0.131122	0.133364	0.12976	0.160694
0.0643865	0.0100207	0.206009	0.124371	0.143891	0.120847	0.0866148	0.0848001	0.19934	0.115622	0.133559	0.150596	0.135465	0.170715	0.189374	0.133723	0.201888	0.0666278	0.176496	0.0538356	0.109135	0.163875	0.164399	0.174874	0.105668	0.0412299	0.162277	0.0587583	0.0766198	0.122747	0.128936	0.123562	0.163591	0.192155
0.126807	0.159643	0.168314	0.188786	0.0808229	0.134565	0.133258	0.0653254	0.190408	0.125387	0.114062	0.0429654	0.132701	0.162727	0.0928557	0.128957	0.202084	0.0599767	0.182863	0.156926	0.143169	0.244918	0.00759376	0.146072	0.202768	0.160295	0.139062	0.132563	0.134095	0.0553567	0.179022	0.0681404	0.114891	0.176759
0.154562	0.111184	0.198617	0.166058	0.22719	0.0950232	0.185908	0.193347	0.185367	0.105181	0.106391	0.0914566	0.0763678	0.118686	0.145297	0.195726	0.1685	0.162772	0.239129	0.145484	0.144836	0.0918219	0.121495	0.179604	0.0702342	0.1151	0.15491	0.0819959	0.188489	0.14829	0.0693545	0.0807635	0.0965524	0.104861
0.138948	0.135886	0.204652	0.0564189	0.082815	0.049668	0.089525	0.144177	0.221952	0.157304	0.120255	0.0627349	0.123299	0.195747	0.162111	0.14984	0.0456615	0.114827	0.284405	0.0646691	0.204406	0.100803	0.174365	0.0366243	0.180659	0.14142	0.18612	0.124958	0.152588	0.0353818	0.0843607	0.117888	0.13699	0.17288
0.0733483	0.135394	0.153992	0.177636	0.11983	-0.00759858	0.189907	0.190544	0.143304	0.14134	0.155283	0.192719	0.141908	0.0568031	0.131412	0.096051	0.122683	0.0957119	0.0723302	0.143896	0.146851	0.123988	0.0647503	0.149812	0.0919712	0.188405	0.165204	0.171274	0.159706	0.147755	0.127585	0.147487	0.109323	0.0630897
0.112629	0.100256	0.0511345	0.127187	0.109434	0.207253	0.158497	0.188042	0.1857	0.06444	0.212961	0.146774	0.156539	0.1086	0.11414	0.16229	0.131847	0.160503	0.108502	0.176343	0.127378	0.139244	0.0683761	0.18091	0.233121	0.156129	0.194819	0.137182	0.118336	0.097013	0.205894	0.138439	0.0828799	0.126817
0.115568	0.0904841	0.179991	0.177426	0.0976617	0.110209	0.0943155	0.160107	0.199728	0.109987	0.102946	0.0737852	0.0761236	0.19449	0.205345	0.177821	0.0657579	0.0642829	0.14531	0.151517	0.0937337	0.065139	0.148533	0.12314	0.159453	0.200943	0.121065	0.121003	0.0958498	0.160566	0.109001	0.0641374	0.0656427	0.0814772
0.182005	0.206735	0.120227	0.0949259	0.169372	0.144485	0.158117	0.225584	0.199905	-0.00291604	0.136472	0.0734196	0.201237	0.173464	0.165926	0.136488	0.170671	0.122846	0.238802	0.0198347	0.227387	0.168537	0.171033	0.0976692	0.175788	0.162841	0.1163	0.225797	0.0987328	0.145157	0.0800383	0.134914	0.0992046	0.113205
0.160948	0.194433	0.0904352	0.0899881	0.0651705	0.156709	0.141178	0.215532	0.131229	0.149783	0.222142	0.179776	0.168031	0.0935301	0.155376	0.116058	0.174367	0.104666	0.168205	0.043383	0.0804161	0.0708036	0.0488917	0.152876	0.101828	0.203739	0.185118	0.0800262	0.147783	0.129069	0.146845	0.215246	0.181957	0.0544155
0.144009	0.147852	0.171964	0.0708435	0.264919	0.184937	0.0905833	0.0829711	0.0328234	0.149929	0.105929	0.0483668	0.0948394	0.137146	0.106754	0.188065	0.182311	0.159047	0.174124	0.123305	0.110795	0.119784	0.20396	0.0782322	0.115867	0.109505	0.10466	0.129695	0.144283	0.145007	0.0697766	0.224827	0.115533	0.156019
0.160017	0.117603	0.201886	0.133933	0.155124	0.143218	0.0244049	0.176824	0.126488	0.158754	0.0901446	0.267895	0.134503	0.147061	0.0663499	0.243659	0.148681	0.0976612	0.0909747	0.214567	0.1513	0.165264	0.111013	0.188526	0.108831	0.106984	0.181215	0.132403	0.136062	0.103353	0.188237	0.0775847	0.0864741	0.142339
0.259471	0.124487	0.110433	0.0890732	0.129285	0.110259	0.15562	0.0494566	0.0977325	0.162865	0.044329	0.245063	0.103309	0.111215	0.151948	0.204637	0.0623136	0.127439	0.177641	0.0786982	0.114327	0.108521	0.0970822	0.120295	0.0749838	0.176528	0.155392	0.118522	0.129457	0.0674275	0.179916	0.105266	0.17782	0.0641706
0.125884	0.063144	0.160924	0.168344	0.111563	0.128744	0.255271	0.131192	0.239593	0.167634	0.203258	0.199712	0.0895308	0.0595827	0.148574	0.158105	0.200496	0.172863	0.0642974	0.193449	0.229345	0.211706	0.105408	0.097698	0.170233	0.0786194	0.144824	0.071861	0.120899	0.100954	0.10041	0.240072	0.0957504	0.0794867
0.147409	0.178804	0.0875248	0.154896	0.180149	0.136699	0.158556	0.104794	0.133335	0.103951	0.101181	0.0745742	0.0923835	0.123611	0.160991	0.178349	0.117882	0.0982382	0.185869	0.134417	0.0736795	0.194833	0.120989	0.201162	0.155625	0.0865209	0.103164	0.118919	0.121696	0.1158	0.0827881	0.244002	0.114025	0.176918
0.140719	0.0904081	0.233025	0.0276352	0.0938548	0.17593	0.0314365	0.140146	0.159871	0.0887949	0.19327	0.194719	0.137687	0.12485	0.125937	0.0841485	0.164439	0.0811679	0.27089	0.0795757	0.181483	0.0581177	0.208647	0.0555375	0.0616805	0.17449	0.136838	0.17586	0.115051	0.183458	0.185712	0.222439	0.124492	0.212069
0.07776	0.152928	0.0928938	0.199066	0.12065	0.168902	0.169731	0.137161	0.186336	0.0706439	0.18928	0.196936	0.104889	0.0588056	0.116138	0.101498	0.0802348	0.124498	0.196195	0.100736	0.188141	0.180205	0.157937	0.144137	0.0964881	0.0913892	0.0898925	0.144646	0.200644	0.0954494	0.107475	0.164233	0.143106	0.184011
0.0831568	0.18299	0.138105	0.0738139	0.159523	0.128577	0.182178	0.0889683	0.153078	0.0839434	0.0468501	0.137059	0.17785	0.0267233	0.183313	0.02844	0.149453	0.150517	0.125357	0.0870793	0.0830401	0.0986344	0.0995054	0.0613937	0.149693	0.0735062	0.137988	0.16473	0.0818759	0.113452	0.132972	0.213731	0.0200576	0.153545
0.101991	0.0989466	0.237911	0.180171	-0.00475207	0.149425	0.095049	0.100014	0.189171	0.182731	0.0441555	0.165981	0.128564	0.183022	0.0774128	0.0865276	0.188813	0.13868	0.177499	-0.00383863	0.216176	0.136086	0.0957527	0.0638536	0.0838899	0.098266	0.194499	0.133739	0.145541	0.105607	0.171145	0.202367	0.00642179	0.117238
0.0713217	0.169931	0.169062	0.22474	0.0763346	0.111732	0.070197	0.184953	0.120289	0.0810566	0.129452	0.142097	0.0906701	0.116582	0.131067	0.0986421	0.071099	0.197554	0.137835	0.197467	0.179352	0.184978	0.13905	0.112369	0.0598002	0.0782123	0.0697892	0.0910459	0.17658	0.10269	0.111656	0.0160661	0.0969602	0.231508
0.108916	0.171962	0.141708	0.142313	0.1671	0.0921814	0.176697	0.130085	0.163076	0.131162	0.147316	0.103074	0.0848083	0.111909	0.14176	0.0527626	0.146688	0.139821	0.0781082	0.15868	0.13941	0.121245	0.137278	0.128425	0.066207	0.0319431	0.142185	0.14132	0.134438	0.13719	0.210874	0.050576	0.0799214	0.123092
0.094871	0.0801674	0.165202	0.0856709	0.163545	0.137365	0.129836	0.188554	0.15403	0.103757	0.158624	0.208253	0.0753451	0.18641	0.148397	0.138685	0.171914	0.060364	0.132007	0.207479	0.0850498	0.0962579	0.146359	0.101228	0.159824	0.196799	0.186894	7.89138e-05	0.186039	0.0815108	0.0885242	0.0926991	0.195867	0.177986
0.175038	0.126624	0.157502	0.131413	0.109711	0.083643	0.0733113	0.0650747	0.0531512	0.100709	0.11273	0.155904	0.157494	0.138443	0.0894148	0.0937022	0.12775	0.146393	0.1019	0.185329	0.0878797	0.07913	0.0639954	0.158331	0.167758	0.0853563	0.192083	0.169198	0.107839	0.121049	0.191347	0.0694842	0.054833	0.103057
0.129806	0.157312	0.0964234	0.114965	0.11102	0.125413	0.0982849	0.0903263	0.101106	0.16403	0.171075	0.205374	0.136812	0.176846	0.114652	0.100828	0.184866	0.0657345	0.0780535	0.215717	0.137456	0.122791	0.161568	0.0759293	0.129088	0.0645798	0.106361	0.154063	0.19614	0.150391	0.0847298	0.0677374	0.137835	0.102152
0.121454	0.137397	0.129337	0.239807	0.120944	0.155972	0.096495	0.0895758	0.128979	0.0796501	0.135418	0.0995443	0.0724183	0.0601958	0.0631577	0.0733278	0.088598	0.155779	0.116461	0.0788605	0.103144	0.0635226	0.0967333	0.126548	0.103425	0.0607494	0.0736217	0.17595	0.176888	0.114244	0.129889	0.109612	0.101665	0.0724039
0.17399	0.172985	0.0423572	0.193807	0.201215	0.135106	0.124593	0.237393	0.120683	0.11561	0.174994	0.156771	0.192268	0.20298	0.158378	0.088446	0.173583	0.144958	0.148526	0.124891	0.162165	0.139377	0.103648	0.137357	0.159563	0.19828	0.152441	0.184385	0.106485	0.185918	0.11256	0.141681	0.0735573	0.0959086
0.0890484	0.169383	0.146885	0.0911534	0.146822	0.143436	0.138761	0.111129	0.0890766	0.0840931	0.135376	0.0931949	0.193339	0.151276	0.0728054	0.0880038	0.11316	0.0460614	0.10448	0.191276	0.0923107	0.123043	0.112431	0.046685	0.11564	0.0603082	0.112217	0.132908	0.101682	0.204306	0.178253	0.117967	0.165178	0.157322
0.0512273	0.14104	0.108278	0.16903	0.0867598	0.155792	0.158902	0.0961946	0.0216068	0.163978	0.0793526	0.056711	0.176957	0.16363	0.084327	0.149224	0.0753983	0.131858	0.149866	0.111869	0.0617531	0.154059	0.215093	0.10805	0.112454	0.110417	0.164215	0.189744	0.0739021	0.128011	0.0649437	0.0481297	0.121034	0.0400383
0.0615249	0.10674	0.120976	0.0537156	0.00735642	0.139	0.105006	0.141516	0.0510209	0.160435	0.109583	0.190623	0.164368	0.133118	0.0842571	0.136203	0.088694	0.0545893	0.110516	0.104996	0.055172	0.123009	0.0803358	0.138716	-0.00777329	0.175701	0.104856	0.153787	0.136978	0.151779	0.164906	0.128945	0.111452	0.107706
0.131283	0.166163	0.157394	0.0397329	0.16147	0.118721	-0.000281778	0.0946988	0.101684	0.16734	0.117789	0.193768	0.176714	0.146349	0.126765	0.143627	0.153683	0.133141	0.0805908	0.136688	0.197439	0.106462	0.134762	0.0390167	0.0251574	0.212658	0.0584028	0.196802	0.111811	0.0731661	0.161495	0.0948711	0.166893	0.0960285
0.10986	0.205678	0.00625357	0.165199	0.101455	0.193257	0.09947	0.180819	0.106984	0.0935079	0.108031	0.0803679	0.144898	0.175813	0.177387	0.135354	0.189399	0.051032	0.184588	0.139671	0.0971609	0.156496	0.0959998	0.0898527	0.10922	0.112452	0.158289	0.0982016	0.124969	0.181919	0.0826817	0.0314093	0.0522564	0.134552
0.0731353	0.149455	0.126213	0.108484	0.174204	0.107439	0.0971389	0.0677664	0.0430431	0.163314	0.14577	0.149398	0.0916636	0.214673	0.150056	0.0594913	0.149552	0.156614	0.13673	0.166915	0.154316	0.281778	0.257914	0.177511	0.1728	0.150412	0.16622	0.109181	0.143321	0.130486	0.172249	0.128317	0.210276	0.163472
0.171938	0.184312	0.129862	0.0684334	0.102358	0.172849	0.109045	0.216847	0.116107	0.092473	0.0414334	0.0200792	0.0656147	0.0820345	0.158204	0.0802255	0.0730686	0.0736278	0.117453	0.186352	0.11895	0.0978094	0.150352	0.108019	0.190015	0.18823	0.0175882	0.168721	0.158691	0.154235	0.142944	0.0943547	0.0750558	0.216724
0.159603	0.0882271	0.171163	0.17191	0.070268	0.190401	0.11422	0.109567	0.0719322	0.253935	0.11125	0.124384	0.0872499	0.128395	0.136266	0.156624	0.0944144	0.0857653	0.211045	0.174153	0.0812205	0.171134	0.111671	0.151967	0.150462	0.112759	0.14271	0.0583789	0.162496	0.118906	0.0563329	0.106651	0.105093	0.115898
0.190995	0.100299	0.0882937	0.254775	0.0846571	0.110023	0.116202	0.138478	0.138093	0.224623	0.09148	0.189965	0.243199	0.105782	0.186589	0.14771	0.167338	0.179097	0.166699	0.0884851	0.0823785	0.106552	0.130739	0.0796907	0.139495	0.116316	0.099399	0.185511	0.0958059	0.177812	0.213576	0.0549219	0.175398	0.147836
0.13707	0.103491	0.11321	0.0990649	0.134895	0.153689	0.157251	0.141599	0.0872371	0.109026	0.0958046	0.118344	0.110243	0.111707	0.0548169	0.17002	0.148725	0.144634	0.188047	0.14058	0.183214	0.122784	0.0475321	0.144363	0.107089	0.0667797	0.0766293	0.217957	0.0369472	0.0933765	0.0768228	0.133135	0.111082	0.112367
0.0914345	0.111436	0.066717	0.1838	0.200247	0.208755	0.0791378	0.0890314	0.0104185	0.100296	0.163666	0.130881	0.0809793	0.199512	0.0301486	0.101952	0.0710911	0.111266	0.0551361	-0.00560475	0.0724233	0.182455	0.0708094	0.187224	0.0855027	0.144367	0.136803	0.0694155	0.149744	0.141843	0.179618	0.158106	0.172622	0.123938
0.14965	0.0845176	0.0911779	0.207961	0.116574	0.0958333	0.11533	0.0600762	0.187047	0.161394	0.188928	0.111859	0.18628	0.18437	0.109739	0.183408	0.0548146	0.101517	0.23366	0.0536389	0.142591	0.0748021	0.130299	0.18033	0.190177	0.132886	0.117499	0.0822269	0.128422	0.079813	0.151724	0.0584297	0.106214	0.0783503
0.109524	0.142195	0.0858787	0.132825	0.213035	0.113924	0.160779	0.0804596	0.170018	0.145476	0.0840229	0.185819	0.00592606	0.197584	0.150203	0.154978	0.221867	0.112245	0.152287	0.221697	0.134516	0.0641329	0.13826	0.163516	0.122806	0.0541355	0.196132	0.184982	0.0613432	0.117721	0.159772	0.0966491	0.136319	0.127368
0.104885	0.0617946	0.170363	0.154707	0.0532986	0.15701	0.0837479	0.15341	0.158874	0.141124	0.116665	0.089007	0.119229	0.105727	0.169449	0.115558	0.226862	0.166795	0.204813	0.164569	0.175301	0.128765	0.100782	0.0699977	0.113935	0.121244	0.102426	0.087542	0.146213	0.152885	0.0854746	0.139628	0.120739	0.078062
0.151478	0.129961	0.160551	0.0423797	0.128548	0.166939	0.131298	0.143776	0.157144	0.108116	0.151794	0.166661	0.167246	0.195845	0.117928	0.0784248	0.0294507	0.181376	0.0941986	0.207319	0.192415	0.185398	0.111929	0.134212	0.175548	0.145508	0.182905	0.182483	0.0736262	0.149733	0.0956025	0.181198	0.143398	0.172716
0.117313	0.101759	0.142558	0.132671	0.180309	0.0790147	0.142247	0.108739	0.179576	0.0973966	0.208139	0.17195	0.0581175	0.099145	0.15268	0.115793	0.21419	0.124246	0.150042	0.114485	0.168386	0.0956851	0.0849737	0.122441	0.132582	0.103693	0.124655	0.18524	0.134847	0.208382	0.070091	0.0932757	0.117392	0.119948
0.0817031	0.118248	0.197252	0.177589	0.154171	0.115579	0.134606	0.19899	0.151685	0.11326	0.0629121	0.17513	0.154258	0.102723	0.202511	0.0224026	0.116769	0.111623	0.19982	0.130456	0.116724	0.176203	0.0868869	0.0932587	0.144885	0.180613	0.0980451	0.0982241	0.120653	0.156628	-0.00924962	0.164587	0.162514	0.162758
UHRF1-SRA/UHRF1-UBL
0.183369	0.133461	0.0679925	0.0861979	0.112444	0.135098	0.117278	0.115067	0.140155	0.0812394	0.116019	0.0761144	0.0581367	0.0630474	0.0584535	0.089398	0.0465746	0.0852779	0.0739069	0.0931355	0.0985495	0.0871687	0.0730668	0.0876793	0.10968	0.101639	0.0619731	0.0936196	0.0888736	0.0714349	0.0599563	0.0712592	0.05954	0.0843181	0.0643797
0.0802309	0.0829813	0.0838033	0.0842327	0.0791482	0.134318	0.0977418	0.120187	0.129383	0.151705	0.110768	0.11817	0.0651095	0.119738	0.0777798	0.134901	0.0601715	0.110999	0.0986238	0.121799	0.0653272	0.0744778	0.0729304	0.111916	0.11697	0.124984	0.106689	0.149198	0.0838805	0.0685633	0.052689	0.0800467	0.0780593	0.13207	0.0906922
0.121415	0.0917217	0.0928547	0.115869	0.131412	0.0919517	0.0839586	0.0776136	0.0990915	0.0854536	0.080887	0.0856829	0.0742538	0.0879603	0.107409	0.0790078	0.10706	0.0969969	0.0888009	0.0898402	0.0844426	0.0923157	0.0844242	0.0748461	0.102151	0.0990835	0.0888005	0.1609	0.0694835	0.106748	0.0748134	0.0950727	0.0995993	0.0791242	0.116148
0.437782	0.348185	0.338711	0.243392	0.185958	0.228966	0.252882	0.193045	0.23121	0.251995	0.274471	0.247656	0.208907	0.197874	0.132593	0.258483	0.124123	0.156968	0.0841065	0.236122	0.0634285	0.250931	0.227631	0.182374	0.220624	0.0831298	0.0164315	0.145587	0.232696	0.162092	0.0976461	0.234718	0.119406	0.18067	0.0776853
0.157239	0.305428	0.125699	0.16721	0.0667967	0.162936	0.0647867	0.148688	0.0704128	0.187709	0.130062	0.113601	0.134969	0.103172	0.116457	0.138788	0.108765	0.10721	0.0737532	0.165644	0.0601199	0.116583	0.0545156	0.108224	0.0644072	0.15003	0.0607908	0.10999	0.0994964	0.106724	0.0969492	0.0770352	0.087039	0.0830046	0.0529437
0.351867	0.362471	0.162305	0.317364	0.102682	0.0935384	0.0944291	0.0748666	0.0556071	0.0877798	0.0483875	0.10077	0.0679984	0.0669776	0.0620779	0.0499531	0.0594751	0.103381	0.0649517	0.0961995	0.0646123	0.0756265	0.0612828	0.0743275	0.0682671	0.0718501	0.0528484	0.100863	0.05635	0.063996	0.0875232	0.0517481	0.0614572	0.0715296	0.057714
0.305874	0.264952	0.115504	0.108939	0.320594	0.207405	0.0662394	0.258026	0.15831	0.116786	0.274755	0.162757	0.311671	0.137057	0.216457	0.10201	0.263272	0.0676258	0.350781	0.0988667	0.346614	0.114606	0.102583	0.169703	0.239756	0.170076	0.0779584	0.164273	0.20084	0.0738694	0.0685971	0.177584	0.0667627	0.087492	0.0698578
0.154768	0.260601	0.238855	0.154855	0.060565	0.138966	0.0968529	0.10787	0.16708	0.18022	0.129976	0.240892	0.0703791	0.171894	0.0739047	0.158476	0.0494673	0.0972291	0.0442348	0.10797	0.052693	0.120819	0.0157299	0.0784193	0.125106	0.168502	0.24988	0.136681	0.0957458	0.580003	0.0702917	0.766777	0.138824	0.109142	0.106172
0.101565	0.226359	0.170922	0.185652	0.179992	0.157785	0.13831	0.108269	0.0850282	0.110176	0.102665	0.109001	0.0461935	0.0999078	0.0454316	0.0797656	0.0571676	0.091525	0.0699212	0.130985	0.0628137	0.0778214	0.091209	0.105809	0.0722664	0.0714357	0.0578174	0.129018	0.0945525	0.0923875	0.0753803	0.0511267	0.0583902	0.0850515	0.0662147
0.0597231	0.216447	0.0458577	0.171679	0.0549554	0.12542	0.051377	0.102146	0.0762772	0.067327	0.133416	0.101079	0.0486256	0.0745167	0.133447	0.0887911	0.122133	0.0654459	0.0738875	0.0782933	0.0782615	0.0914847	0.124825	0.0679444	0.0658551	0.149896	0.0812564	0.074285	0.0564658	0.0905083	0.0768903	0.062803	0.10822	0.0710072	0.0842158
0.055413	0.0600649	0.0349722	0.0908804	0.0424643	0.0706851	0.0494094	0.0664264	0.0429046	0.120056	0.0622945	0.0917337	0.0505324	0.0766447	0.0598455	0.0782736	0.0545699	0.0695488	0.0616994	0.153942	0.0468737	0.0979348	0.080059	0.0877739	0.0796235	0.0746525	0.0889432	0.0879769	0.0856734	0.105454	0.08074	0.0742228	0.0740701	0.117594	0.0810687
0.257223	0.2577	0.144333	0.171004	0.132962	0.100717	0.11327	0.303779	0.141963	0.276816	0.099475	0.101829	0.129519	0.112674	0.0527773	0.116114	0.03918	0.109211	0.0597067	0.0923815	0.0775332	0.143557	0.0817264	0.0725965	0.0761311	0.123039	0.109416	0.121132	0.0840923	0.072728	0.0767945	0.12844	0.595083	0.624053	0.100032
0.0444859	0.0964703	0.0973865	0.091943	0.0721805	0.129418	0.0626553	0.118479	0.102813	0.0914075	0.0685332	0.109146	0.0803872	0.103825	0.117695	0.0761993	0.0706458	0.177943	0.073969	0.1874	0.0728927	0.110236	0.0686438	0.0822705	0.0856066	0.149011	0.0677941	0.112748	0.0727871	0.0998396	0.101051	0.121573	0.0897248	0.123656	0.119037
0.417044	0.151648	0.145802	0.232428	0.086144	0.273537	0.0850911	0.191284	0.136721	0.149176	0.0873861	0.29343	0.111931	0.264219	0.072359	0.275862	0.102034	0.216078	0.0848825	0.162075	0.111091	0.192073	0.10641	0.101226	0.0724631	0.117159	0.0893448	0.205902	0.113832	0.134924	0.0771786	0.152514	0.0822401	0.103537	0.0820819
0.171535	0.171331	0.165493	0.242246	0.23417	0.0972243	0.113506	0.0828689	0.119895	0.0863042	0.0613286	0.111045	0.0943871	0.101595	0.0799288	0.142455	0.118589	0.110695	0.0941912	0.0686424	0.102075	0.0917127	0.097331	0.0834331	0.127905	0.0753913	0.0886962	0.087119	0.0915933	0.0583199	0.0905335	0.07683	0.12825	0.0865074	0.0690608
0.0687522	0.11102	0.0570776	0.153907	0.272959	0.0874576	0.179084	0.0841909	0.0880317	0.138967	0.0435069	0.0670043	0.070688	0.134204	0.0548664	0.172772	0.0367809	0.0933165	0.0936268	0.133876	0.0592418	0.205094	0.0983622	0.083913	0.0962368	0.0890509	0.0943507	0.134506	0.0860895	0.0779841	0.0667385	0.0954799	0.0917214	0.0707606	0.0995521
0.25457	0.132635	0.121754	0.118443	0.097835	0.128334	0.0871018	0.105126	0.10569	0.0684653	0.110205	0.148049	0.110805	0.116663	0.0996051	0.139315	0.100923	0.106225	0.104701	0.093271	0.0777556	0.108932	0.0717625	0.068038	0.0733902	0.0850448	0.112773	0.0850254	0.069588	0.128707	0.0790356	0.119826	0.0848387	0.12688	0.0966201
0.175567	0.332661	0.27014	0.15762	0.229798	0.190251	0.18276	0.143053	0.140924	0.165033	0.104397	0.184544	0.165915	0.204725	0.162068	0.182135	0.161506	0.158155	0.104206	0.147199	0.176907	0.0780929	0.108775	0.148747	0.14618	0.114426	0.119	0.116211	0.0902258	0.12781	0.0946586	0.143681	0.117821	0.143953	0.128776
0.49792	0.324733	0.340044	0.11873	0.250575	0.102925	0.0777795	0.079509	0.270655	0.1125	0.170428	0.0828936	0.085551	0.101317	0.121457	0.0772729	0.135803	0.0959962	0.105983	0.101442	0.0631409	0.107721	0.151017	0.0980582	0.0766548	0.0703744	0.0751237	0.112609	0.0964987	0.109302	0.0691109	0.0906602	0.108589	0.0735375	0.12026
0.201777	0.198182	0.0622418	0.22881	0.18321	0.178194	0.0698038	0.247603	0.2623	0.117415	0.164506	0.147725	0.0489264	0.22052	0.066414	0.0961184	0.113428	0.109429	0.0887714	0.0836853	0.0743421	0.092338	0.0645642	0.0987672	0.0772432	0.0838477	0.0500523	0.0644926	0.0870148	0.118741	0.0792888	0.0981671	0.0659263	0.114547	0.0975402
0.103723	0.147972	0.112529	0.200671	0.114356	0.10983	0.0843409	0.11129	0.0800794	0.151158	0.108934	0.249606	0.0856858	0.107676	0.0806885	0.151543	0.0575559	0.0963613	0.0783195	0.095142	0.089489	0.103355	0.0881398	0.118059	0.0967707	0.112484	0.114088	0.115119	0.0795822	0.100681	0.0809202	0.177981	0.085113	0.126931	0.0818548
0.0822382	0.0772535	0.0363733	0.116723	0.0401176	0.0902524	0.0973023	0.0695568	0.0967142	0.0907417	0.0995814	0.109629	0.107178	0.098667	0.0606856	0.131057	0.0864805	0.0869769	0.106607	0.0871094	0.0822574	0.064119	0.104923	0.105829	0.0633983	0.0757952	0.0821446	0.0948403	0.0641034	0.0847232	0.0817786	0.07646	0.0881581	0.0746397	0.0969876
UHRF1-SRA/UHRF1-UBL W2V
0.0932257	0.0828015	0.115589	0.140772	0.0998262	0.0756275	0.0898835	0.105982	0.0513728	0.0704017	0.0371287	0.0458615	0.0233011	0.0599138	0.0401142	0.0559301	0.0499433	0.0579538	0.0283154	0.056163	0.0432524	0.0664904	0.0389671	0.076908	0.0306862	0.118615	0.0210801	0.056466	0.0648998	0.074669	0.0263011	0.0312919	0.0438163	0.0520249	0.0320347
0.0409181	0.0637964	0.0674336	0.0726139	0.0481445	0.06743	0.0652784	0.0438872	0.048647	0.0672369	0.0792066	0.0865943	0.0615803	0.0652687	0.0714861	0.0899395	0.0590022	0.0631241	0.092893	0.0514238	0.0851353	0.0580443	0.0532771	0.0708609	0.0755179	0.0678776	0.0502712	0.050477	0.105084	0.0881915	0.08588	0.0560167	0.0871967	0.0774527	0.0666885
0.0770478	0.0693641	0.13116	0.067944	0.0564009	0.0761801	0.0514715	0.0789813	0.0779186	0.0694946	0.0741528	0.0602342	0.0872885	0.0629223	0.0641563	0.0641708	0.0740071	0.0767818	0.0923126	0.101342	0.0707373	0.0986001	0.0808228	0.0587886	0.0331621	0.102788	0.0749956	0.0668181	0.094898	0.065311	0.0522025	0.0646936	0.0764072	0.0608587	0.0686739
0.104385	0.1835	0.112753	0.218031	0.0749352	0.0858316	0.0652627	0.067977	0.0268429	0.0561491	0.0440045	0.0634152	0.0451685	0.0574573	0.0311272	0.0730847	0.0332453	0.107313	0.0547738	0.0663148	0.0337695	0.0922186	0.109923	0.104541	0.0388594	0.0641238	0.0598422	0.0749559	0.0369562	0.105094	0.0514217	0.0659394	0.0512091	0.135631	0.0418523
0.0695971	0.0756756	0.0681949	0.0755157	0.0721032	0.111585	0.0868281	0.0579067	0.104668	0.069818	0.0457053	0.0600859	0.0484054	0.0962583	0.086589	0.0572598	0.0714737	0.0862942	0.0764282	0.0781946	0.067463	0.153523	0.093911	0.0843867	0.061698	0.0711008	0.0776272	0.0520081	0.0845925	0.0727826	0.0812397	0.0686515	0.147572	0.102686	0.0554341
0.0893893	0.0648219	0.0625857	0.0820324	0.0641701	0.0631996	0.0689819	0.115406	0.0800454	0.0616077	0.12007	0.0734965	0.0698334	0.0696198	0.06894	0.127766	0.0773763	0.12789	0.0962826	0.0792579	0.104765	0.107671	0.0745285	0.0795417	0.103839	0.0865964	0.0666	0.06344	0.0799812	0.110103	0.0923794	0.0906236	0.099203	0.0978048	0.0789755
0.114011	0.0832875	0.0957843	0.0929269	0.0807766	0.0951108	0.0724074	0.0660151	0.0684352	0.0785387	0.080349	0.0866014	0.0716638	0.0764571	0.070174	0.0873832	0.0817307	0.09728	0.0895637	0.0816921	0.0752377	0.0685985	0.0955824	0.0835031	0.0897915	0.0729412	0.0980233	0.0754847	0.0988897	0.135335	0.0904778	0.0914354	0.100063	0.0801217	0.0757622
0.091183	0.0909727	0.11067	0.112686	0.115403	0.0811122	0.0614364	0.111595	0.0865425	0.0771825	0.101035	0.0724836	0.0714897	0.110451	0.08433	0.073274	0.0694882	0.0817884	0.102522	0.101991	0.0762924	0.0743125	0.066302	0.117991	0.0753058	0.0869378	0.0875651	0.0590953	0.0816536	0.0730281	0.0853444	0.0864672	0.0801276	0.0847743	0.0940791
0.14892	0.0791817	0.0842448	0.0919966	0.0853245	0.0831756	0.0907458	0.0943732	0.0713282	0.108596	0.0682404	0.0950323	0.0920122	0.0879412	0.140674	0.0757271	0.0690997	0.081803	0.0685117	0.0589277	0.104859	0.089873	0.0621225	0.0881035	0.0701637	0.105664	0.0778136	0.0718896	0.0602651	0.0994799	0.0701032	0.0995353	0.129358	0.0978266	0.0958972
0.0787352	0.102739	0.199853	0.0780423	0.155142	0.119568	0.0557683	0.0624005	0.0800152	0.0752652	0.113911	0.0727177	0.0728061	0.0998934	0.105275	0.098886	0.0725066	0.0583006	0.110495	0.0963157	0.0813975	0.120718	0.0850873	0.0524062	0.0684264	0.100216	0.0684985	0.0786971	0.0734083	0.0732283	0.0734984	0.0598898	0.105614	0.0927213	0.101217
0.0744879	0.122277	0.0821009	0.101653	0.0677249	0.108232	0.104355	0.0854408	0.0798406	0.0834034	0.11488	0.0947124	0.0873329	0.0880862	0.0644598	0.0703419	0.0802593	0.0735118	0.106156	0.108627	0.0773931	0.0679595	0.0936193	0.0926941	0.106811	0.110655	0.0686627	0.0798789	0.0819261	0.0987987	0.103136	0.114104	0.0821961	0.0827875	0.0925813
0.0845124	0.129058	0.0970929	0.101086	0.0513105	0.104139	0.0861907	0.129894	0.0693761	0.0822463	0.079792	0.0917651	0.126045	0.113734	0.0988354	0.062454	0.0779029	0.102802	0.0800755	0.0731004	0.164123	0.0930601	0.0745258	0.0780442	0.121855	0.100336	0.0757773	0.0995755	0.0701871	0.0733551	0.065537	0.0647984	0.0892685	0.0730067	0.0807567
0.0716617	0.0763134	0.0662014	0.08451	0.100726	0.11298	0.0728843	0.0986135	0.0685586	0.0716575	0.0900224	0.0736367	0.0979719	0.0715887	0.0726233	0.106021	0.0693824	0.0480458	0.0832972	0.0779822	0.105395	0.130427	0.129488	0.125059	0.170173	0.067275	0.0571546	0.0828234	0.0826621	0.104161	0.120573	0.125162	0.0839464	0.0937687	0.0735877
0.125351	0.0817432	0.0936113	0.130655	0.0659998	0.119693	0.0741312	0.0583166	0.0831955	0.0653509	0.103459	0.10413	0.0987113	0.0650755	0.0808923	0.0625036	0.107511	0.0797671	0.0920106	0.151651	0.0838045	0.0864267	0.0869902	0.0956493	0.148736	0.0818247	0.0798514	0.089227	0.073187	0.056346	0.0785064	0.102697	0.116569	0.127684	0.0622284
0.102608	0.0779786	0.100383	0.117064	0.105516	0.0749306	0.0975562	0.109586	0.095261	0.0717524	0.0668114	0.109975	0.096507	0.122748	0.0972454	0.0792701	0.100774	0.0838956	0.0947423	0.0790183	0.0973781	0.101699	0.0935837	0.0893004	0.0968689	0.0720609	0.0807873	0.072349	0.0838897	0.0988835	0.0968989	0.0997636	0.0800442	0.0767165	0.100996
0.082204	0.0892434	0.0836241	0.0919853	0.0833426	0.10217	0.0671109	0.154372	0.131037	0.0714102	0.0892834	0.0762457	0.0832348	0.165356	0.0813407	0.0986815	0.10598	0.0990077	0.088686	0.122513	0.0867545	0.121443	0.0616229	0.0433193	0.105839	0.104785	0.0718891	0.0716521	0.0760117	0.120904	0.0607259	0.0701589	0.0906695	0.113258	0.0721235
0.0604402	0.107409	0.0904701	0.0806538	0.0893552	0.0707386	0.101213	0.0771407	0.107023	0.081859	0.0835451	0.0744071	0.0969852	0.0865872	0.067562	0.0904614	0.0829116	0.0892797	0.10087	0.102035	0.0750255	0.0744903	0.0957023	0.114778	0.0711993	0.138614	0.0742496	0.0838673	0.069958	0.133631	0.0767278	0.0831791	0.0695271	0.107925	0.230651
0.10737	0.0649281	0.100555	0.10513	0.135971	0.07592	0.0973201	0.0501226	0.0969901	0.0913277	0.105553	0.0682296	0.0851072	0.0769571	0.0853368	0.131177	0.131315	0.0830689	0.0934708	0.161065	0.0951417	0.0781099	0.079008	0.0475512	0.126102	0.0428735	0.113127	0.0640945	0.108053	0.0729354	0.104884	0.082172	0.078813	0.0967561	0.124071
0.117505	0.116109	0.14467	0.0703443	0.0666244	0.102746	0.0704731	0.0687335	0.159435	0.0863963	0.0903343	0.0850048	0.118326	0.122513	0.100779	0.10084	0.0865386	0.0917183	0.119845	0.112554	0.0808177	0.121391	0.0711068	0.0940695	0.086401	0.0664227	0.0912362	0.0599257	0.0993048	0.0793187	0.0972285	0.0795107	0.0660857	0.141428	0.0759483
0.0668683	0.112607	0.071111	0.0991537	0.0763004	0.086491	0.0924695	0.0840811	0.166562	0.06378	0.110091	0.0916242	0.125722	0.0973179	0.0997043	0.0765436	0.111843	0.0894306	0.0530946	0.104189	0.0585729	0.104805	0.0627673	0.141245	0.0702037	0.0513746	0.116525	0.0647907	0.0909747	0.121894	0.0980146	0.177183	0.170435	0.0966575	0.095866
0.0687578	0.0952086	0.0655045	0.0935395	0.0903595	0.117691	0.0742641	0.0999571	0.0746855	0.126243	0.108842	0.106135	0.111607	0.0850338	0.0627307	0.0972661	0.107854	0.140162	0.0966889	0.111275	0.114042	0.106641	0.125257	0.0764488	0.100383	0.0874445	0.100306	0.155862	0.0695089	0.08945	0.0682371	0.103518	0.111421	0.103297	0.109516
0.0751791	0.0974881	0.104554	0.0798302	0.0605062	0.08035	0.0738173	0.0834814	0.100842	0.104655	0.11649	0.110933	0.0934649	0.116611	0.0580541	0.087803	0.0583819	0.148468	0.0697312	0.137869	0.0543658	0.100165	0.101467	0.171683	0.112164	0.150785	0.0561169	0.0918217	0.0813506	0.106631	0.0855648	0.125233	0.124106	0.0938908	0.178677
0.0608219	0.058515	0.0818844	0.134768	0.0974866	0.12129	0.0963096	0.108932	0.0698436	0.0865188	0.0857657	0.107028	0.0727072	0.101378	0.0649207	0.10044	0.102143	0.0734126	0.0726148	0.0909442	0.0617937	0.141916	0.103676	0.118505	0.124257	0.113979	0.14168	0.112187	0.135064	0.0930439	0.103013	0.118352	0.146888	0.0920176	0.12202
0.101276	0.0812534	0.100779	0.128747	0.136876	0.069544	0.138253	0.185849	0.0811924	0.0929559	0.0869532	0.0946551	0.116555	0.0711805	0.0770944	0.0911993	0.0915372	0.0909469	0.101981	0.103059	0.0884449	0.0798226	0.0832411	0.0996325	0.0868892	0.117803	0.133344	0.0847456	0.134882	0.118228	0.109026	0.0728873	0.0816347	0.0888973	0.119999
0.147101	0.0636979	0.107624	0.10115	0.11698	0.140437	0.0889184	0.12472	0.0784799	0.0878065	0.0675028	0.120804	0.105869	0.104891	0.111272	0.078875	0.11395	0.087502	0.132785	0.0923898	0.114709	0.0765128	0.0763077	0.0882787	0.0870183	0.121863	0.111901	0.0795443	0.113712	0.0705707	0.0899131	0.0977785	0.119384	0.110009	0.112771
0.0848118	0.108295	0.0732045	0.100924	0.100285	0.0976051	0.106474	0.140456	0.130789	0.0912003	0.108025	0.13837	0.114795	0.0957439	0.114966	0.104473	0.0958264	0.113302	0.138167	0.108483	0.0828698	0.0821413	0.10415	0.109138	0.127506	0.0991228	0.0895321	0.170827	0.0911409	0.112367	0.107537	0.0452506	0.0272418	0.108118	0.0724347
0.0918053	0.0566982	0.0926395	0.0859668	0.0643499	0.121256	0.142958	0.0988399	0.0909819	0.133921	0.137906	0.141211	0.180928	0.102373	0.109193	0.104978	0.0546575	0.123094	0.0875589	0.133918	0.0896272	0.107289	0.0638197	0.0751047	0.0858486	0.0848173	0.0891661	0.107638	0.149752	0.091728	0.103236	0.115097	0.10572	0.12088	0.0697164
0.13986	0.119755	0.130621	0.138267	0.144772	0.0727386	0.0845963	0.126848	0.103673	0.0854483	0.0653133	0.0744811	0.0972058	0.0798673	0.0813066	0.0654	0.0940422	0.0945385	0.108728	0.0901295	0.0809523	0.117119	0.0873088	0.162854	0.0748769	0.151574	0.0686727	0.119664	0.144266	0.109961	0.198132	0.0885234	0.0868154	0.086316	0.0793727
0.122368	0.124734	0.0959455	0.170497	0.107153	0.174488	0.19643	0.0746059	0.0796296	0.116198	0.0568595	0.109072	0.0421212	0.0717572	0.0510518	0.0831876	0.0854305	0.0870575	0.13793	0.0834124	0.0810579	0.142546	0.0473191	0.106156	0.0628393	0.0987859	0.103926	0.179329	0.174262	0.0633853	0.106584	0.0942379	0.0923629	0.121421	0.119573
0.106315	0.0390964	0.0681118	0.0662256	0.136811	0.27127	0.0510615	0.0751247	0.171075	0.0470158	0.123023	0.105617	0.128131	0.0601157	0.0739769	0.0582512	0.11972	0.075147	0.0545974	0.171748	0.104197	0.113943	0.102759	0.0600457	0.124704	0.187471	0.0640026	0.14516	0.141891	0.100348	0.147338	0.139008	0.0657472	0.0546207	0.125088
0.124391	0.0786507	0.082623	0.0760396	0.0784688	0.113933	0.202916	0.0980041	0.108061	0.139895	0.098993	0.117699	0.108124	0.10862	0.118755	0.0958976	0.0808355	0.0759711	0.0899873	0.0956314	0.146418	0.113573	0.122623	0.0982789	0.0961609	0.089058	0.0922627	0.122646	0.0712247	0.192265	0.155892	0.0834491	0.0812689	0.0874631	0.0978832
0.217994	0.214934	0.175517	0.0673268	0.0787179	0.0997128	0.135631	0.146071	0.195028	0.160078	0.0907909	0.0876636	0.0803335	0.160252	0.121172	0.0945967	0.089099	0.0713576	0.0839917	0.0722105	0.107958	0.0976055	0.114923	0.0953417	0.115999	0.080388	0.065769	0.0911822	0.0656458	0.0849268	0.0748304	0.0668389	0.0870922	0.081642	0.0762105
0.125457	0.115064	0.0839317	0.101128	0.105327	0.0720511	0.108444	0.0881008	0.0828702	0.0973926	0.156673	0.104371	0.106997	0.12651	0.10814	0.0795913	0.140468	0.0877382	0.0932019	0.140269	0.0911024	0.11084	0.091498	0.115801	0.102292	0.115936	0.134071	0.127225	0.141877	0.15389	0.0996653	0.0951091	0.101198	0.0656687	0.103711
0.10737	0.0649281	0.100555	0.10513	0.135971	0.07592	0.0973201	0.0501226	0.0969901	0.0913277	0.105553	0.0682296	0.0851072	0.0769571	0.0853368	0.131177	0.131315	0.0830689	0.0934708	0.161065	0.0951417	0.0781099	0.079008	0.0475512	0.126102	0.0428735	0.113127	0.383719	0.122296	0.122149	0.120087	0.204712	0.121385	0.0942169	0.0858379
0.018738	0.0724067	0.0909238	0.101375	0.086928	0.0670299	0.0694567	0.0630001	0.0155546	0.0356622	0.15867	0.196186	0.175381	0.247202	0.191326	0.119508	0.0770035	0.0635717	0.157587	0.196992	0.105616	0.126425	0.122688	0.198254	0.165894	0.160472	0.102877	0.110308	0.0463794	0.0643083	0.0676169	0.0861088	0.0842529	0.107978	0.0627856
0.0815993	0.0791217	0.0946425	0.0728391	0.0833816	0.0572519	0.0743211	0.182868	0.0985398	0.0785179	0.0593742	0.0752036	0.121799	0.100358	0.0791795	0.178114	0.151669	0.162697	0.161545	0.0806983	0.134832	0.0840523	0.144221	0.141574	0.0998394	0.164415	0.0903642	0.0787002	0.0864857	0.168031	0.157359	0.103598	0.122338	0.0747044	0.0924608
0.119328	0.0892494	0.0714455	0.0976805	0.125121	0.125331	0.119504	0.135798	0.0775548	0.0767104	0.126725	0.0754024	0.128447	0.0901204	0.119358	0.0846051	0.122187	0.150026	0.137577	0.108425	0.131592	0.118035	0.116415	0.0803377	0.101032	0.0669196	0.117765	0.0813852	0.151683	0.1512	0.109159	0.148173	0.103805	0.10069	0.0614542
0.183277	0.149553	0.0757823	0.0754538	0.0913557	0.124019	0.201077	0.122562	0.201108	0.0695166	0.0656594	0.0761726	0.16915	0.154419	0.10198	0.161757	0.151971	0.126789	0.129616	0.162201	0.0940353	0.113481	0.118311	0.0591306	0.0969884	0.0782537	0.0758107	0.0689419	0.0904067	0.0878296	0.0908849	0.0879442	0.0663945	0.0614772	0.0699213
0.0808482	0.0955028	0.159571	0.100275	0.0882784	0.0958151	0.0996811	0.112761	0.0800966	0.209647	0.0837117	0.0954738	0.087114	0.08126	0.118636	0.109758	0.0902824	0.109683	0.120872	0.143304	0.171854	0.0843458	0.125398	0.124248	0.149259	0.100156	0.109883	0.118501	0.0824252	0.0881041	0.122035	0.110521	0.105081	0.122852	0.120141
0.136487	0.0779013	0.111509	0.203243	0.0985263	0.0636772	0.171905	0.163839	0.112007	0.0669636	0.0771405	0.0917093	0.103716	0.178898	0.102206	0.1179	0.114272	0.114498	0.110571	0.168342	0.1522	0.0228727	0.111901	0.0735709	0.0843957	0.111265	0.05608	0.115962	0.11277	0.07764	0.0607554	0.156448	0.144392	0.123741	0.123243
0.101781	0.148817	0.0750374	0.117632	0.202588	0.211067	0.111569	0.208457	0.158584	0.145578	0.0786302	0.123684	0.0606585	0.0715451	0.180923	0.0775179	0.114049	0.104289	0.106372	0.0985608	0.137295	0.102565	0.0618399	0.100591	0.0579333	0.105355	0.0591359	0.0938256	0.0810506	0.0935015	0.0936239	0.0908408	0.124895	0.10138	0.179448
0.0889997	0.128936	0.0844569	0.079139	0.0998722	0.154481	0.11387	0.114999	0.135879	0.10384	0.127167	0.194415	0.118426	0.1234	0.0894493	0.135653	0.0968521	0.14348	0.11999	0.141446	0.14189	0.0802131	0.105302	0.110066	0.174173	0.119311	0.084298	0.123025	0.101627	0.105914	0.0982242	0.10328	0.0759607	0.0993384	0.0932714
0.0724424	0.11708	0.116744	0.0923557	0.101053	0.0656655	0.117387	0.0763125	0.12597	0.237315	0.048024	0.0646015	0.159442	0.102358	0.14363	0.133398	0.132727	0.108625	0.18216	0.103942	0.129726	0.105955	0.167905	0.0816548	0.115201	0.0693877	0.0723715	0.170233	0.104355	0.0898257	0.0649234	0.120558	0.184803	0.11661	0.140462
UHRF1-SRA/ Ubiquitin
0.0879691	0.113705	0.117539	0.0603901	0.0956702	0.0666135	0.0791424	0.107417	0.0808382	0.0730711	0.118009	0.0744073	0.0816339	0.0701641	0.078894	0.0705995	0.0985005	0.0443649	0.10179	0.0833889	0.0842459	0.0780629	0.113851	0.0592898	0.078232	0.0656416	0.0778533	0.0955702	0.0902493	0.0931716	0.0980364	0.0762062	0.076397	0.0989453	0.0784945
0.143955	0.0712004	0.0852464	0.120824	0.109633	0.102953	0.0971618	0.0931985	0.0793059	0.0618151	0.0880347	0.102721	0.110792	0.0693254	0.0960849	0.0742412	0.079412	0.0878083	0.0943371	0.075677	0.0885978	0.11632	0.107352	0.0739337	0.102261	0.0716383	0.151469	0.0817422	0.189321	0.120387	0.0752023	0.0712918	0.0795861	0.116962	0.108554
0.0669147	0.0568411	0.0825605	0.0671572	0.0793389	0.063634	0.0781641	0.0565946	0.062319	0.0728883	0.0651964	0.0823981	0.0661098	0.0642112	0.073391	0.0465385	0.0803475	0.0556501	0.0957775	0.0760843	0.0781394	0.0737545	0.0710624	0.0544118	0.076056	0.0577014	0.0808307	0.0634044	0.0809495	0.0523064	0.0734555	0.0687119	0.0757907	0.069997	0.0646805
0.0689791	0.0811975	0.0779883	0.0878739	0.0752918	0.0756272	0.0736032	0.0851268	0.0878149	0.0970778	0.138747	0.194233	0.0802016	0.0805687	0.0993086	0.0964776	0.0798858	0.095354	0.0898916	0.0915731	0.0877629	0.0918777	0.0880245	0.0570668	0.0820268	0.0612533	0.0847443	0.0676238	0.086427	0.0888419	0.0889514	0.0700385	0.094602	0.0643448	0.104549
0.0784474	0.0733676	0.0844635	0.10101	0.0962592	0.0595778	0.0800541	0.0532828	0.141731	0.0561087	0.130377	0.0492827	0.0759961	0.0657282	0.0936584	0.0504969	0.0692786	0.0711481	0.0783098	0.0698413	0.0678777	0.0835321	0.0919629	0.0782861	0.07333	0.0684527	0.0814764	0.0905557	0.0672979	0.0538473	0.105604	0.0487041	0.0674709	0.05929	0.0814496
0.0788103	0.126072	0.072633	0.0804134	0.0752822	0.107773	0.097037	0.0703325	0.0754125	0.0683551	0.0750215	0.111749	0.076718	0.0820288	0.0929138	0.0883021	0.102809	0.0902509	0.0752588	0.0903935	0.0769175	0.110549	0.0842929	0.0940625	0.117549	0.0821763	0.108364	0.0898764	0.0678471	0.0801261	0.0715155	0.106026	0.0863113	0.0982716	0.0806205
0.093752	0.109476	0.0793304	0.103872	0.0750058	0.0946071	0.0944932	0.0694509	0.0797953	0.0586322	0.093829	0.109832	0.0921998	0.0588535	0.108748	0.0569986	0.0927154	0.0723831	0.0692902	0.0715557	0.0744564	0.0569147	0.0739909	0.074352	0.0826972	0.075318	0.0808496	0.0672603	0.0737561	0.0608732	0.0695187	0.0789971	0.151764	0.183213	0.0674098
0.0798935	0.102198	0.0605278	0.0983793	0.120229	0.11535	0.103049	0.0680865	0.106301	0.0632291	0.0825087	0.0908922	0.047512	0.0681095	0.141164	0.111154	0.0785767	0.0783314	0.074346	0.0727649	0.0681221	0.069371	0.0721546	0.108464	0.0685623	0.0582171	0.061378	0.0734666	0.0681705	0.067406	0.0638615	0.0826465	0.101739	0.0854311	0.163531
0.106188	0.0633501	0.105379	0.0868682	0.1032	0.0556521	0.0711078	0.0816803	0.131299	0.0924562	0.0806192	0.0606375	0.0768757	0.090313	0.0715411	0.0608537	0.0688608	0.0664338	0.0979171	0.0799212	0.0787004	0.326207	0.0699047	0.267222	0.0963845	0.0527712	0.102904	0.100071	0.0884264	0.0795833	0.0724699	0.0655937	0.104303	0.0699093	0.084673
0.0699791	0.101333	0.126676	0.0606013	0.095132	0.113628	0.0648008	0.056201	0.0766826	0.0821674	0.10055	0.0962176	0.0681467	0.0913328	0.109969	0.121807	0.0692311	0.0726518	0.0985919	0.0714146	0.0765982	0.101434	0.0727483	0.0898688	0.0991156	0.080557	0.0821323	0.0697131	0.0828046	0.0790167	0.0887282	0.056631	0.0732456	0.0690457	0.192982
0.0803472	0.0737063	0.0784028	0.0824215	0.089256	0.061306	0.0857268	0.0493142	0.0775805	0.0757211	0.073357	0.0827672	0.0674427	0.0556183	0.100533	0.0755499	0.125283	0.101963	0.0845	0.0750433	0.0947139	0.0832709	0.0782276	0.168522	0.0739358	0.104805	0.101637	0.0879587	0.0952827	0.0971892	0.0725751	0.0965874	0.107401	0.113174	0.0865776
0.0609118	0.106239	0.0880996	0.065516	0.0794257	0.0859826	0.0912279	0.0706957	0.0946711	0.0739327	0.0747878	0.0714446	0.0805796	0.0790004	0.0856273	0.0617211	0.0850484	0.0585826	0.0689621	0.0626778	0.105722	0.0443458	0.109607	0.0628865	0.0781644	0.062586	0.0930663	0.0718785	0.0941562	0.0786906	0.0773232	0.0617469	0.081438	0.0684298	0.0904357
0.098663	0.0929319	0.0897015	0.109965	0.120608	0.0790857	0.0791909	0.0784013	0.116088	0.0979443	0.104318	0.062767	0.100162	0.110534	0.0847089	0.0738766	0.0905715	0.0601891	0.0719639	0.0793391	0.130876	0.059064	0.0963461	0.0733503	0.0986752	0.0879158	0.0811695	0.0861064	0.105749	0.0909056	0.0855187	0.0622701	0.0978532	0.0884248	0.124947
0.0926779	0.0801373	0.162657	0.130908	0.108317	0.0912537	0.086614	0.111421	0.0884553	0.0793713	0.112916	0.0830068	0.104847	0.117943	0.104962	0.0820266	0.112092	0.0964417	0.086332	0.101549	0.149146	0.0892525	0.117608	0.0739479	0.110901	0.119635	0.104044	0.101735	0.104116	0.0880807	0.101972	0.0913085	0.102862	0.0895676	0.12736
0.0748697	0.0825437	0.131061	0.0983878	0.0849345	0.120712	0.0626742	0.0682209	0.114129	0.0905984	0.0720261	0.0629781	0.0722342	0.0704964	0.106677	0.0590542	0.102606	0.0672879	0.0818133	0.0732753	0.0887734	0.0623921	0.0802536	0.0681403	0.0852703	0.0691806	0.127201	0.0705096	0.0772275	0.0754724	0.0758682	0.111297	0.0826022	0.120352	0.101193
0.0869782	0.0653389	0.0735777	0.0724922	0.0679486	0.0561085	0.0775702	0.0429325	0.0879745	0.084259	0.09167	0.0665681	0.0922517	0.0906116	0.082759	0.0742213	0.115719	0.0781289	0.081367	0.0819624	0.061121	0.103704	0.0687945	0.0601724	0.0717772	0.0754647	0.0982056	0.065897	0.0599837	0.0767486	0.0799935	0.0688578	0.0938719	0.0980526	0.120777
0.0764832	0.0592391	0.0647304	0.0892931	0.0910853	0.0719919	0.0827702	0.0627113	0.0826986	0.0657345	0.0856241	0.0583105	0.0883507	0.0553951	0.0957225	0.0765716	0.092381	0.0700645	0.0834909	0.0668816	0.0808977	0.0782774	0.0701887	0.0886925	0.0849867	0.0594808	0.0825452	0.0790486	0.0834507	0.058663	0.0628801	0.0509974	0.0832121	0.0790362	0.0877762
0.0723809	0.10666	0.081256	0.180697	0.109411	0.0999419	0.0840907	0.0642267	0.0621191	0.064937	0.083495	0.079205	0.0903006	0.0528903	0.109215	0.0557883	0.0947195	0.0707538	0.0775698	0.061303	0.100253	0.0621629	0.0878639	0.073675	0.0821632	0.0895088	0.0935082	0.0573099	0.101655	0.0613893	0.121623	0.0699251	0.0758919	0.082573	0.0932756
0.0657998	0.0728418	0.0697539	0.0660764	0.105626	0.0610634	0.0687219	0.0557732	0.0853978	0.0636063	0.0929421	0.0791195	0.0732356	0.0731248	0.0970896	0.074528	0.0686685	0.0619857	0.0890398	0.0929297	0.0780209	0.0528389	0.0834626	0.0593695	0.0837719	0.0613328	0.110896	0.0591189	0.0736199	0.0557561	0.0950636	0.0674346	0.0837217	0.0734282	0.0718174
0.0764544	0.0733076	0.1085	0.109427	0.125021	0.087026	0.129915	0.0696538	0.147792	0.101314	0.081593	0.075271	0.0848223	0.0923633	0.109914	0.108117	0.0797948	0.106061	0.0925316	0.0872554	0.0746529	0.0981587	0.0741863	0.0654323	0.0832793	0.0647536	0.0777366	0.0926532	0.0805964	0.0607194	0.0785905	0.0696183	0.0897995	0.0996522	0.0963869
