# Supplementary material for: Mechanically transduced immunosorbent assay to measure protein-protein interactions
Source: eLife. 2021 Sep 28;10:e67525. doi: 10.7554/eLife.67525 (PMC8479797; doi:10.7554/eLife.67525)
Supplement: Figure 4—source data 2. — Results from statistical tests comparing the indicated pairs of rolling parameters (METRIS). [file elife-67525-fig4-data2.xlsx]

## Sheet: Sheet1
Ube2D1	Comparison	Ubiquitin
	Ubiquitin	N/A
	UHRF1-UBL	<0.0001
UHRF1-SRA	Comparison	UHRF1-UBL	UHRF1-UBL W2V
	Ubiquitin	N/A
	UHRF1-UBL	<0.0001	N/A
	UHRF1-UBL W2V	<0.0001	<0.0001
